# Supplementary material
Source: ML conference proceedings conference paper supplement (https://openreview.net/forum?id=e9cV4xSjbR)

## Multitask Pretraining

**TG80**

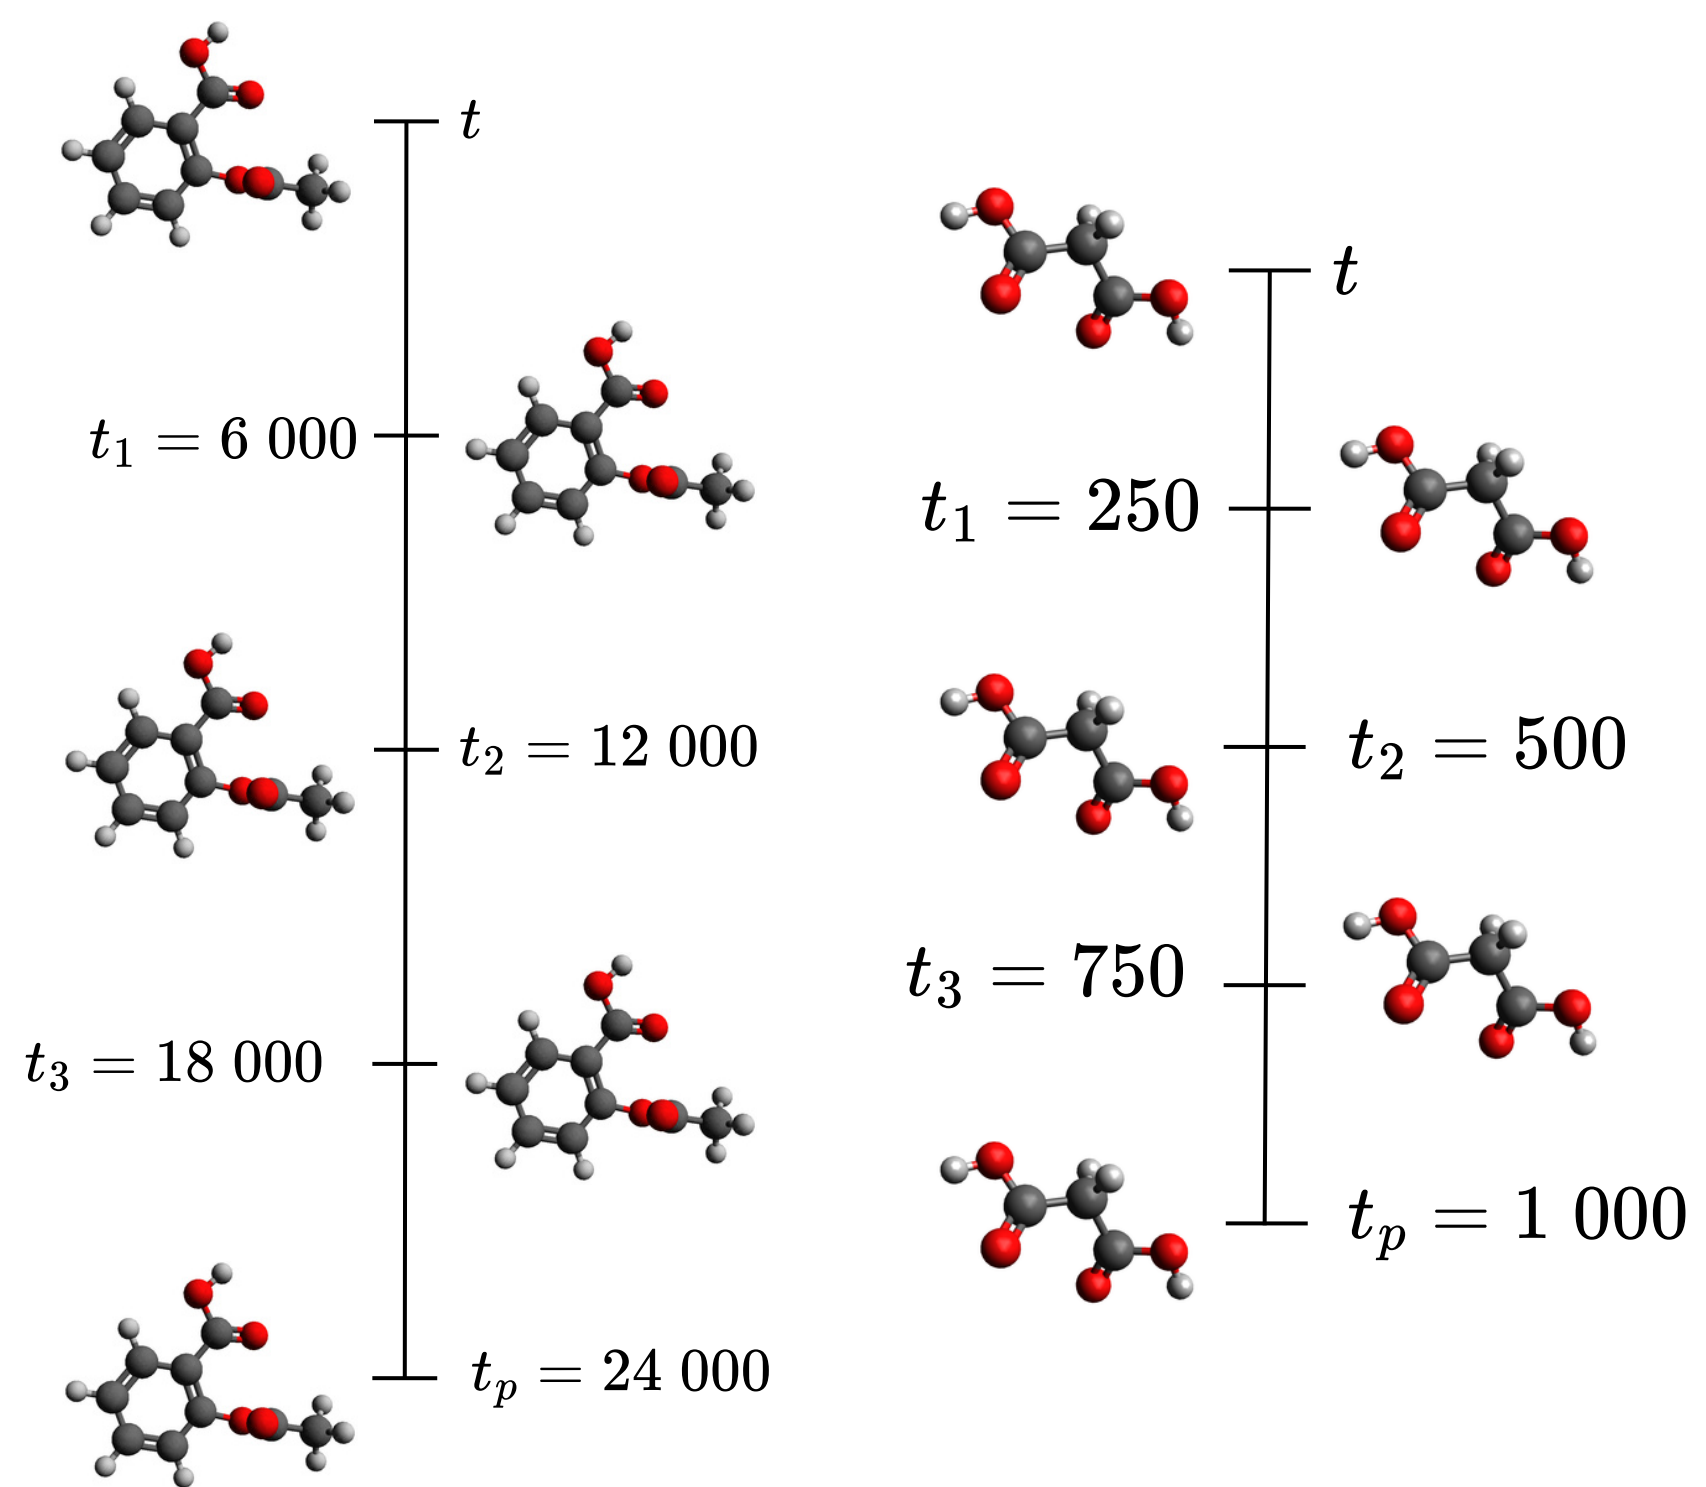

## Inference

**Query molecule**

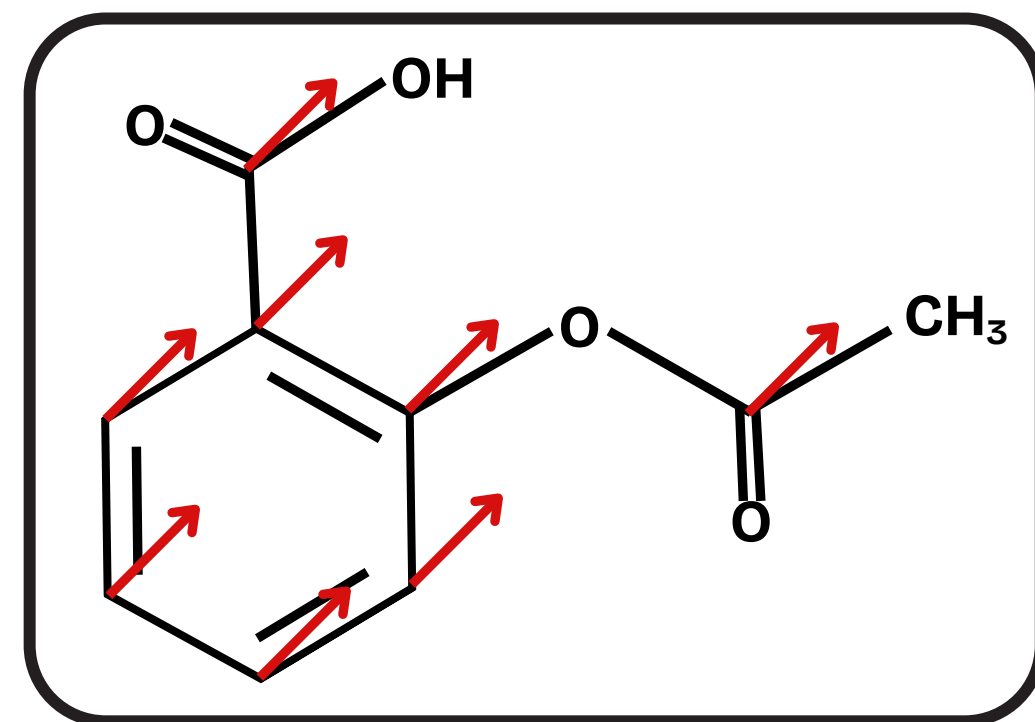

**Query times**

$$\Delta t \sim \text{LogUnif}(\cdot, \cdot)$$
$$t_1, t_2, \dots, t_P$$

**ATOM**

**Equivariant lifting**

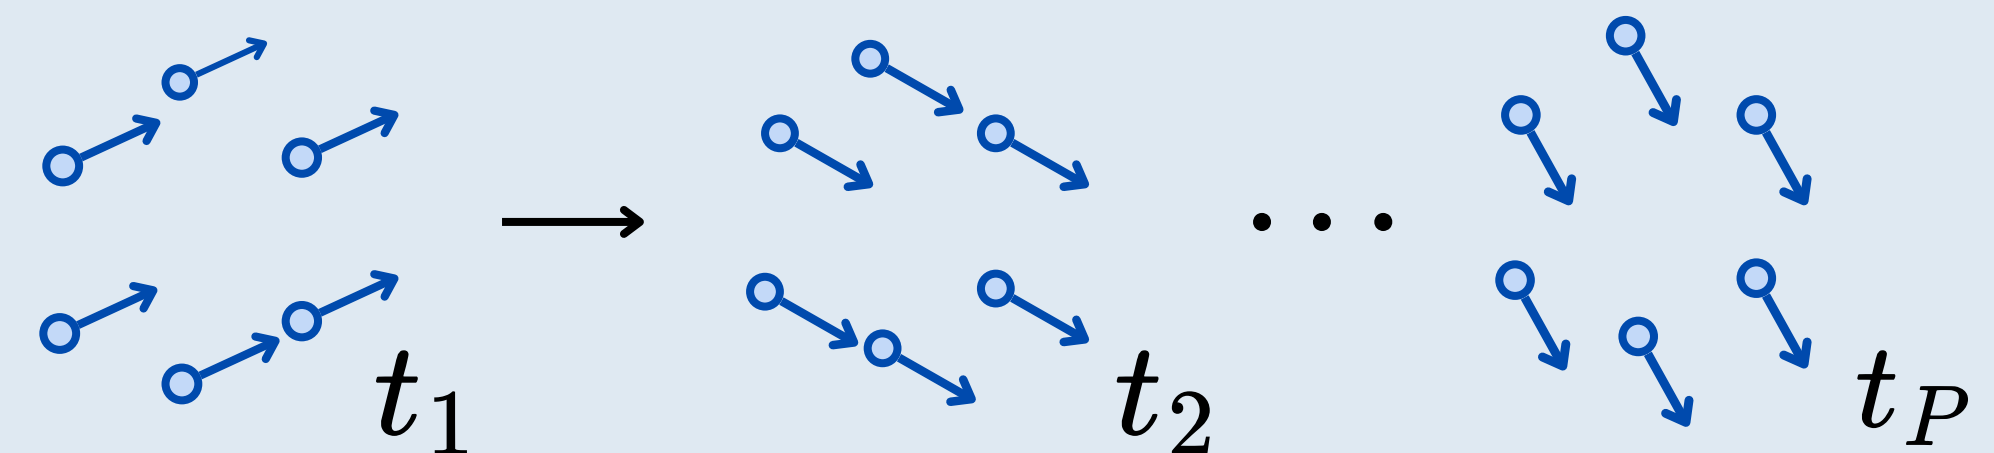

**Heterogenous Temporal Attention**

**Phase space**

**Positions**

**Velocities**

**RRWP**

Multitask

**T-Rope**

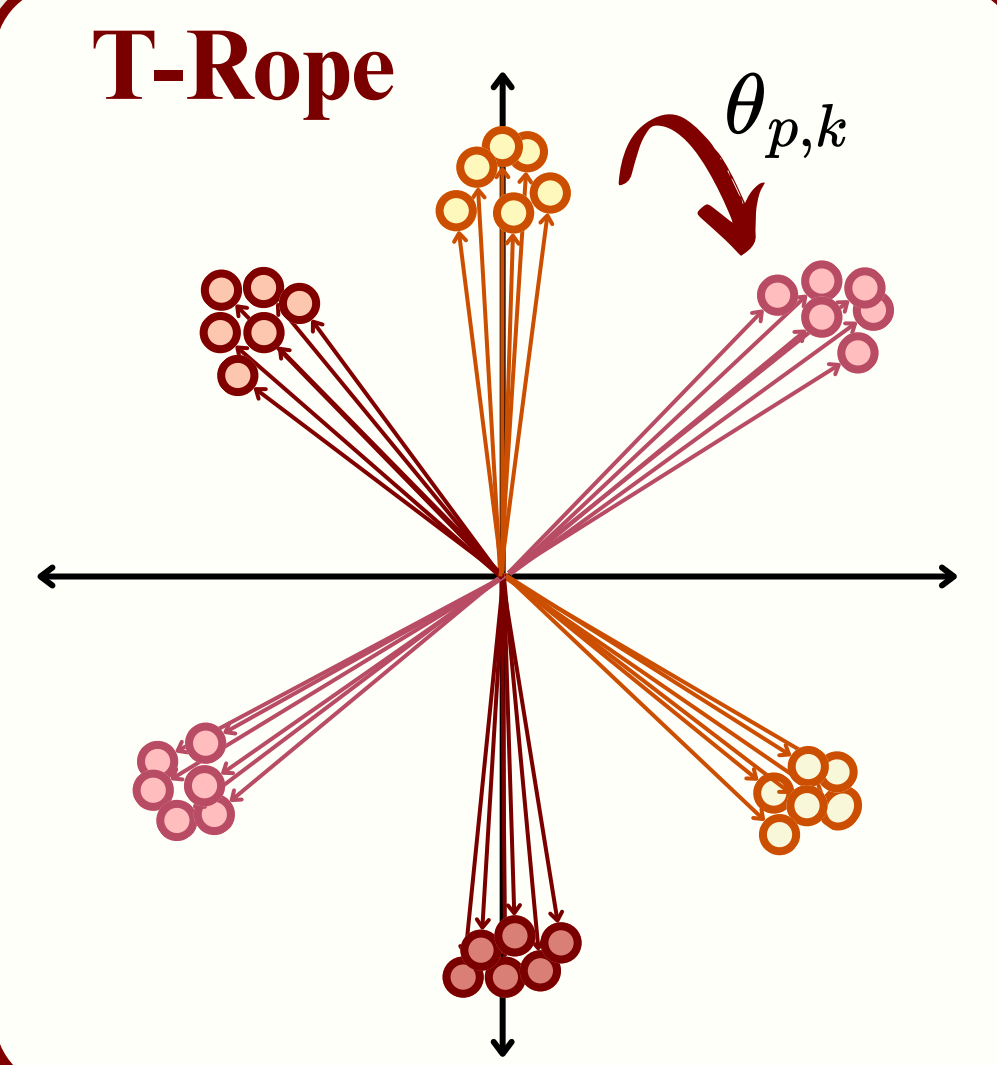

**Projection**

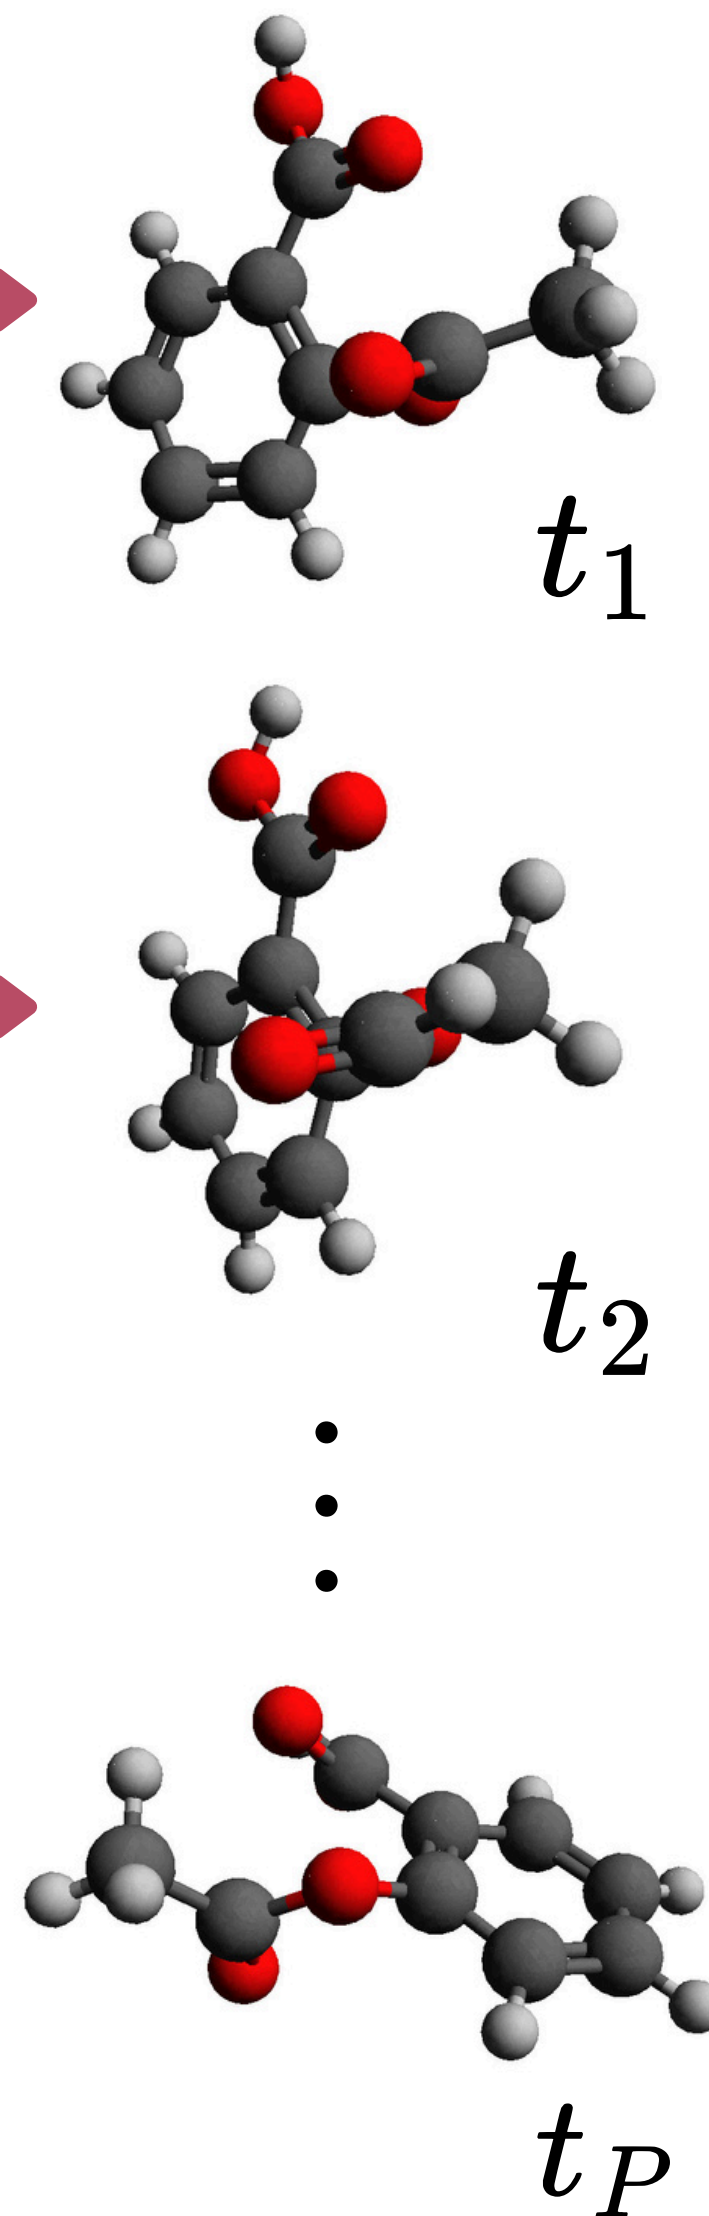

Supplement: supplementary_material [file new_architecture.pdf › Z_paper_content/readme_content/new_architecture.pdf]
