# Supplementary material
Source: ML conference proceedings conference paper supplement (https://openreview.net/forum?id=e9cV4xSjbR)
Supplement: supplementary_material [file tg80_combined_trajectories_1.pdf › Z_paper_content/trajectories/tg80_combined_trajectories_1.pdf]

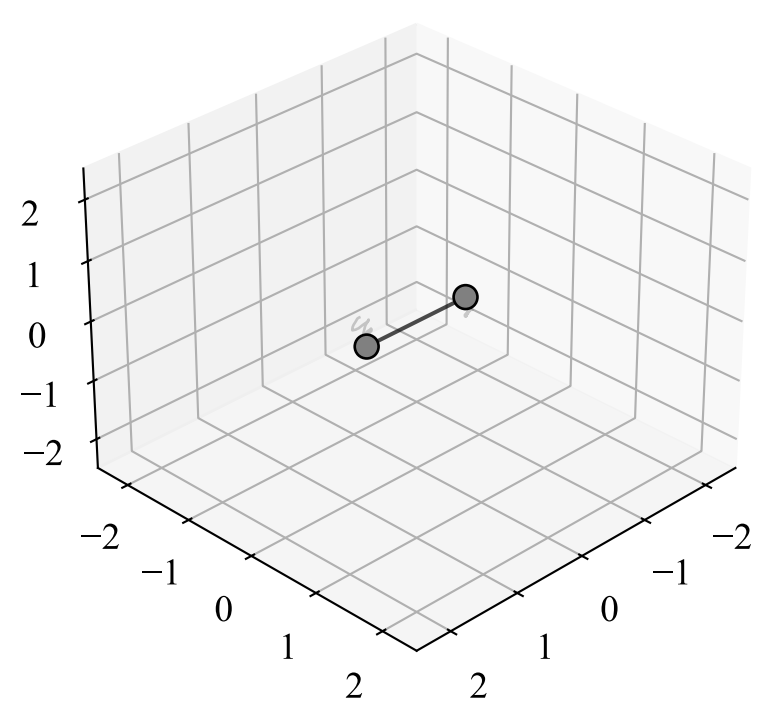

1,2-Dichloroethane

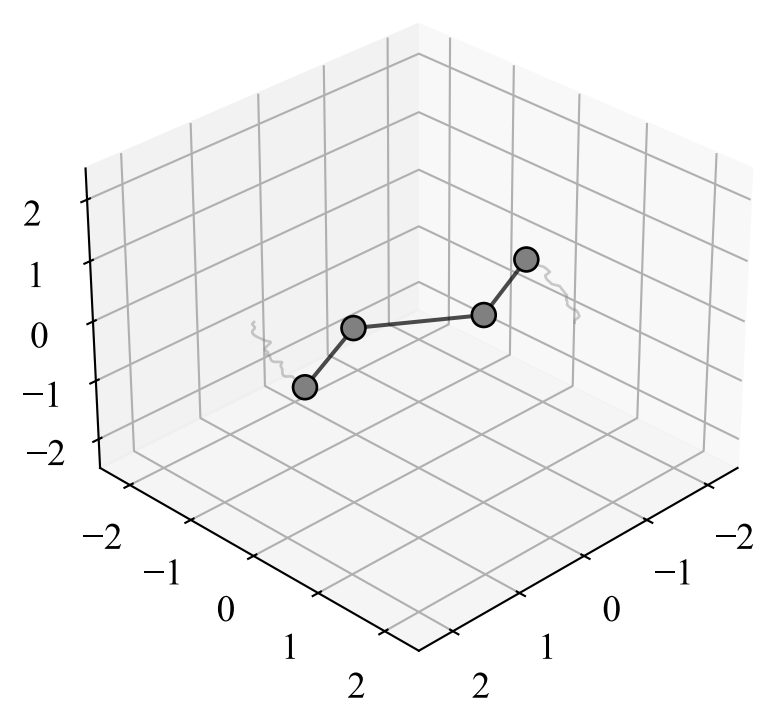

1,3-Butadiene

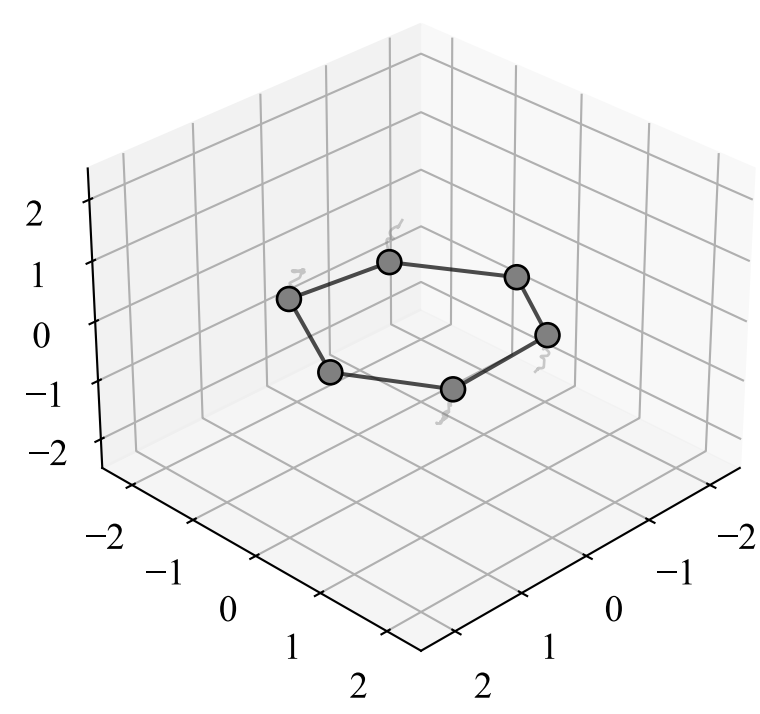

1,3-Cyclohexadiene

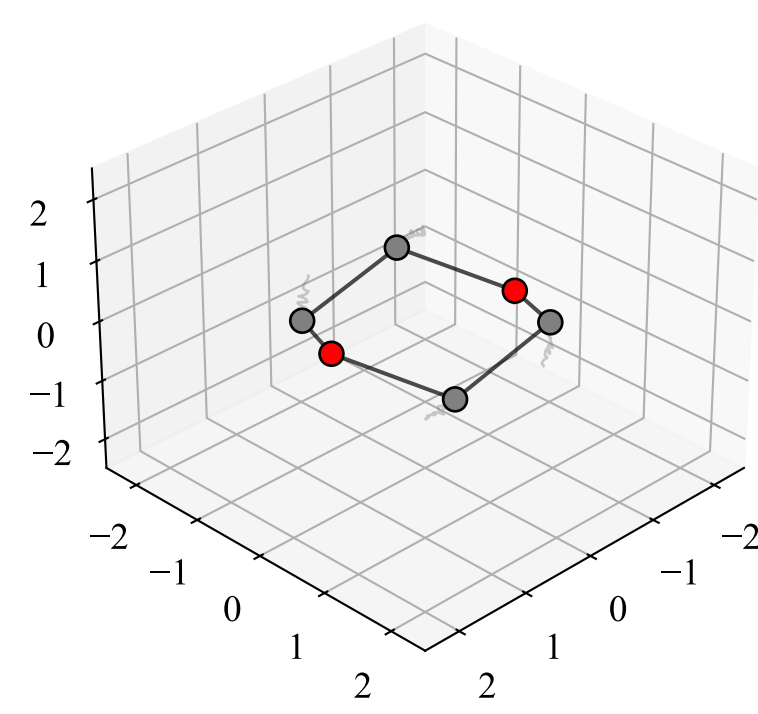

1,4-Dioxane

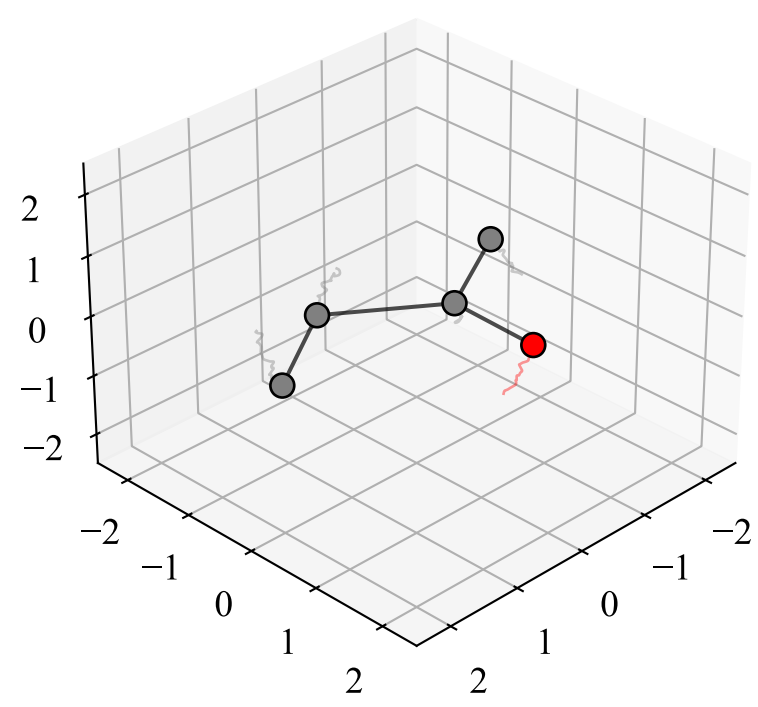

2-Butanone

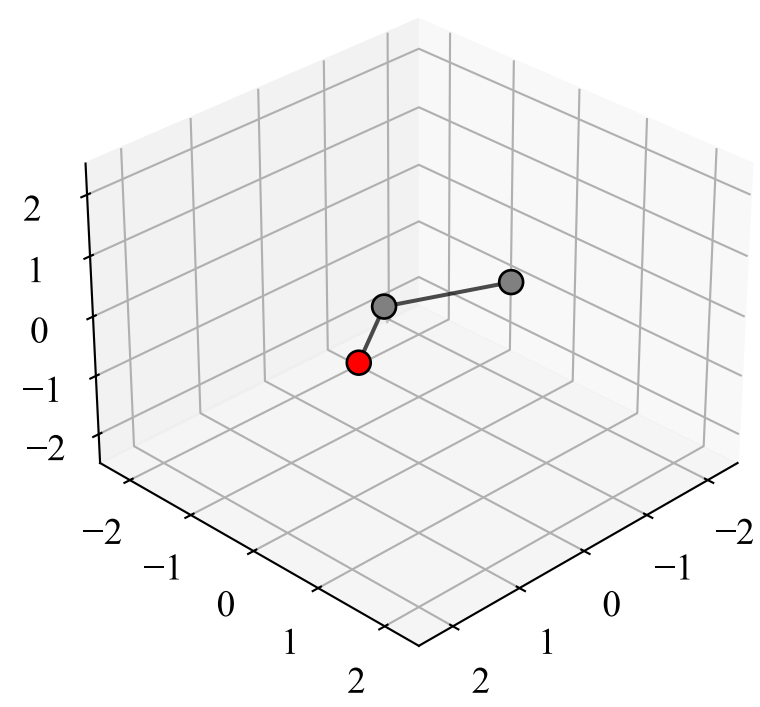

Acetaldehyde

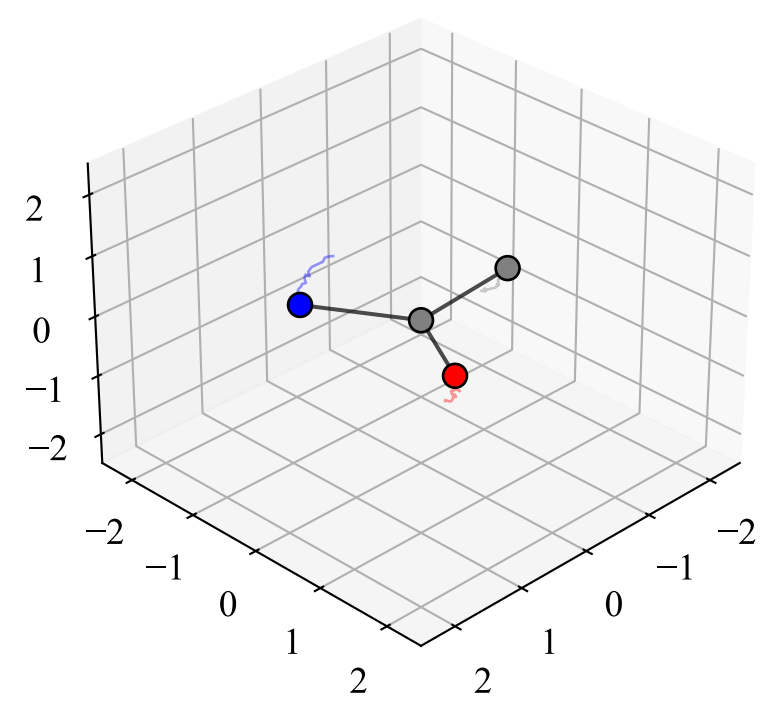

Acetamide

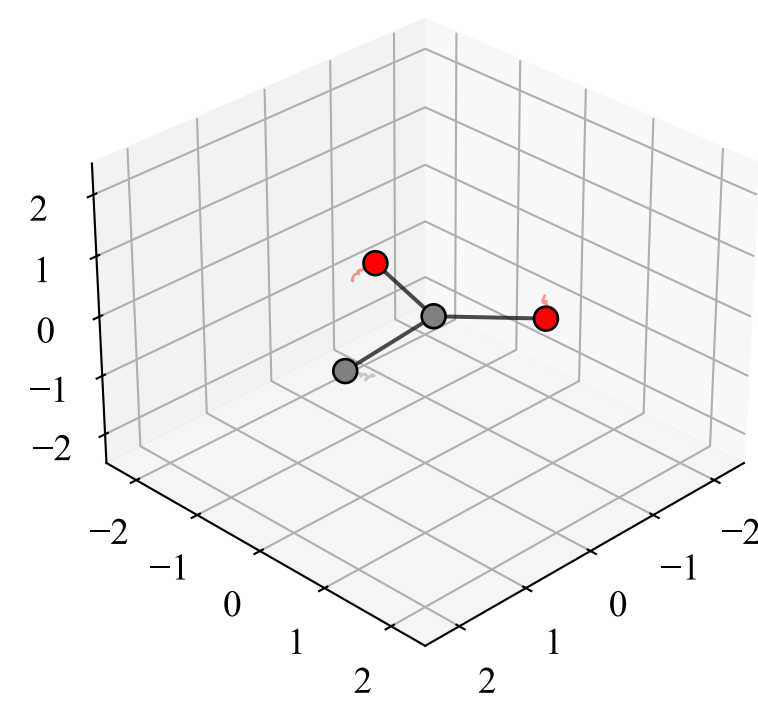

Acetic acid

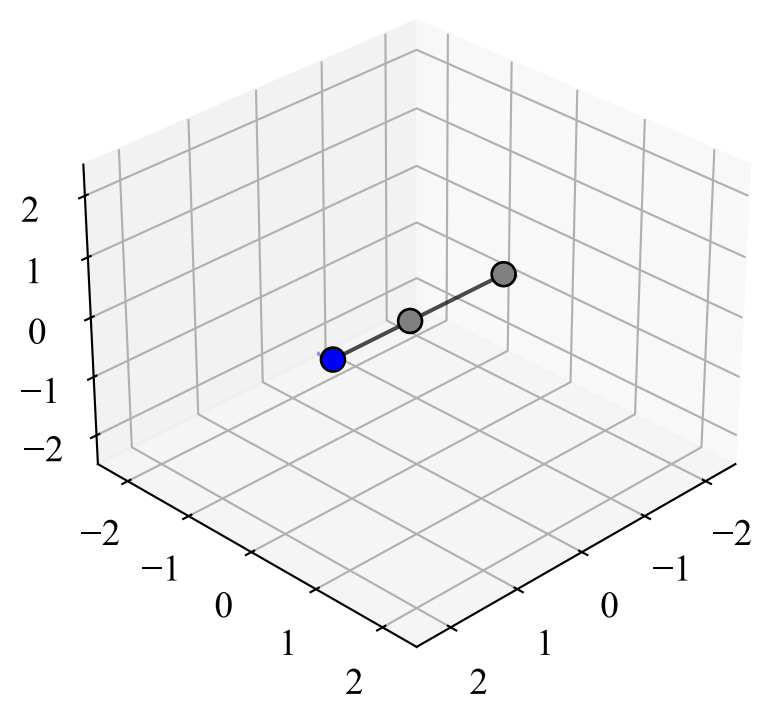

Acetonitrile

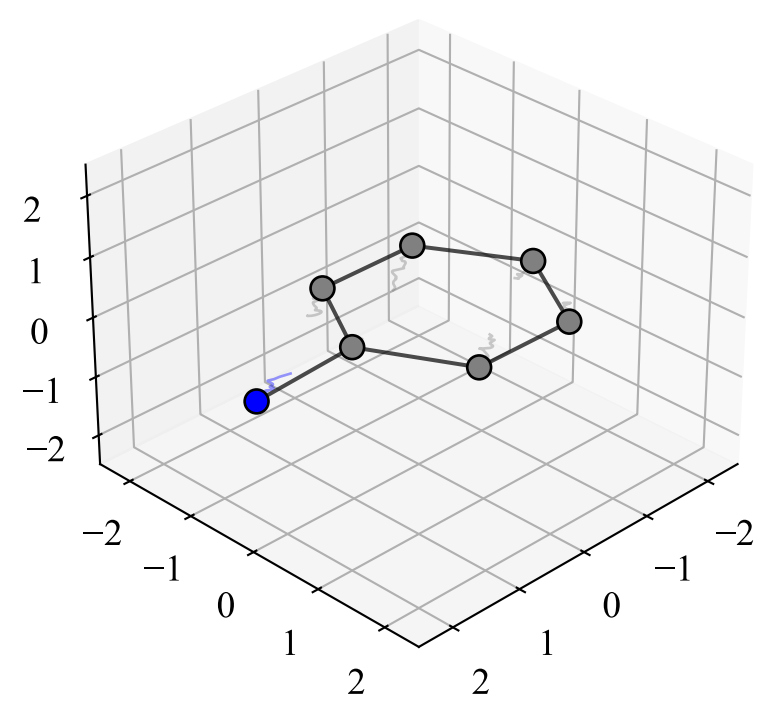

Aniline

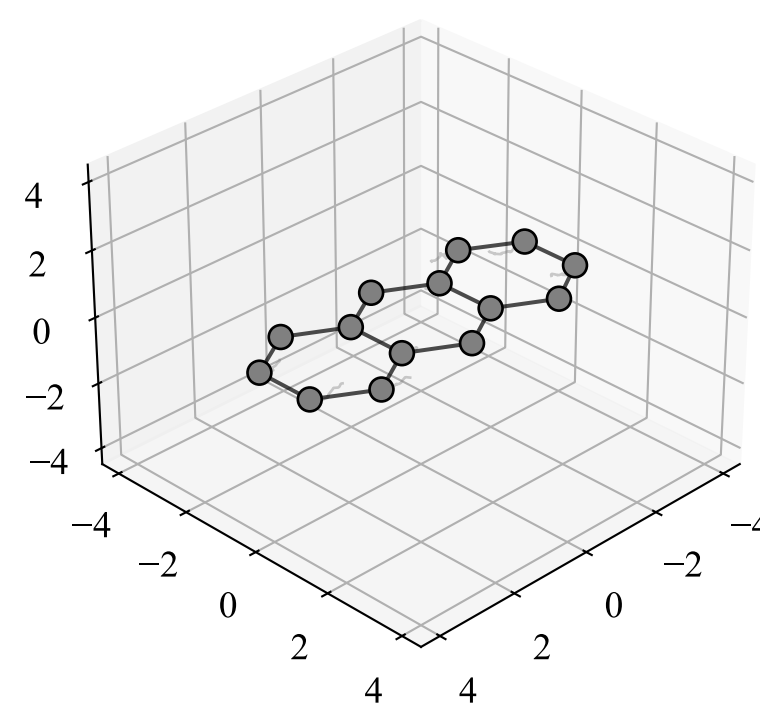

Anthracene

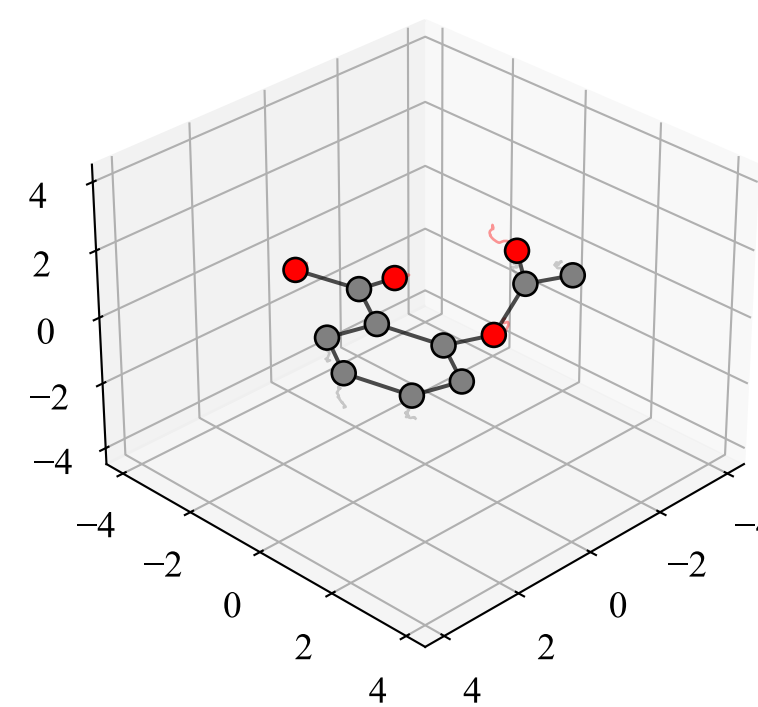

Aspirin

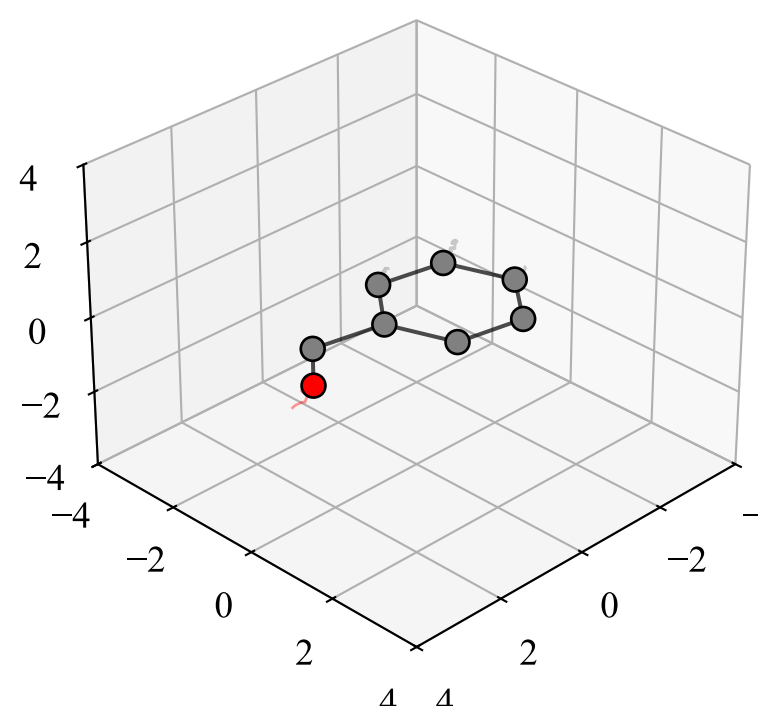

Benzaldehyde

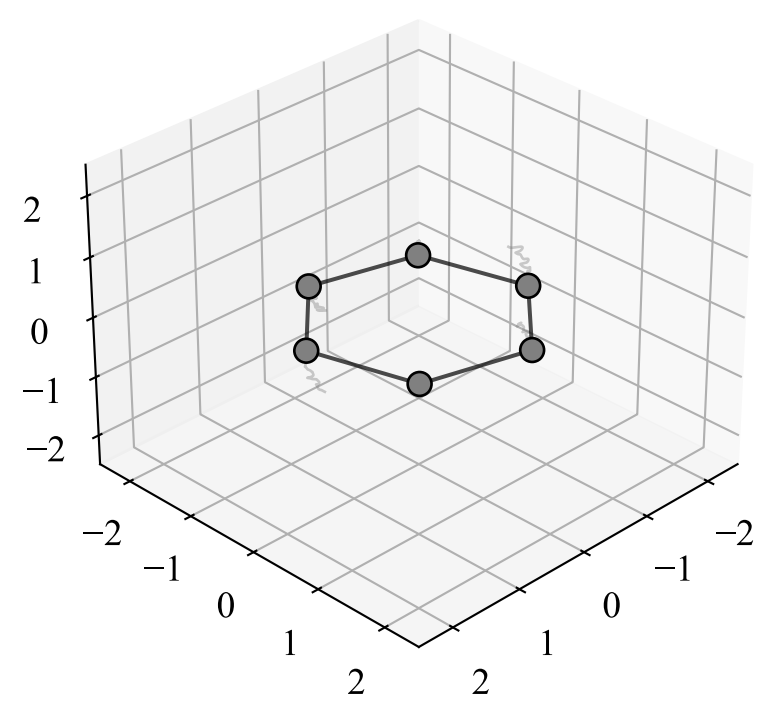

Benzene

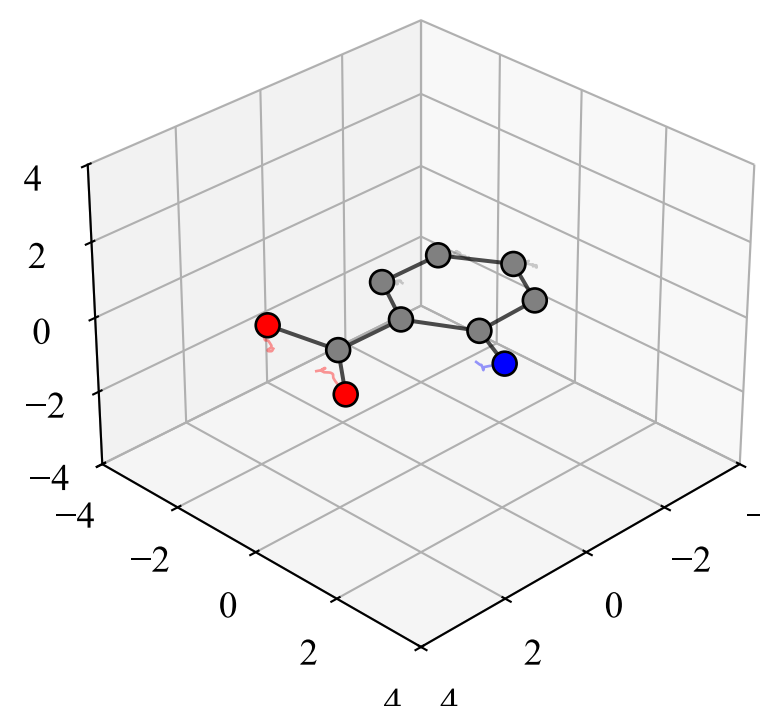

Benzene1

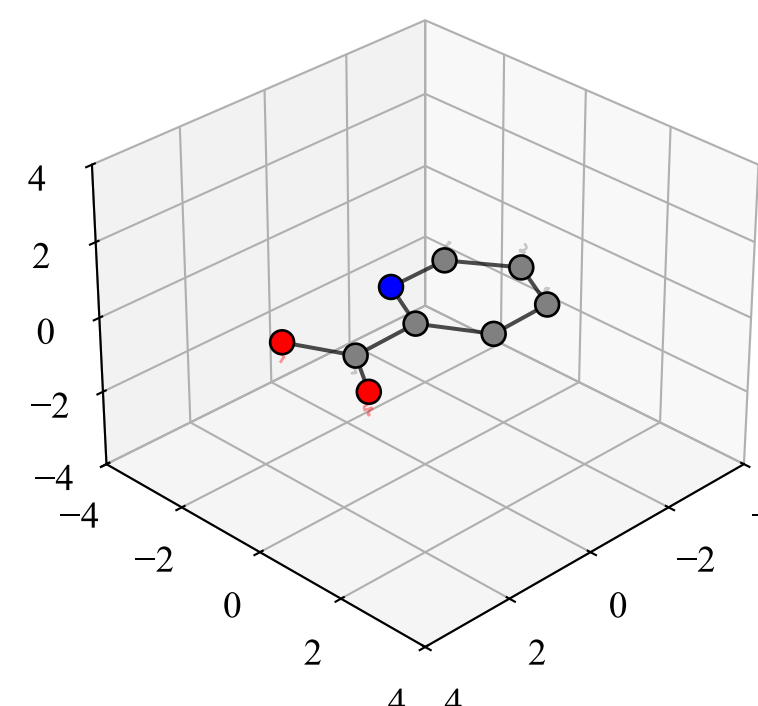

Benzene2

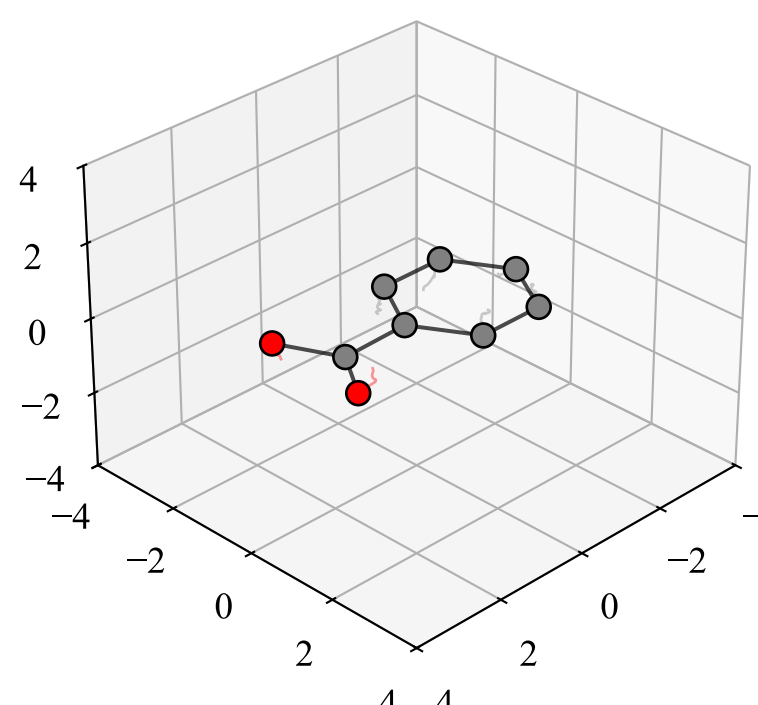

Benzoic acid

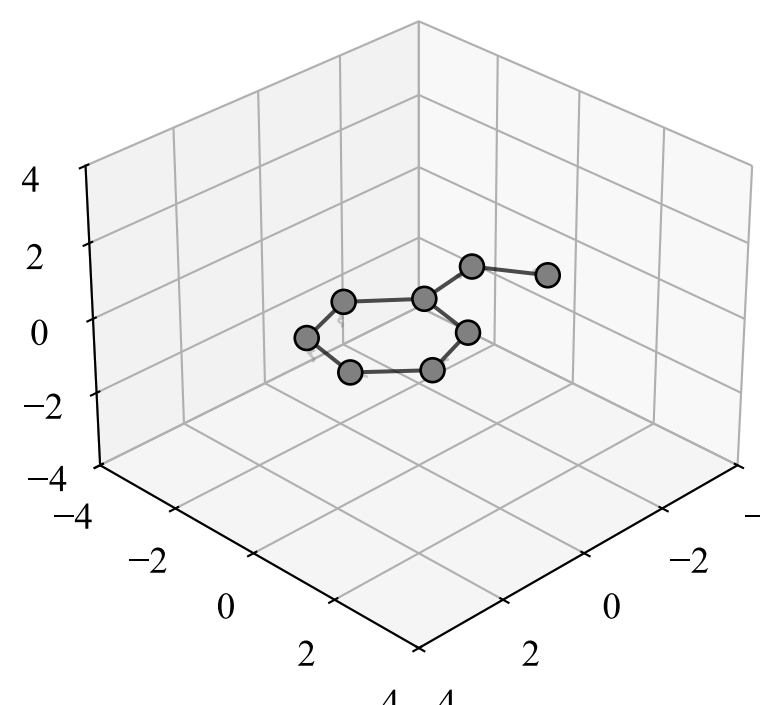

Benzothiophene

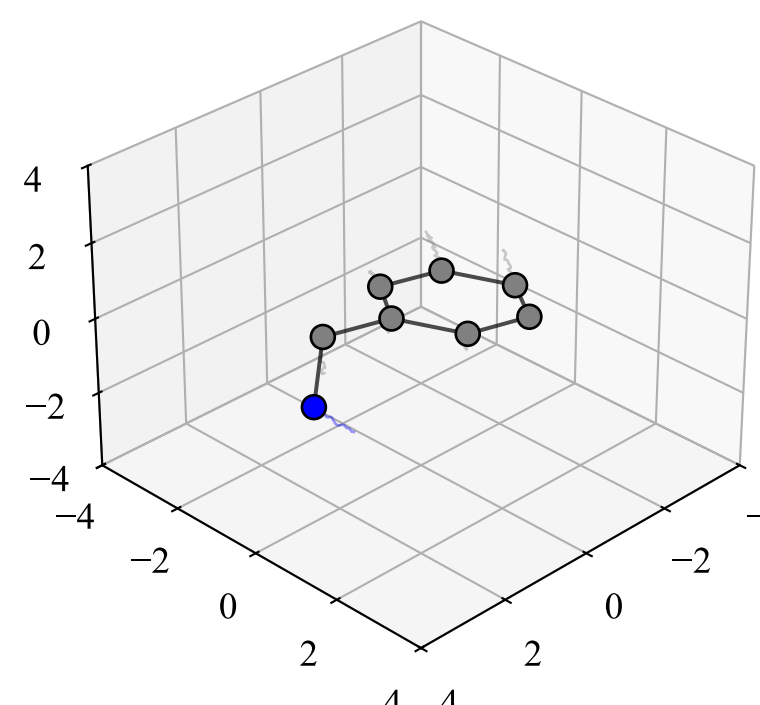

Benzylamine

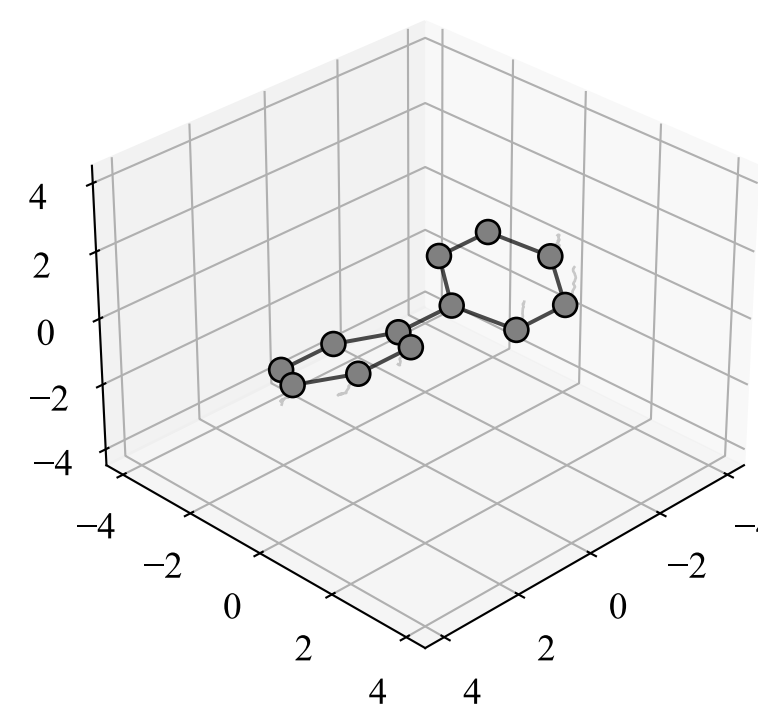

Biphenyl

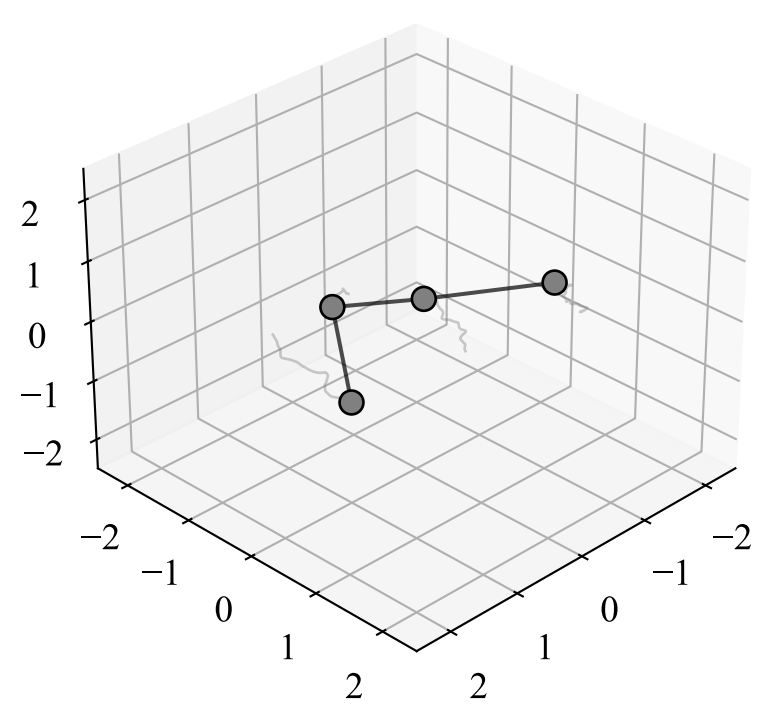

Butane

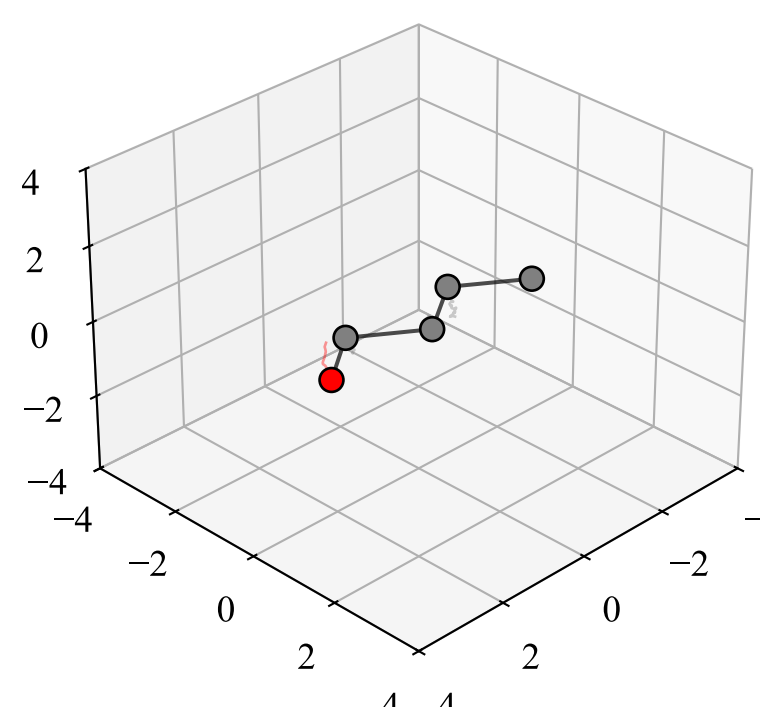

Butanol

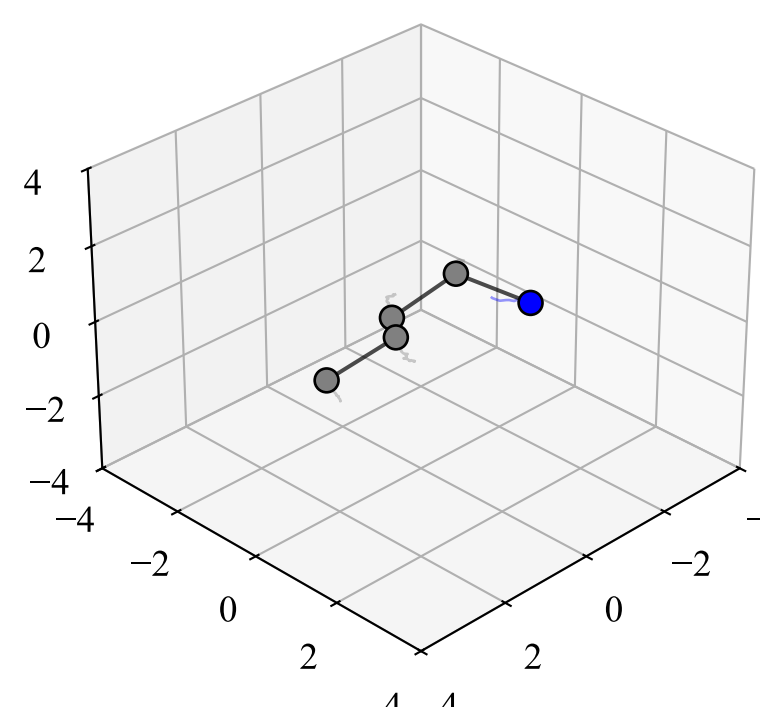

Butylamine

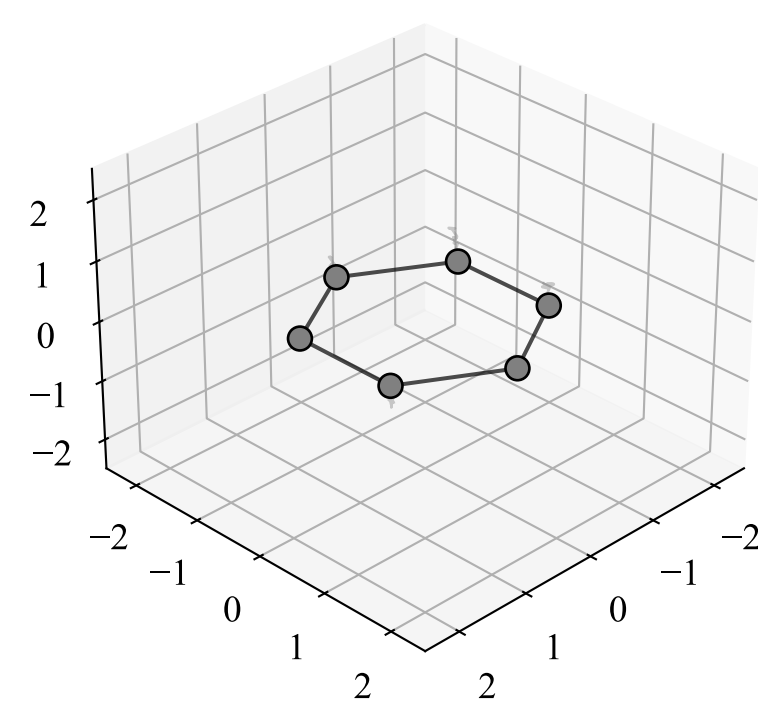

Chlorobenzene
