# Supplementary material
Source: ML conference proceedings conference paper supplement (https://openreview.net/forum?id=e9cV4xSjbR)
Supplement: supplementary_material [file tg80_combined_trajectories_2.pdf › Z_paper_content/trajectories/tg80_combined_trajectories_2.pdf]

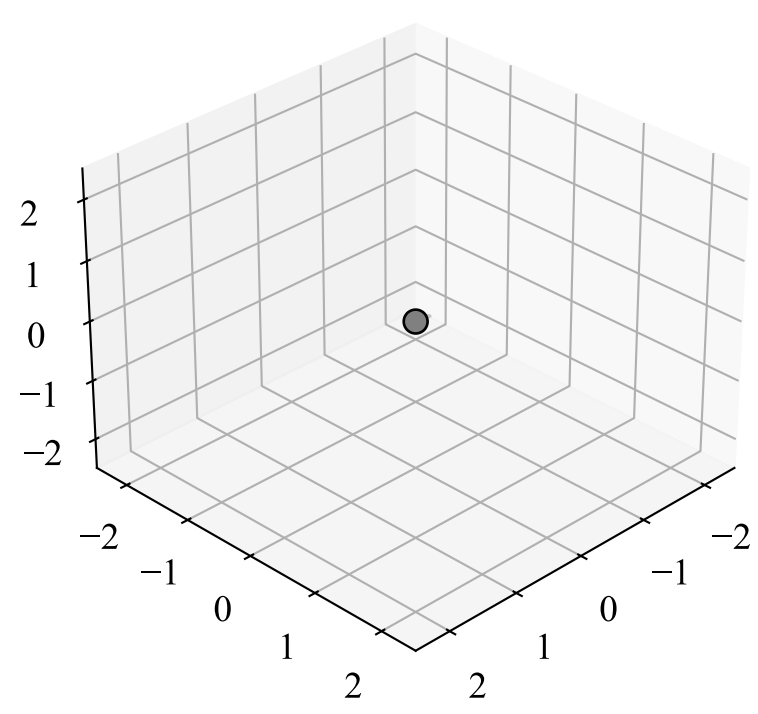

Chloroform

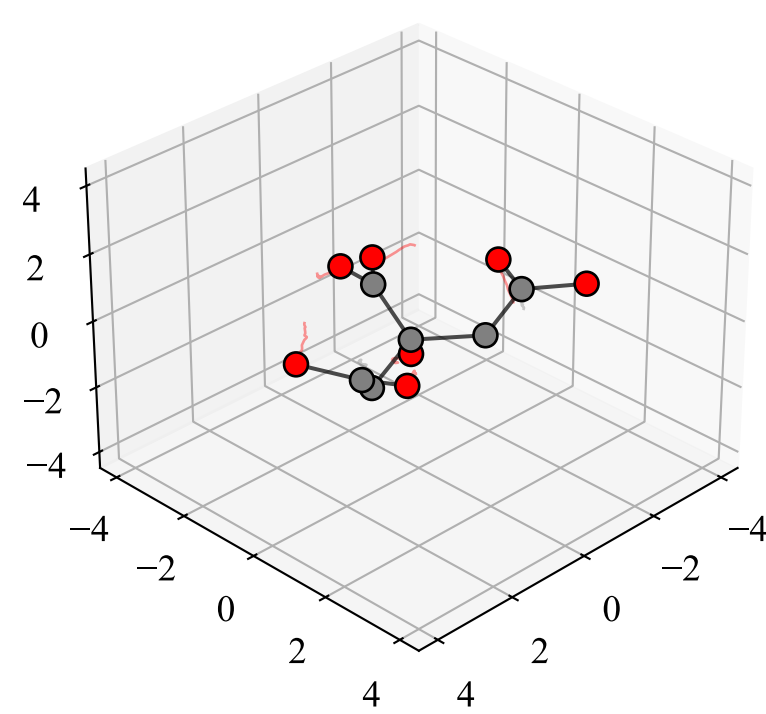

Citricacid

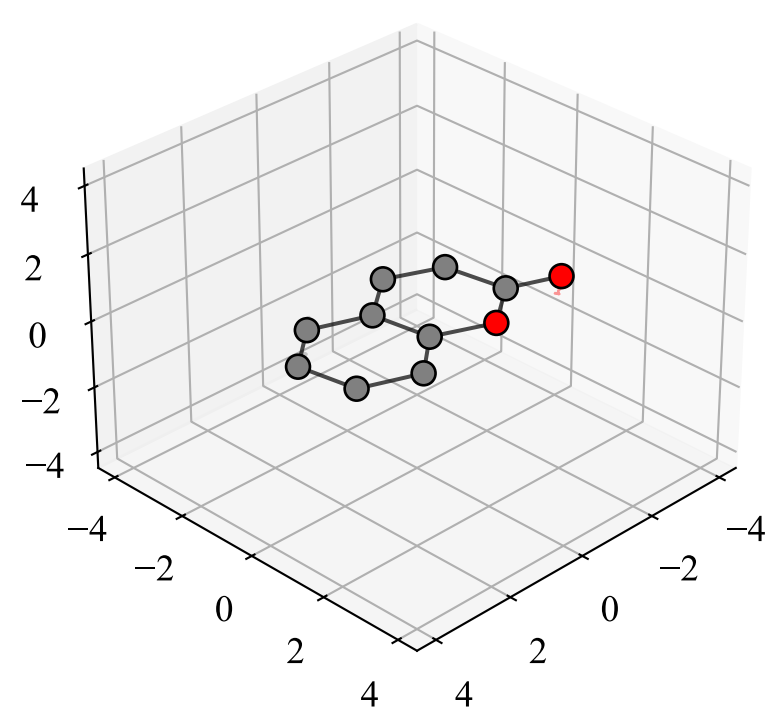

Coumarin

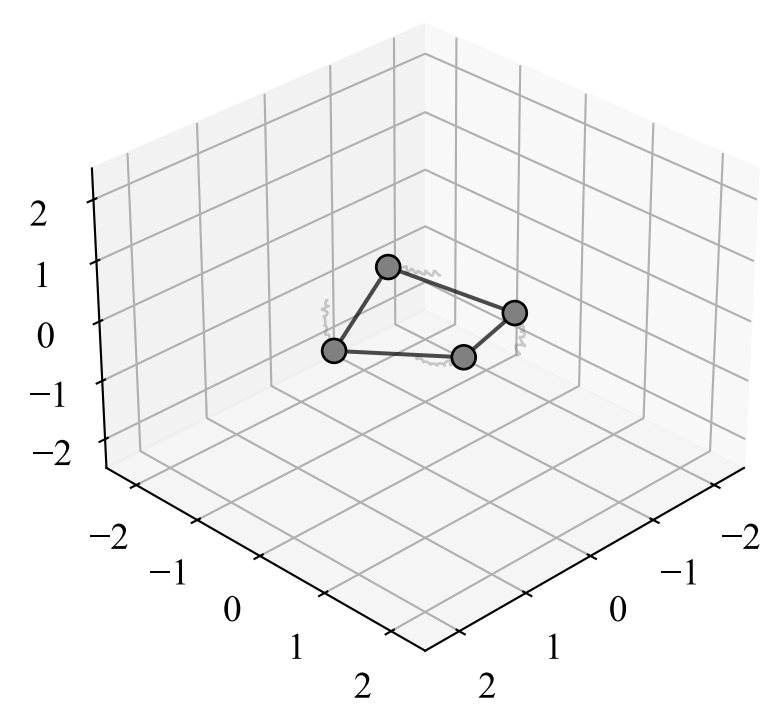

Cyclobutane

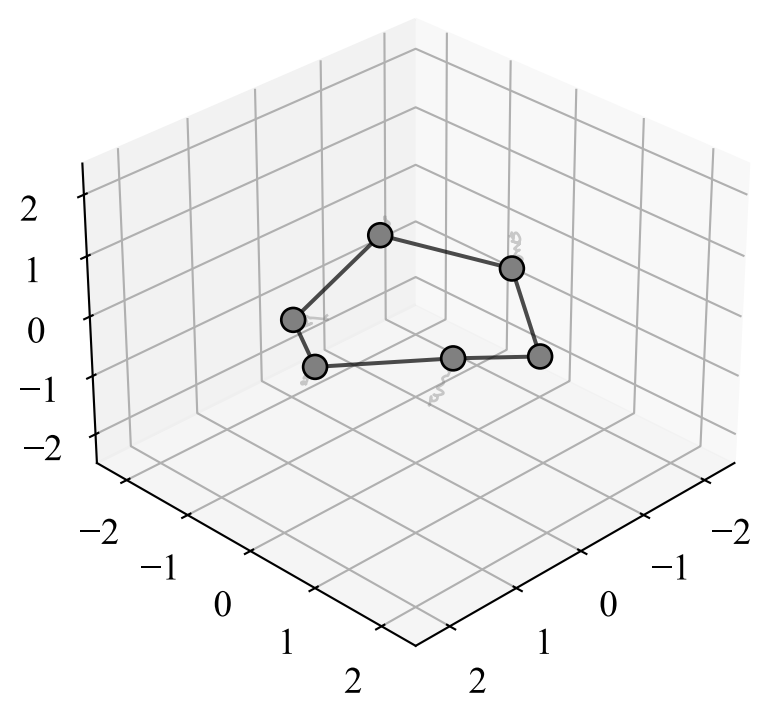

Cyclohexane

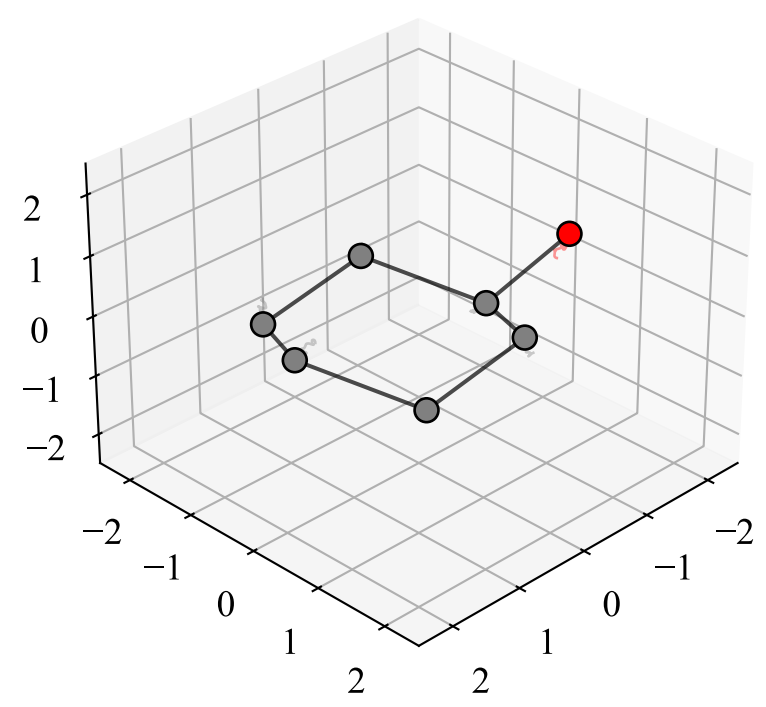

Cyclohexanol

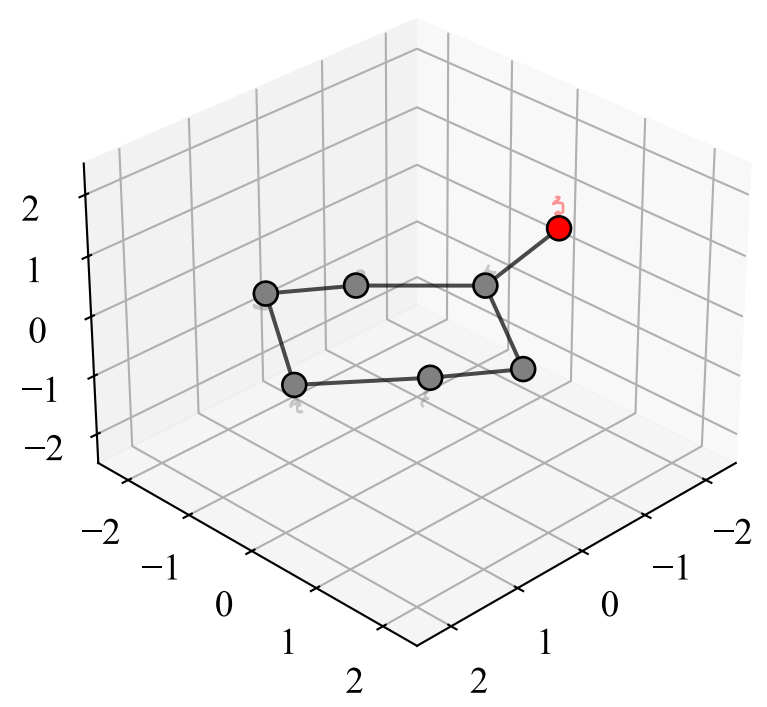

Cyclohexanone

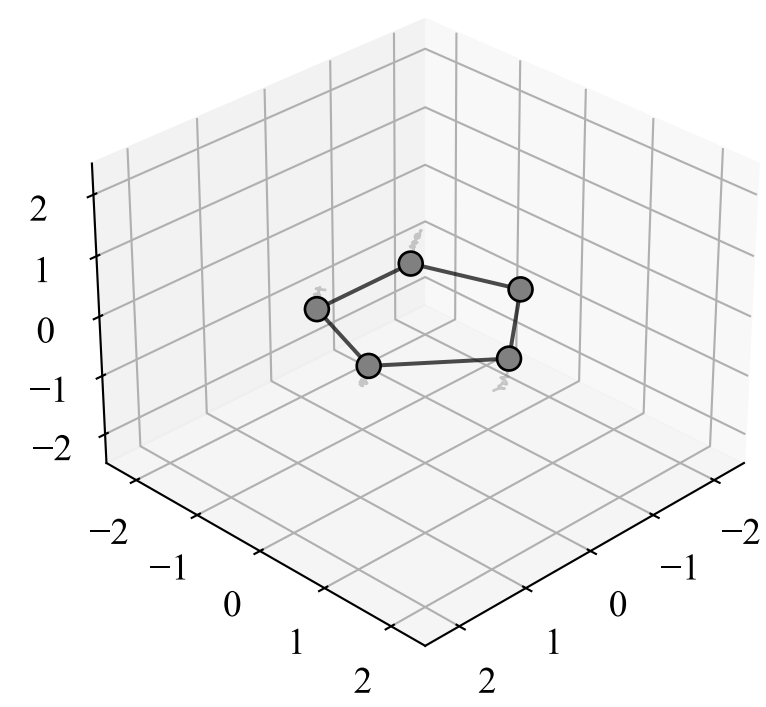

Cyclopentadiene

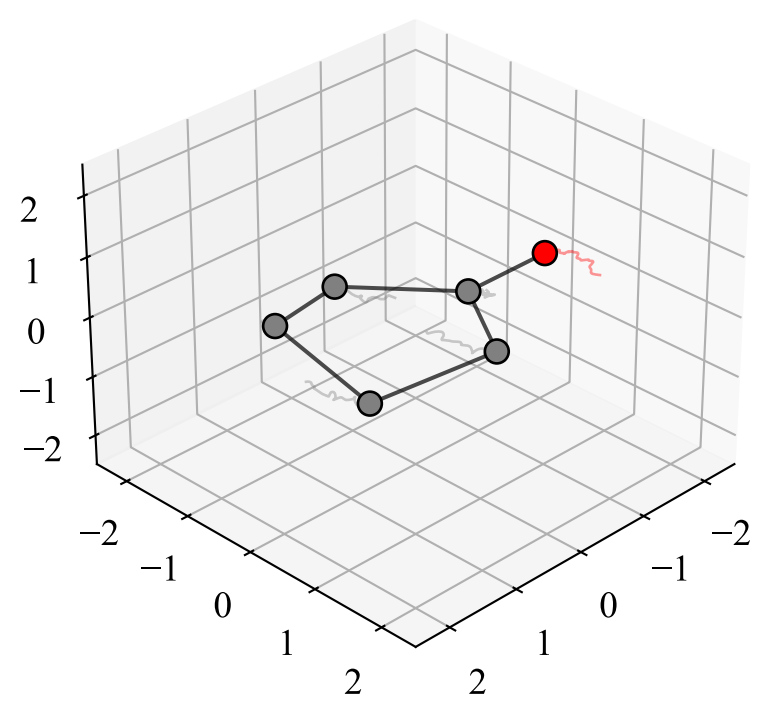

Cyclopentanone

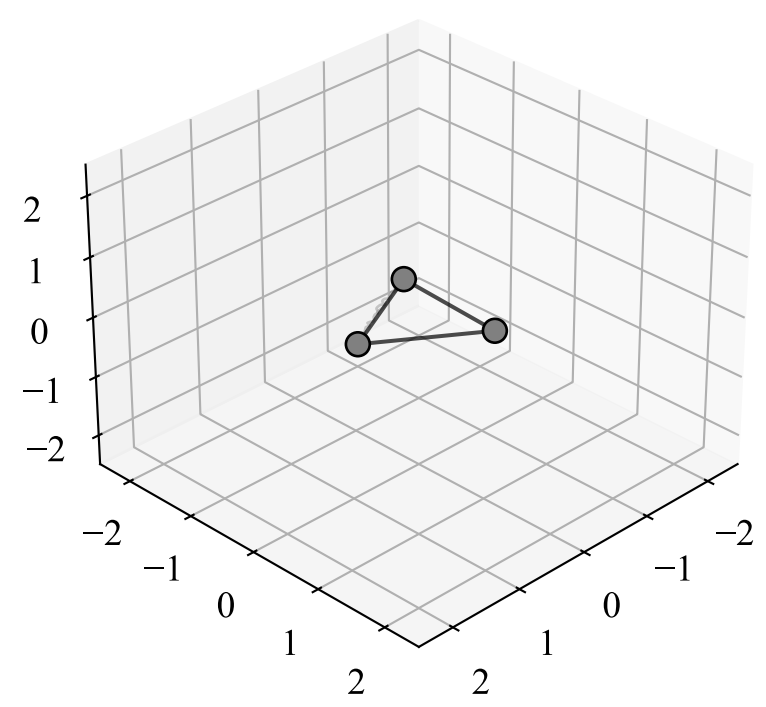

Cyclopropane

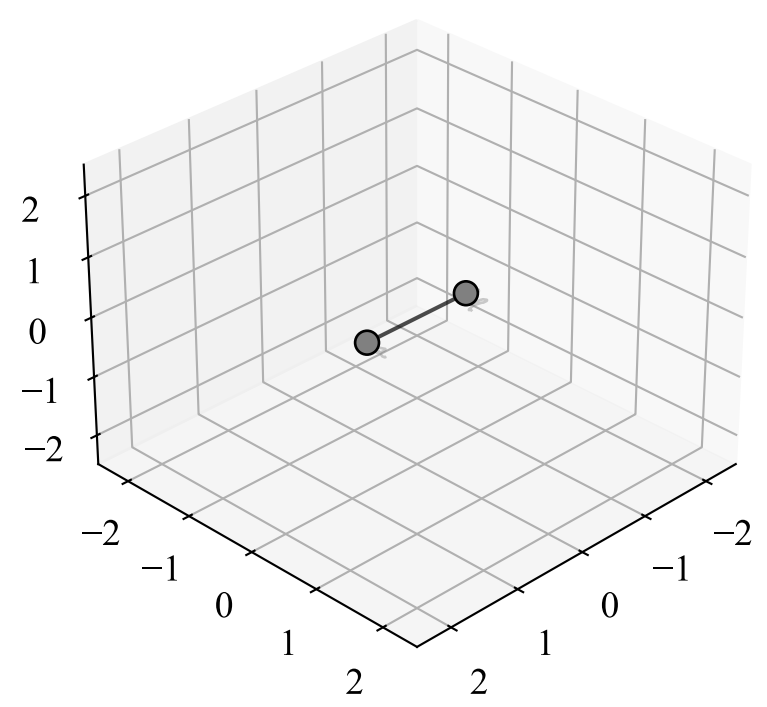

Ethanethiol

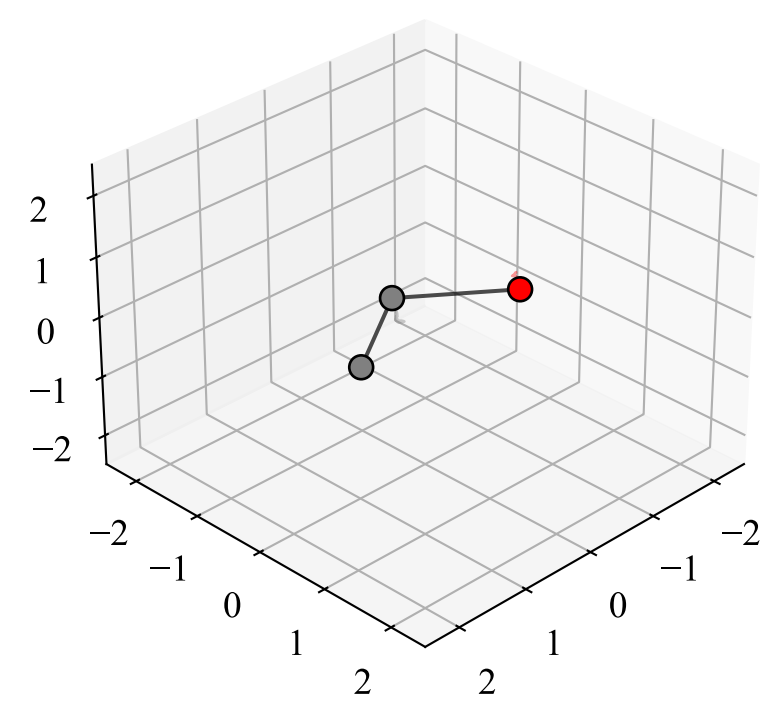

Ethanol

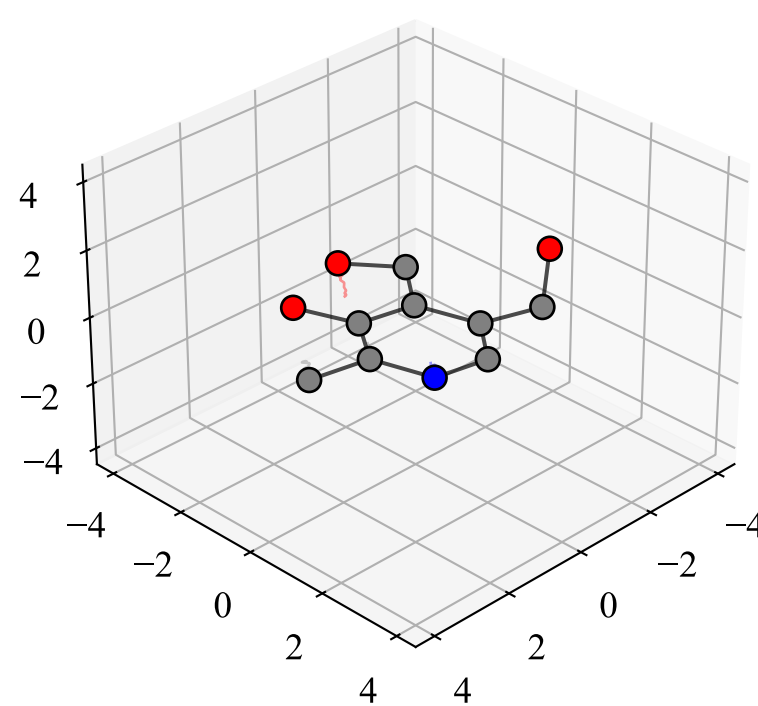

Ethanol1

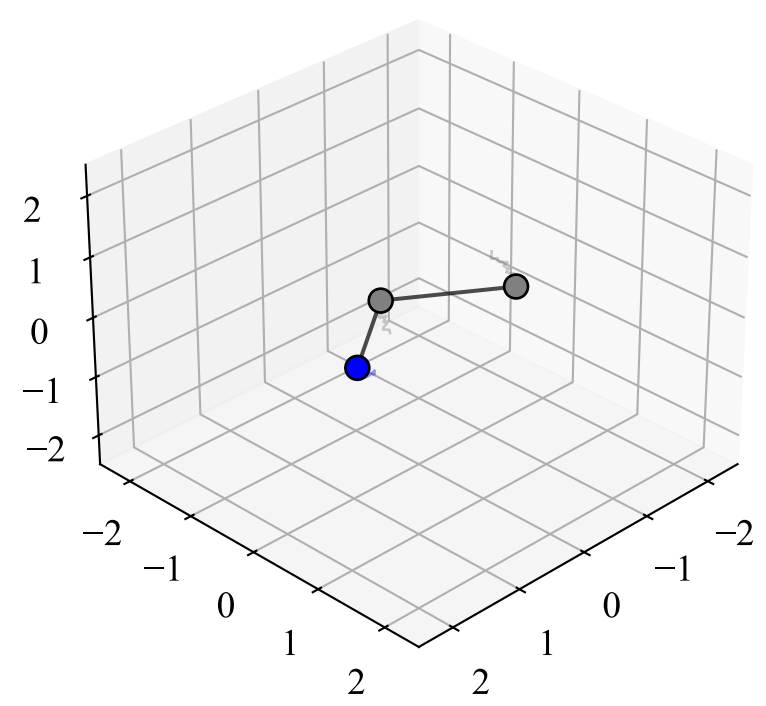

Ethylamine

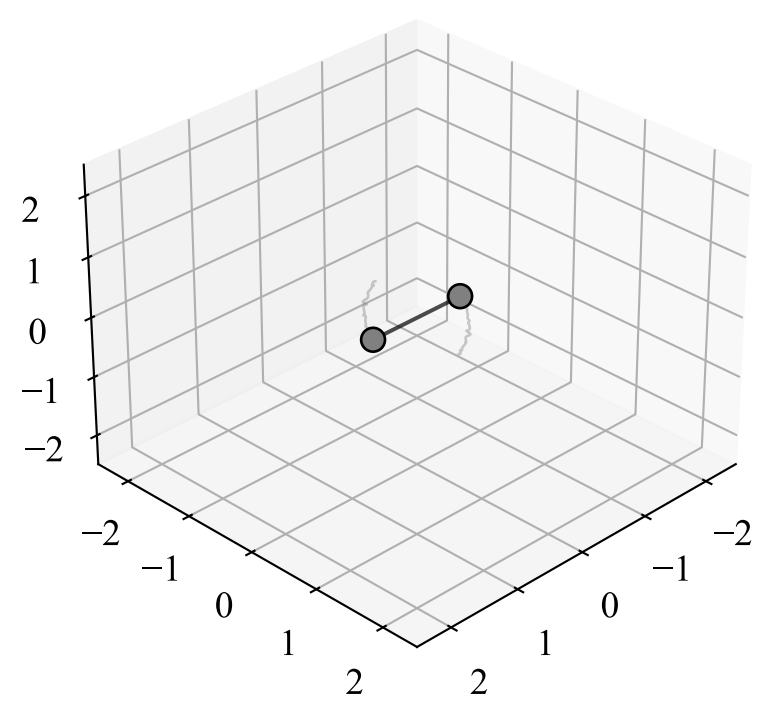

Ethylene

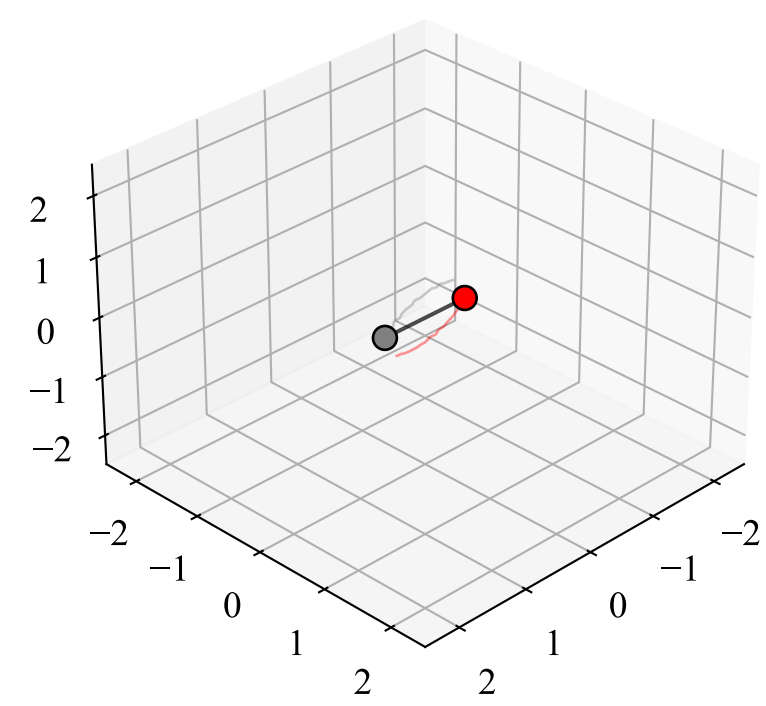

Formaldehyde

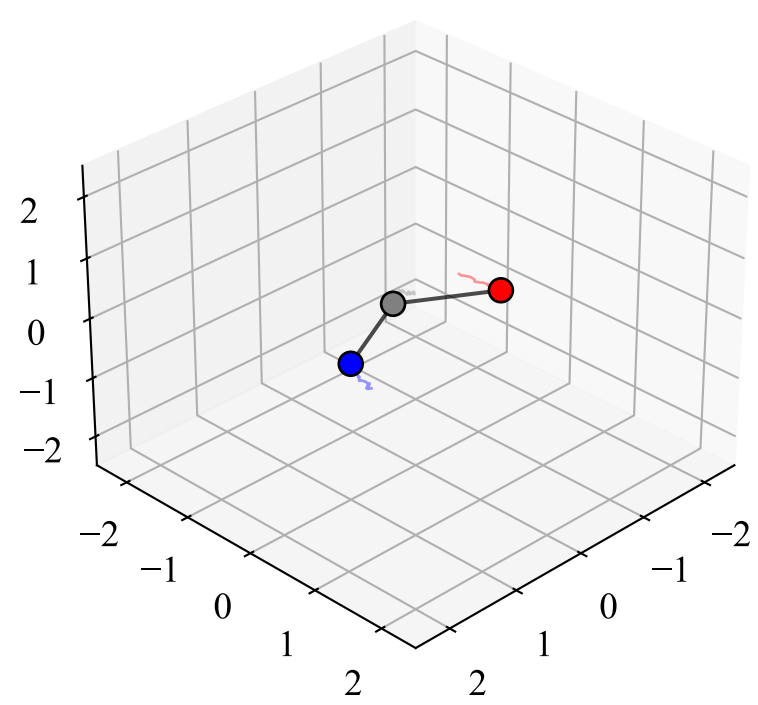

Formamide

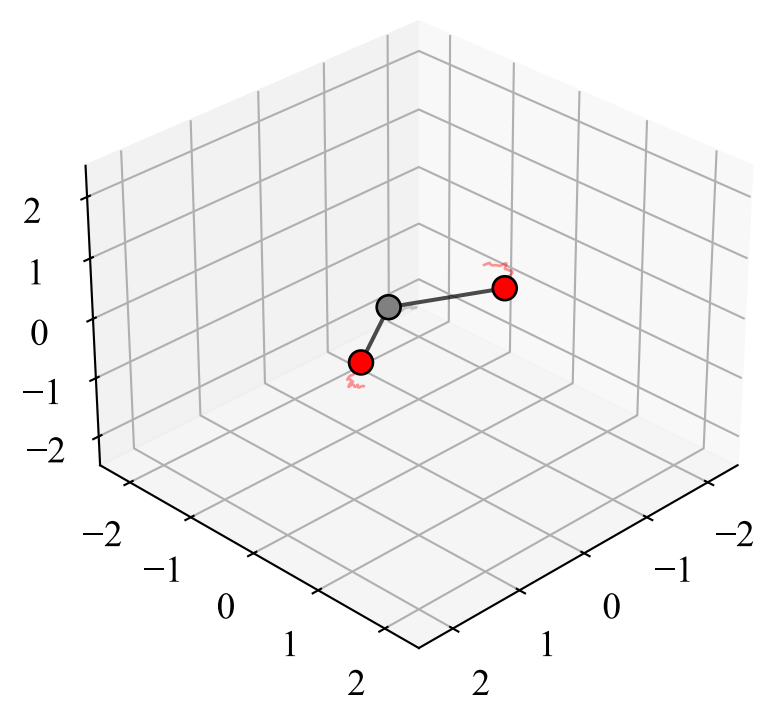

Formicacid

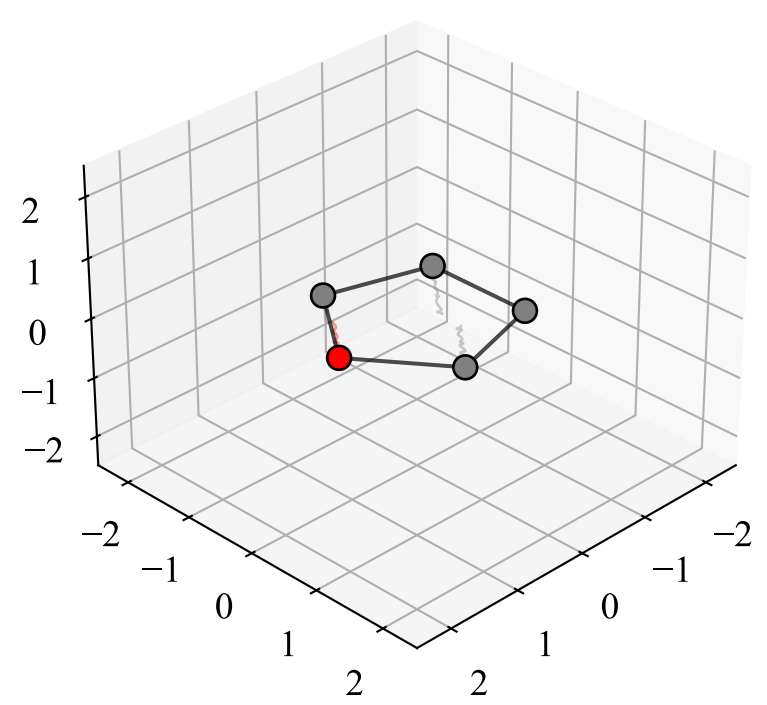

Furan

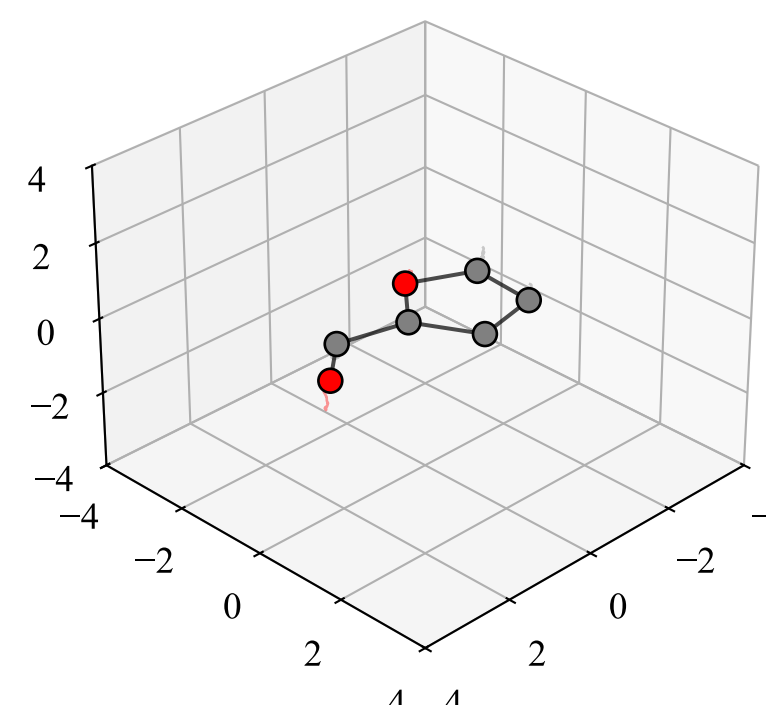

Furfural

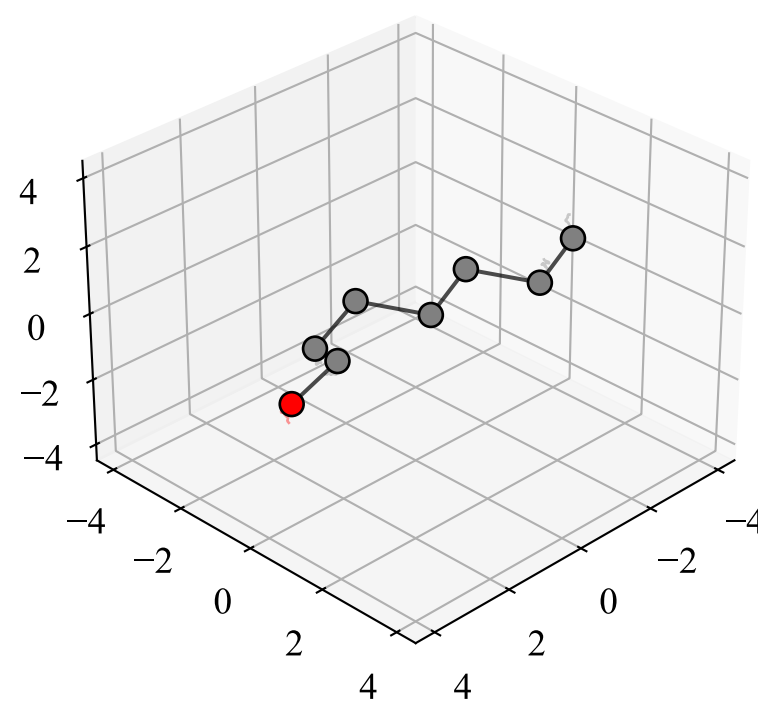

Heptanol

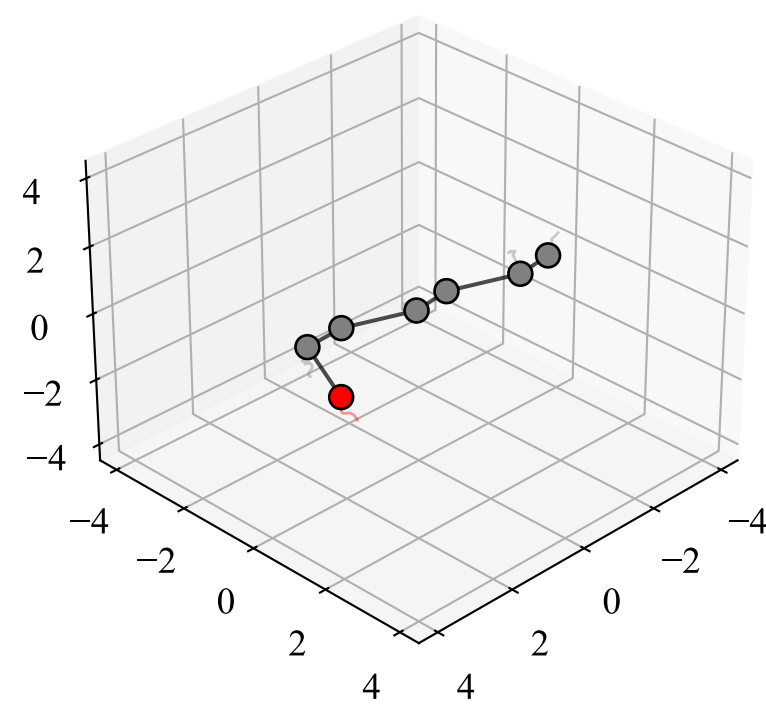

Hexanol

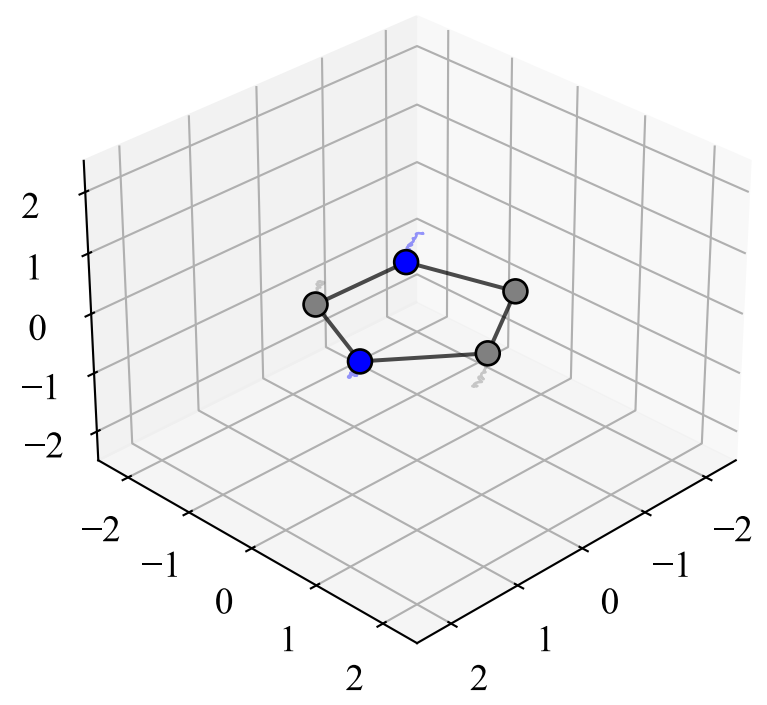

Imidazole

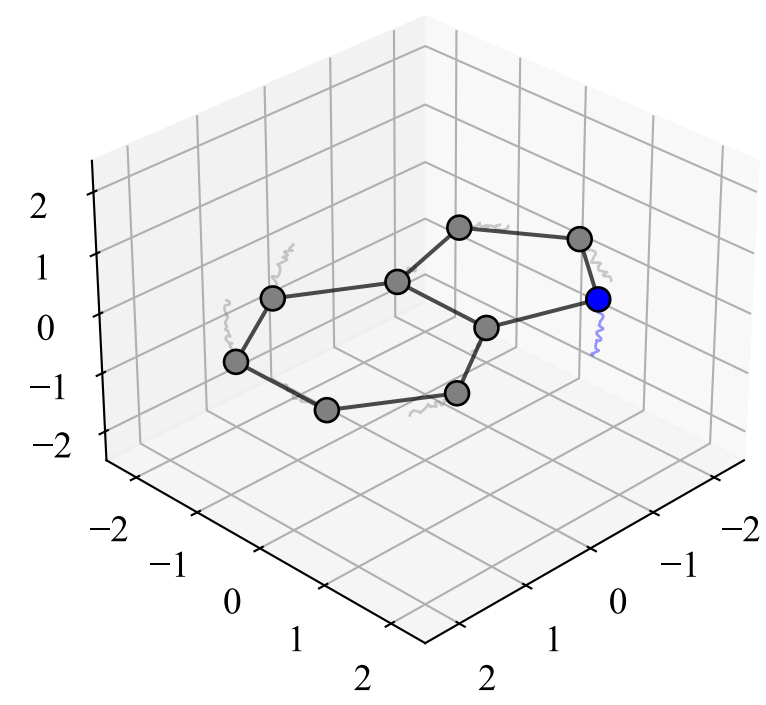

Indole
