# Supplementary material
Source: ML conference proceedings conference paper supplement (https://openreview.net/forum?id=e9cV4xSjbR)
Supplement: supplementary_material [file tg80_combined_trajectories_3.pdf › Z_paper_content/trajectories/tg80_combined_trajectories_3.pdf]

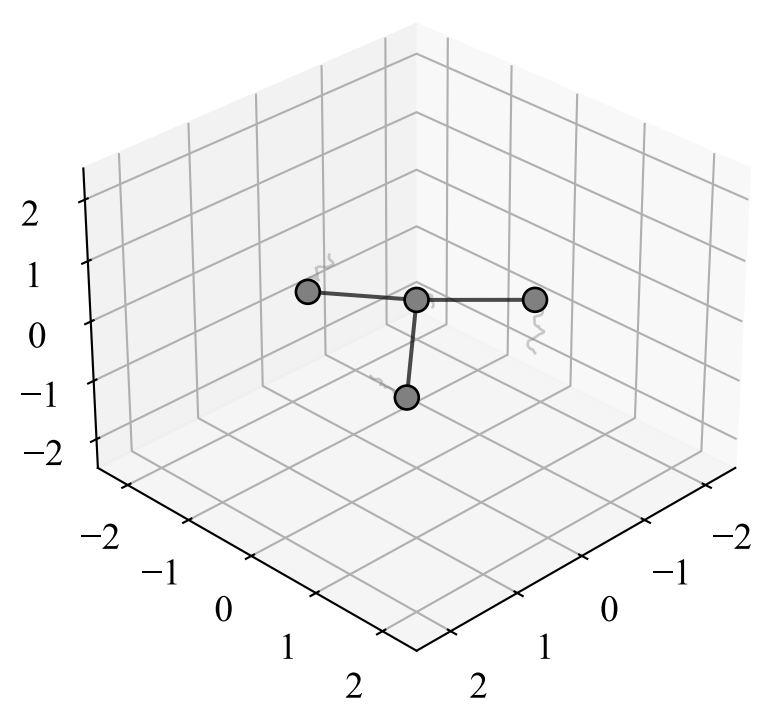

Isobutane

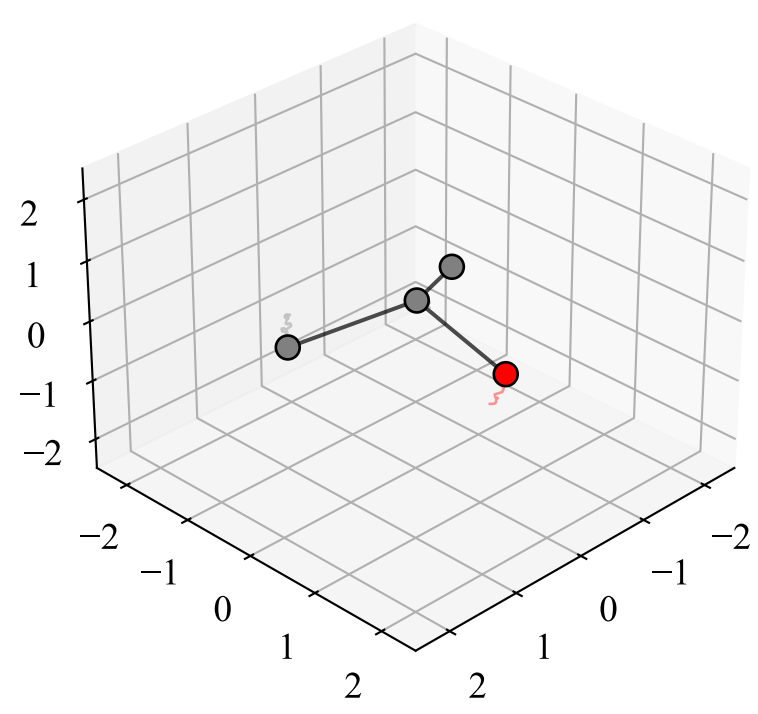

Isopropanol

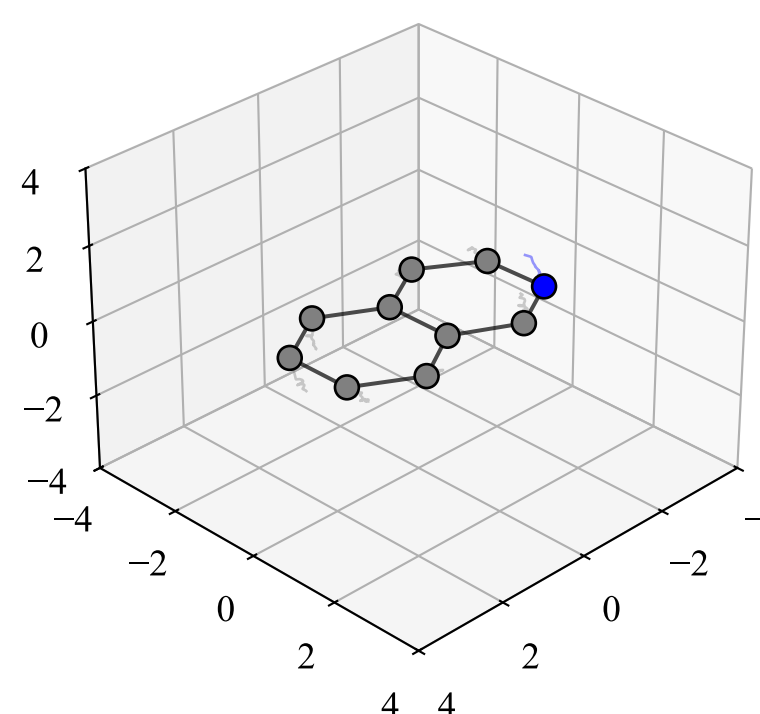

Isoquinoline

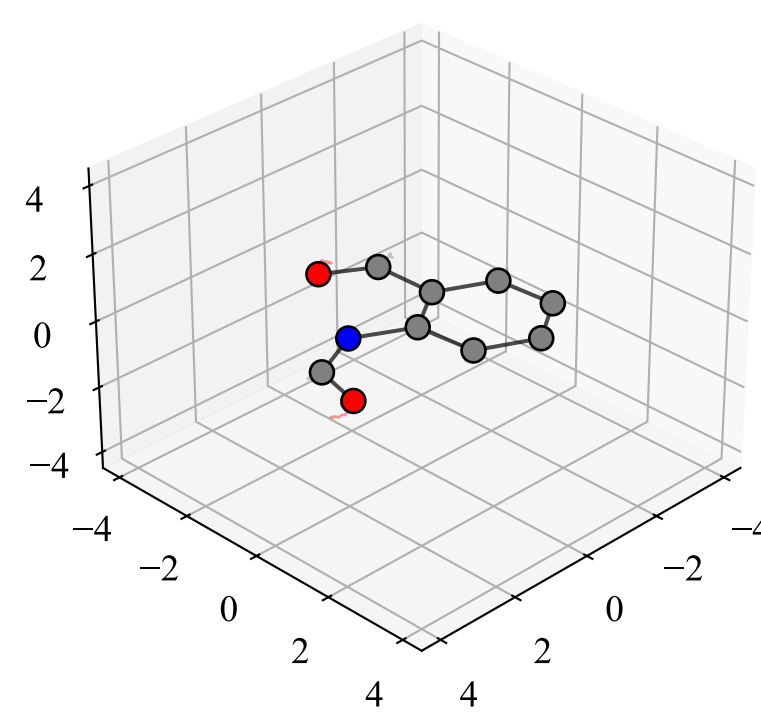

Malondialdehyde1

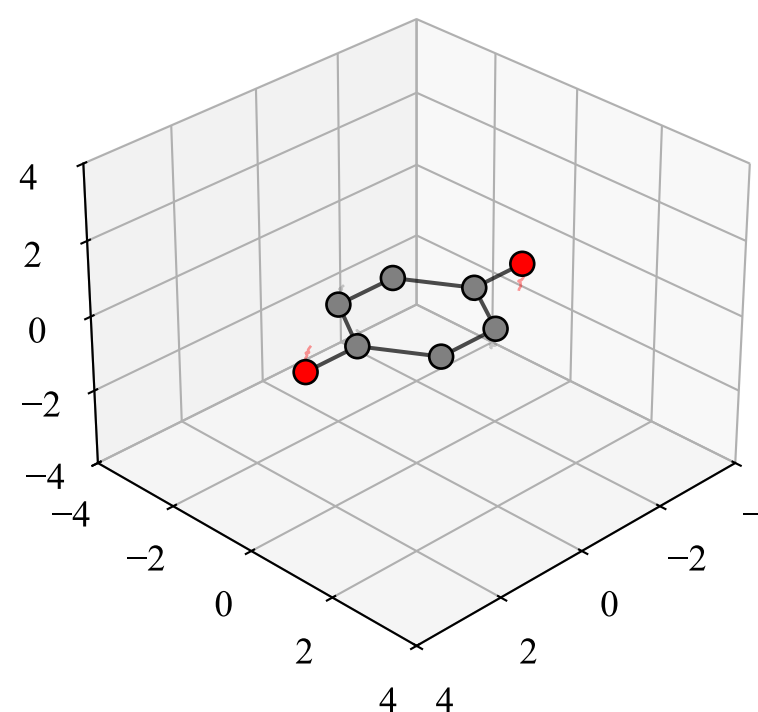

Malondialdehyde2

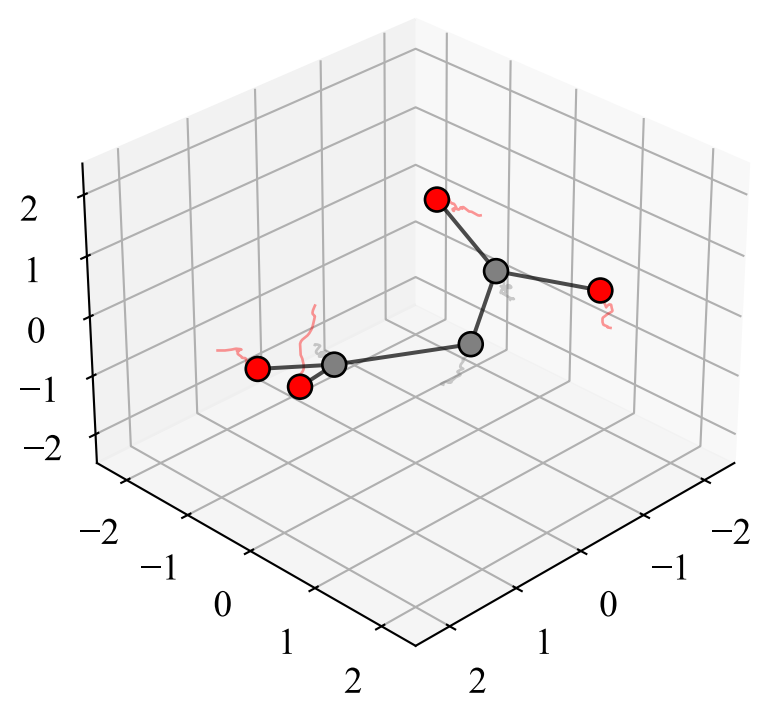

Malonicacid

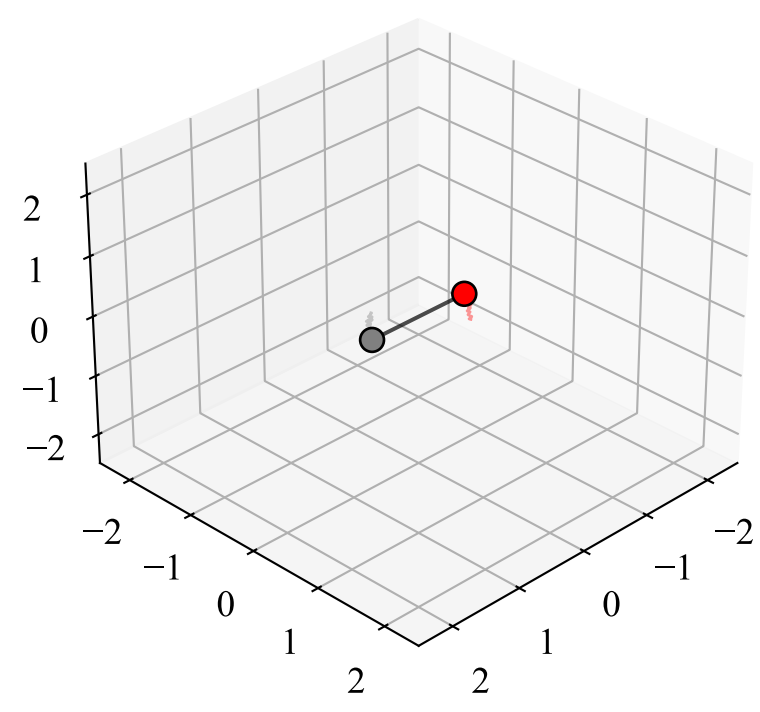

Methanol

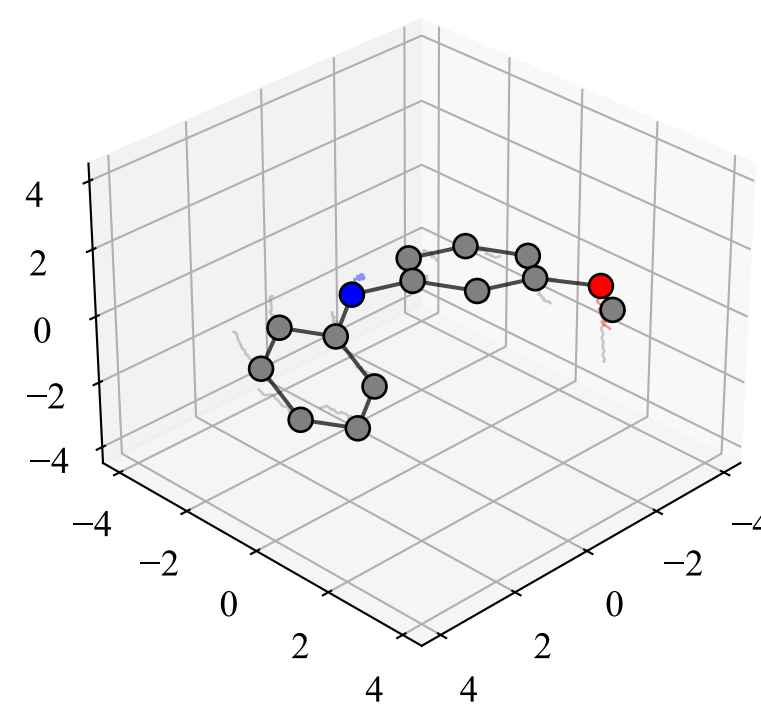

Naphthalene

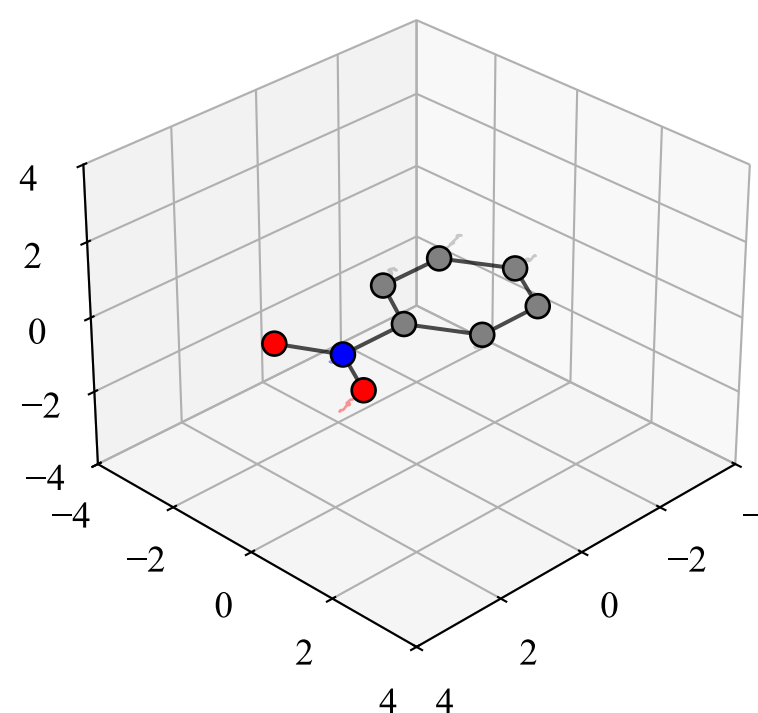

Nitrobenzene

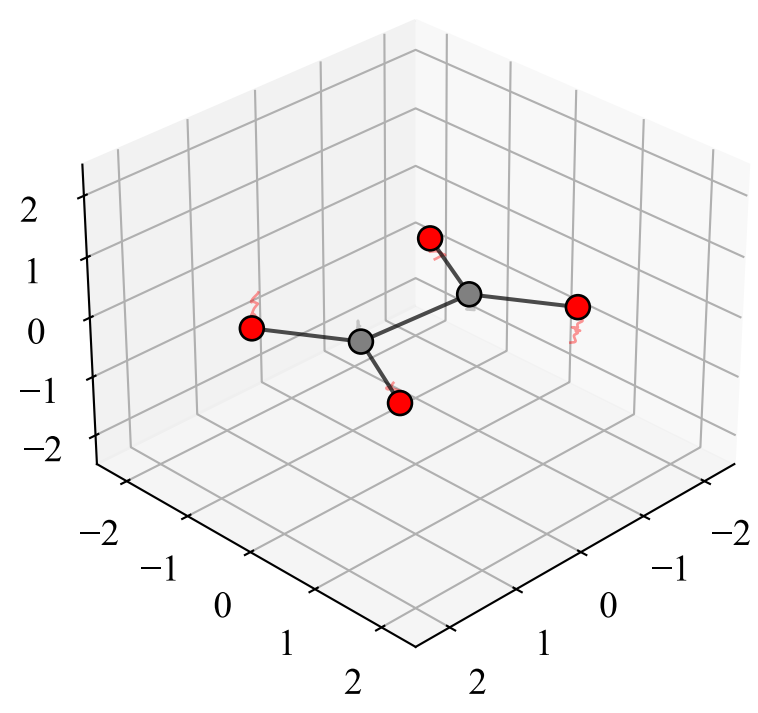

Oxalicacid

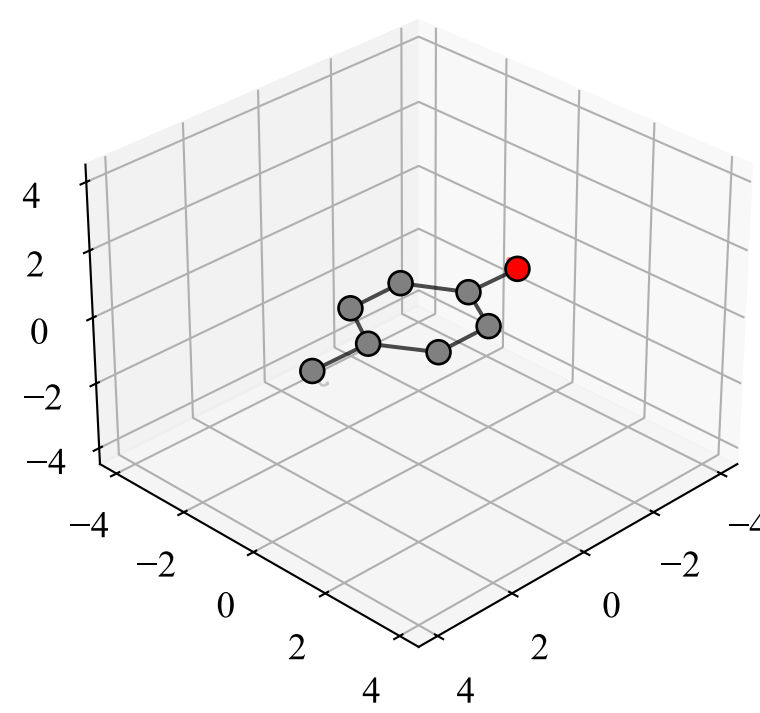

P-Cresol

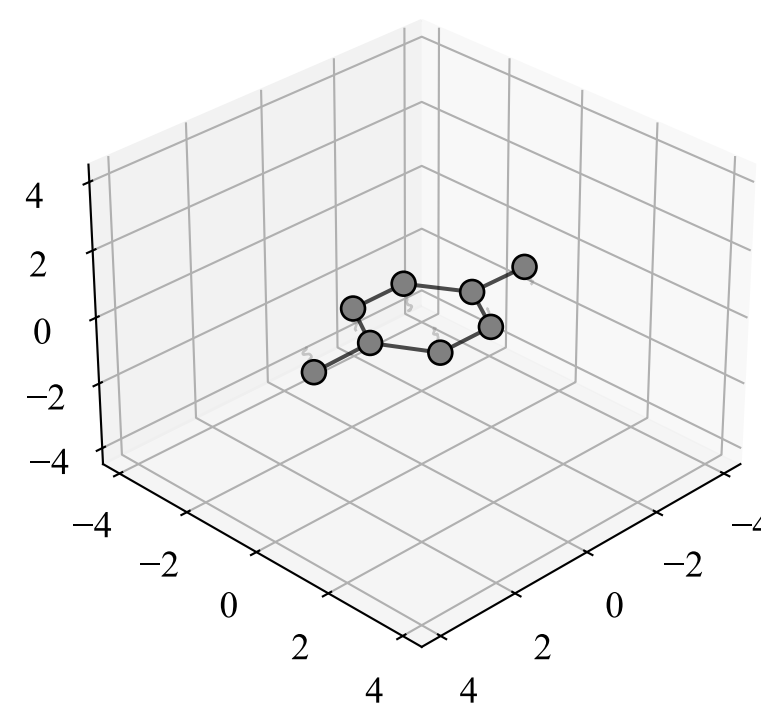

P-Xylene

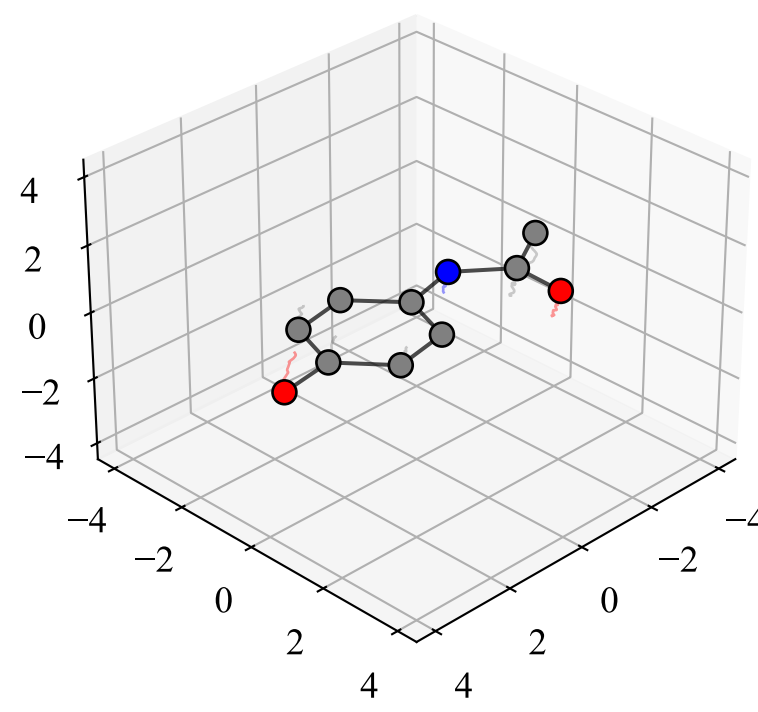

Paracetamol

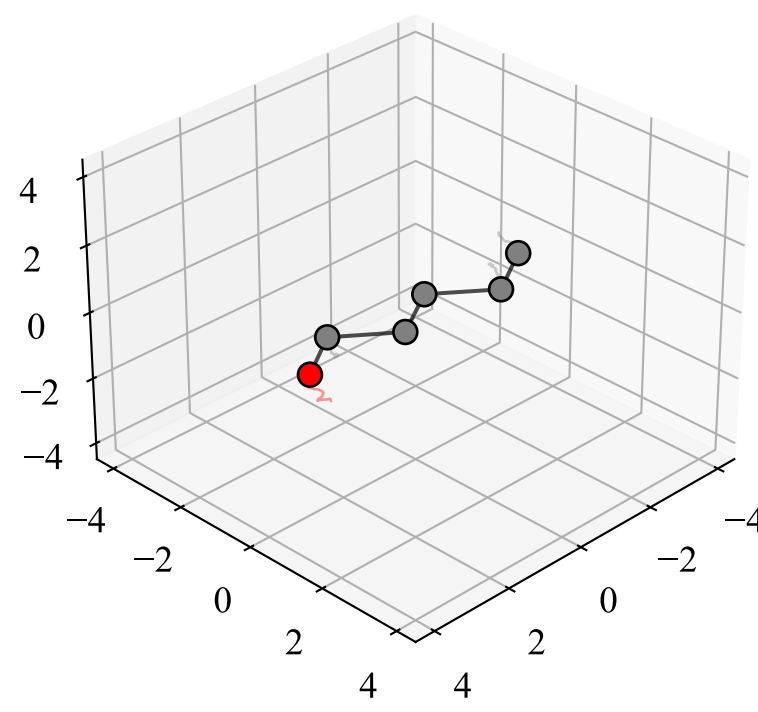

Pentanol

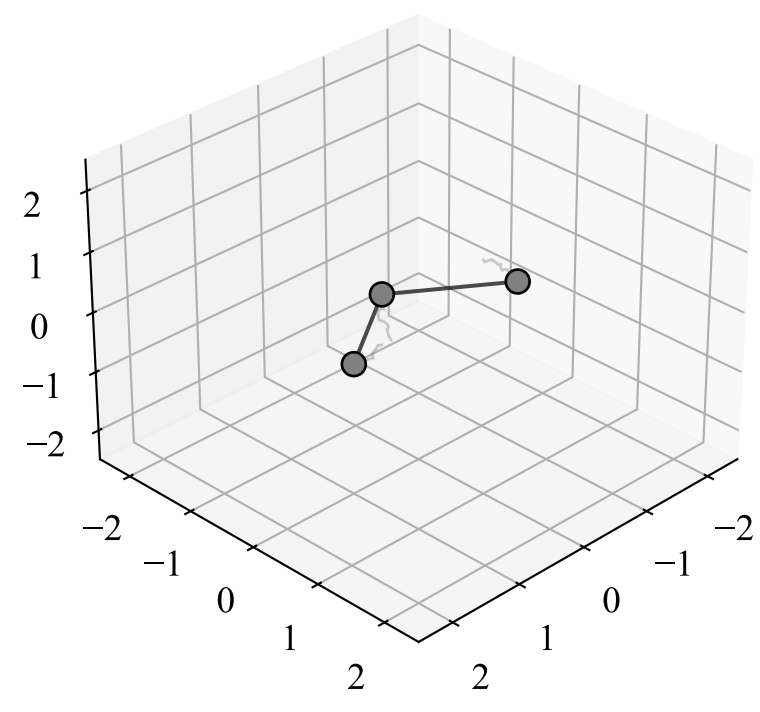

Propane

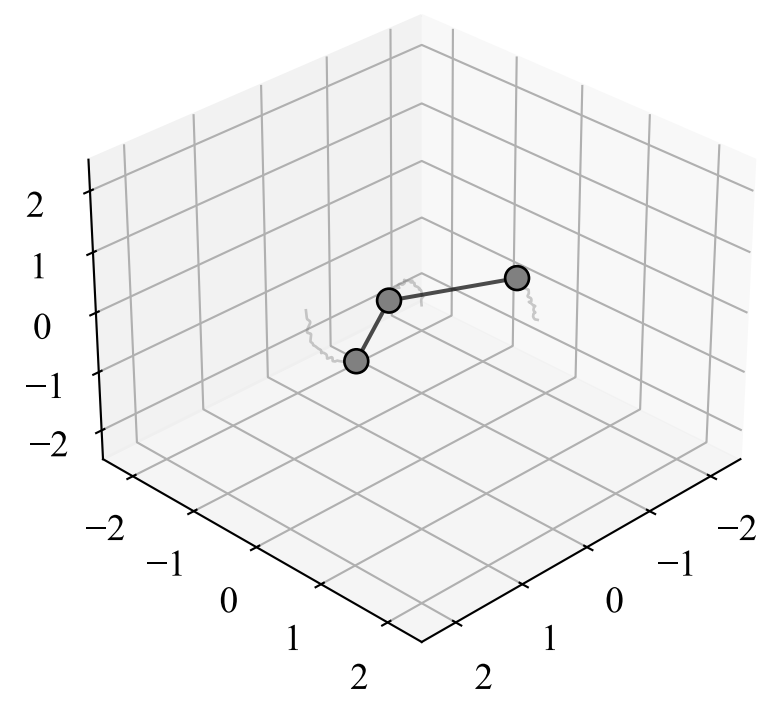

Propylene

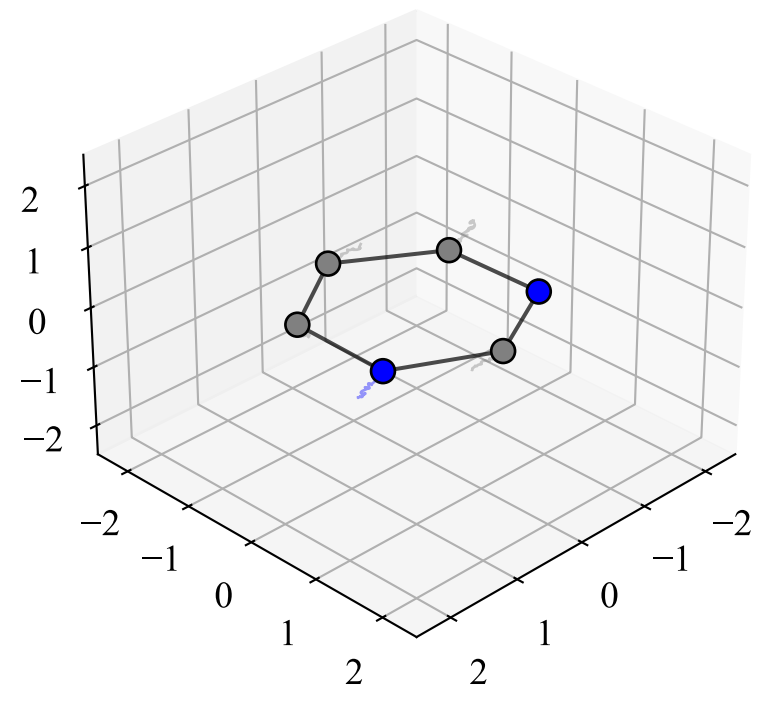

Pyrimidine

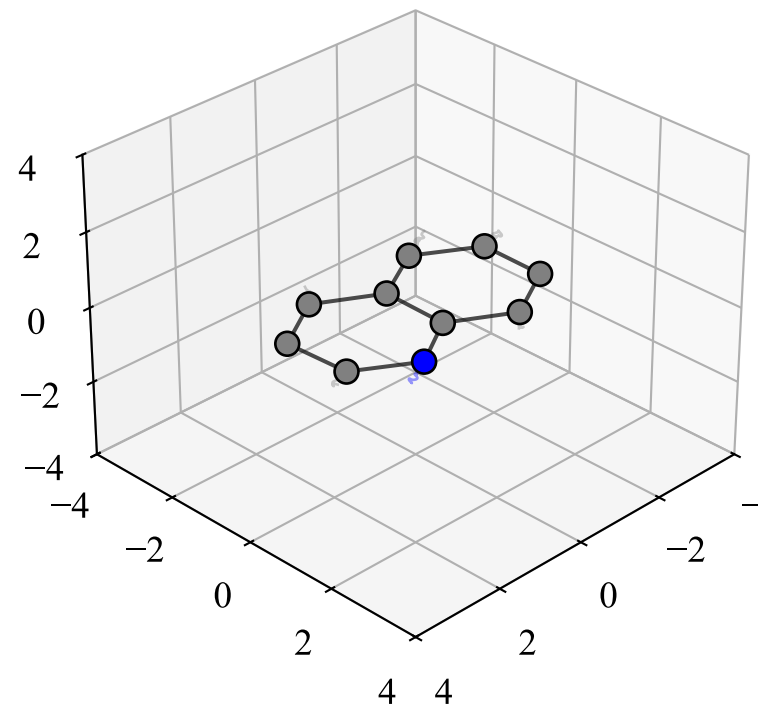

Quinoline

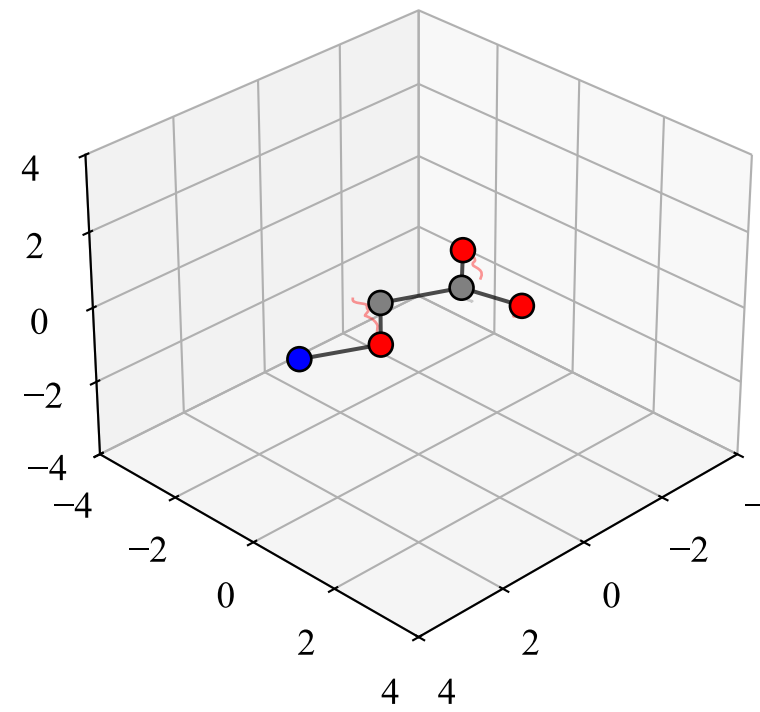

Salicylicacid1

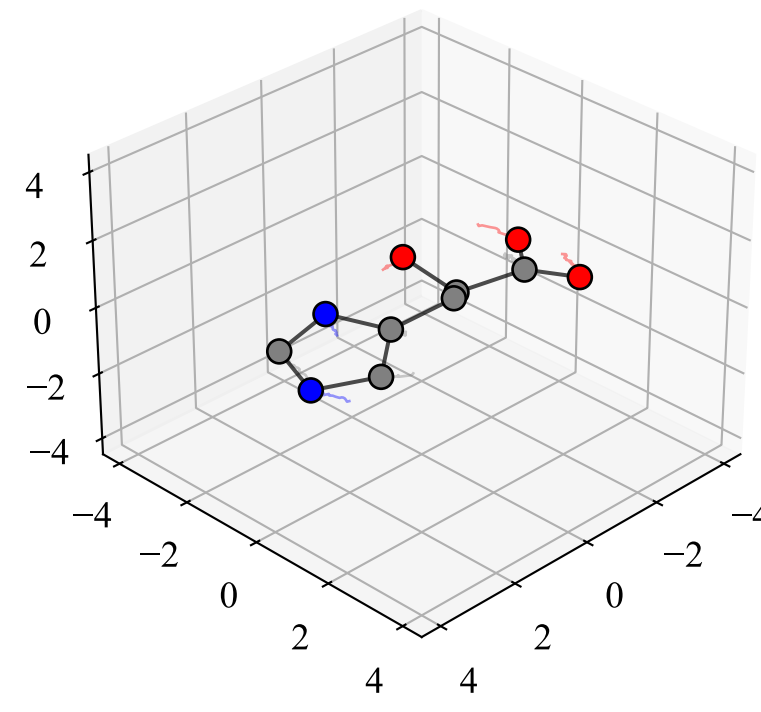

Salicylicacid2

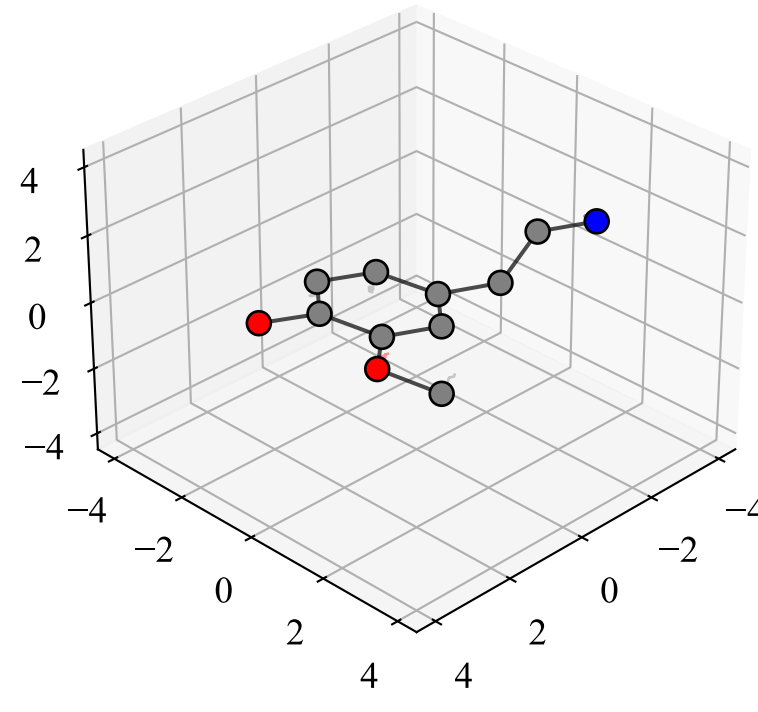

Salicylicacid3

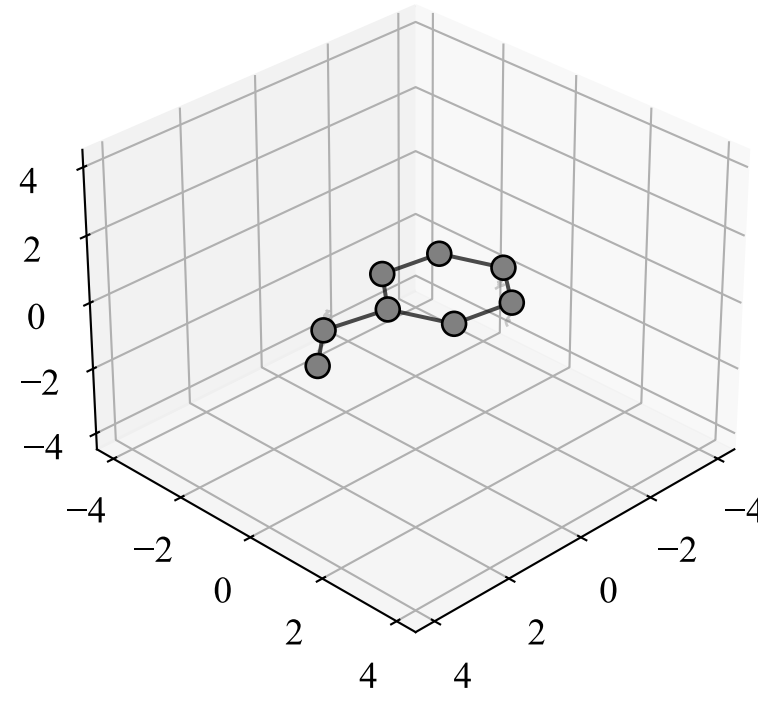

Styrene

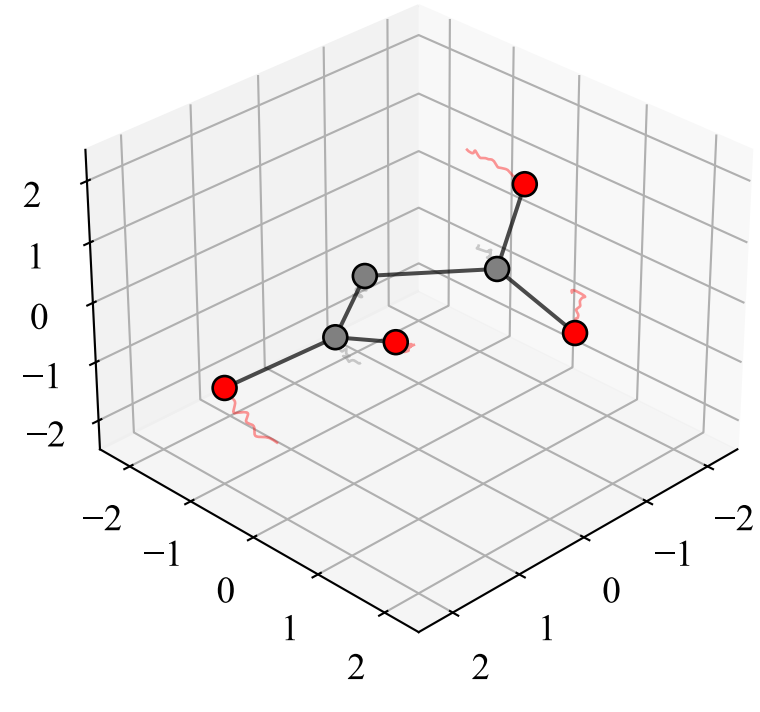

Succinicacid

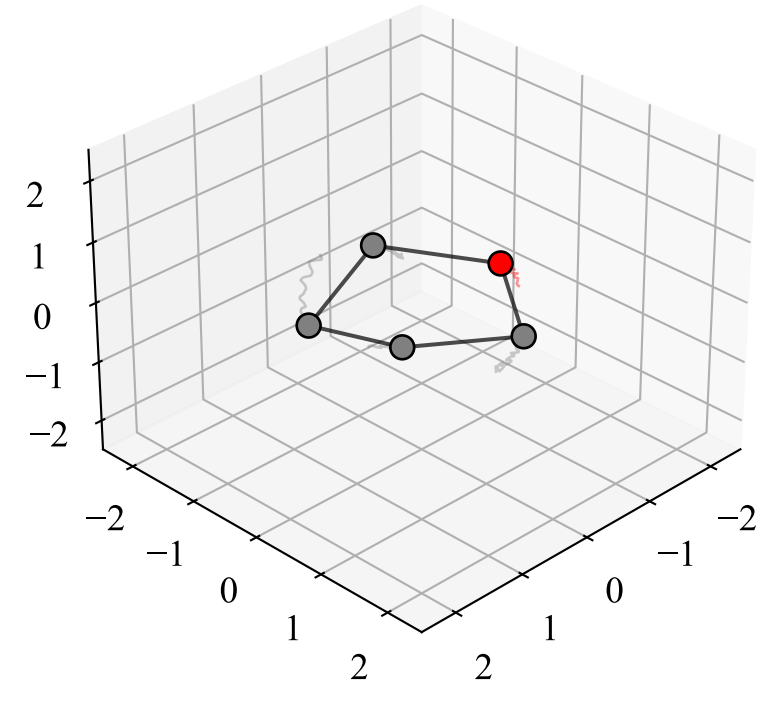

Etrahydrofuran
