# Supplementary material
Source: ML conference proceedings conference paper supplement (https://openreview.net/forum?id=e9cV4xSjbR)

# ATOM Block

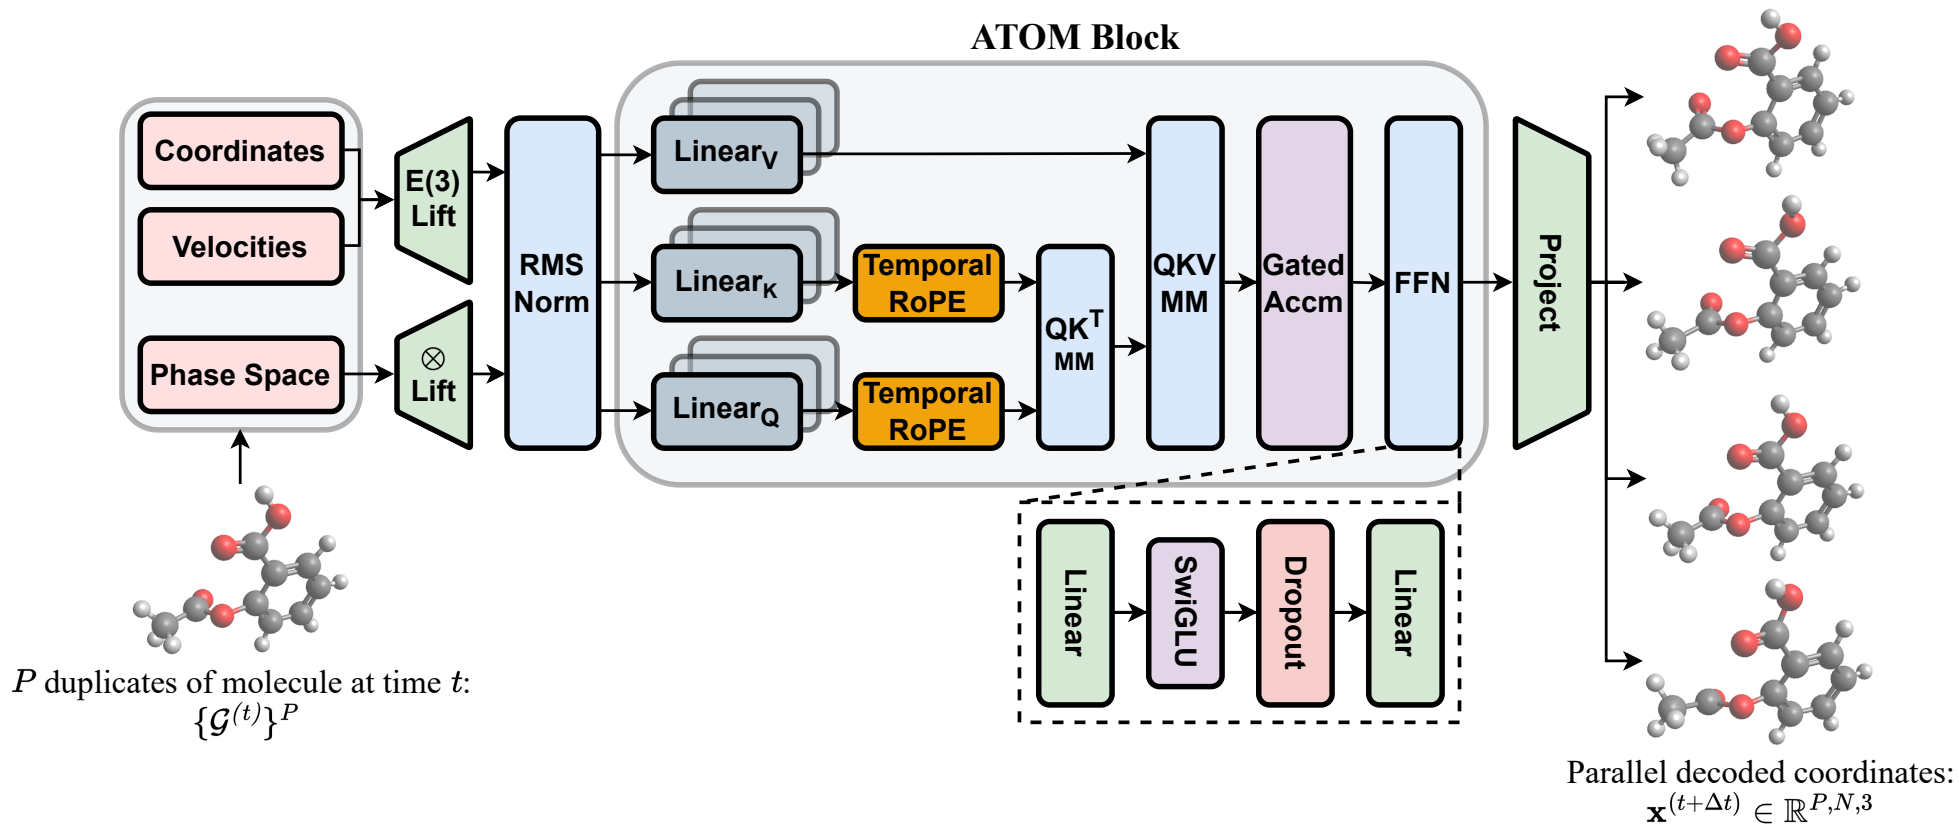

Supplement: supplementary_material [file GTNO_diagram-New RoPE.pdf › Z_paper_content/GTNO_diagram-New RoPE.pdf]

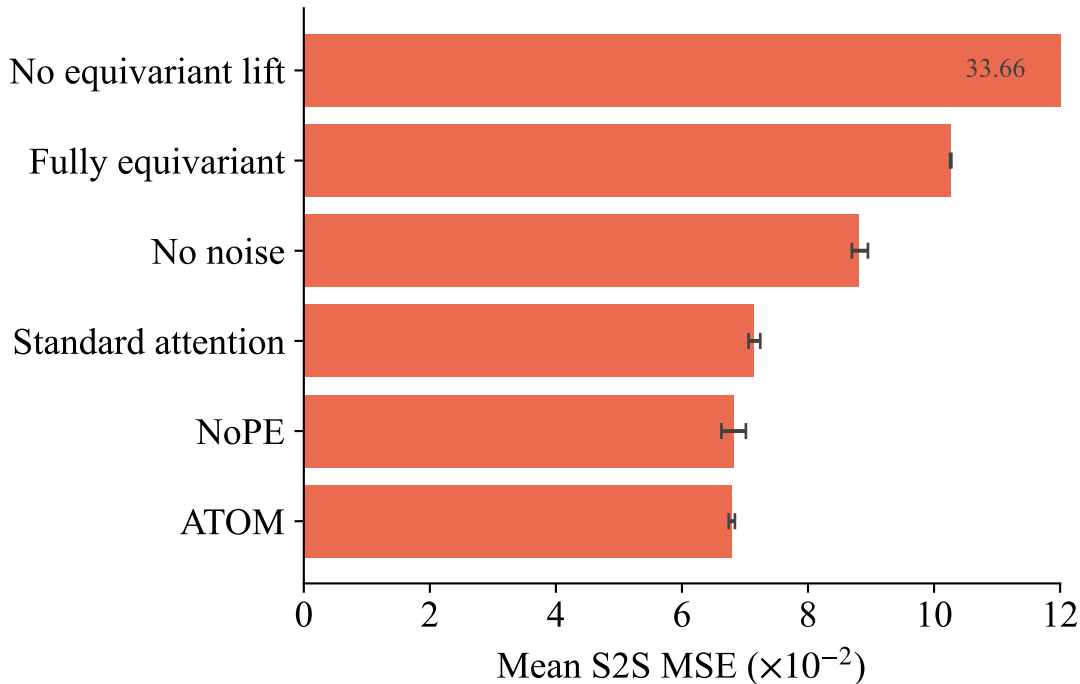

Supplement: supplementary_material [file ablation_MD17_ST_reduced.pdf › Z_paper_content/ablations/ablation_MD17_ST_reduced.pdf]

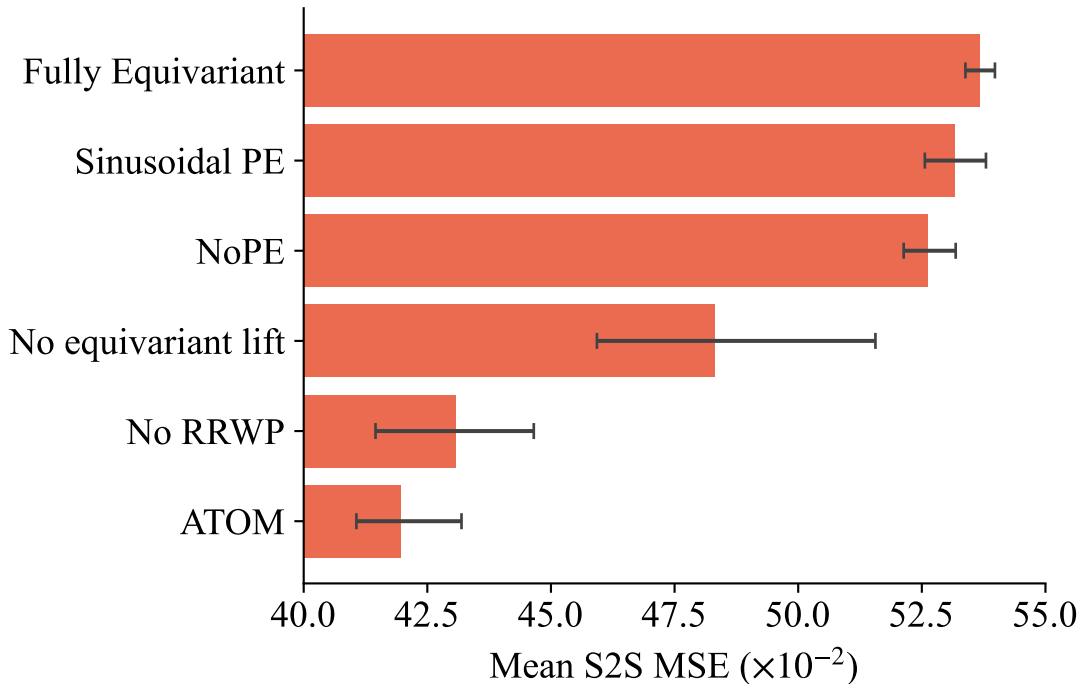

Supplement: supplementary_material [file ablation_TG80_MT.pdf › Z_paper_content/ablations/ablation_TG80_MT.pdf]

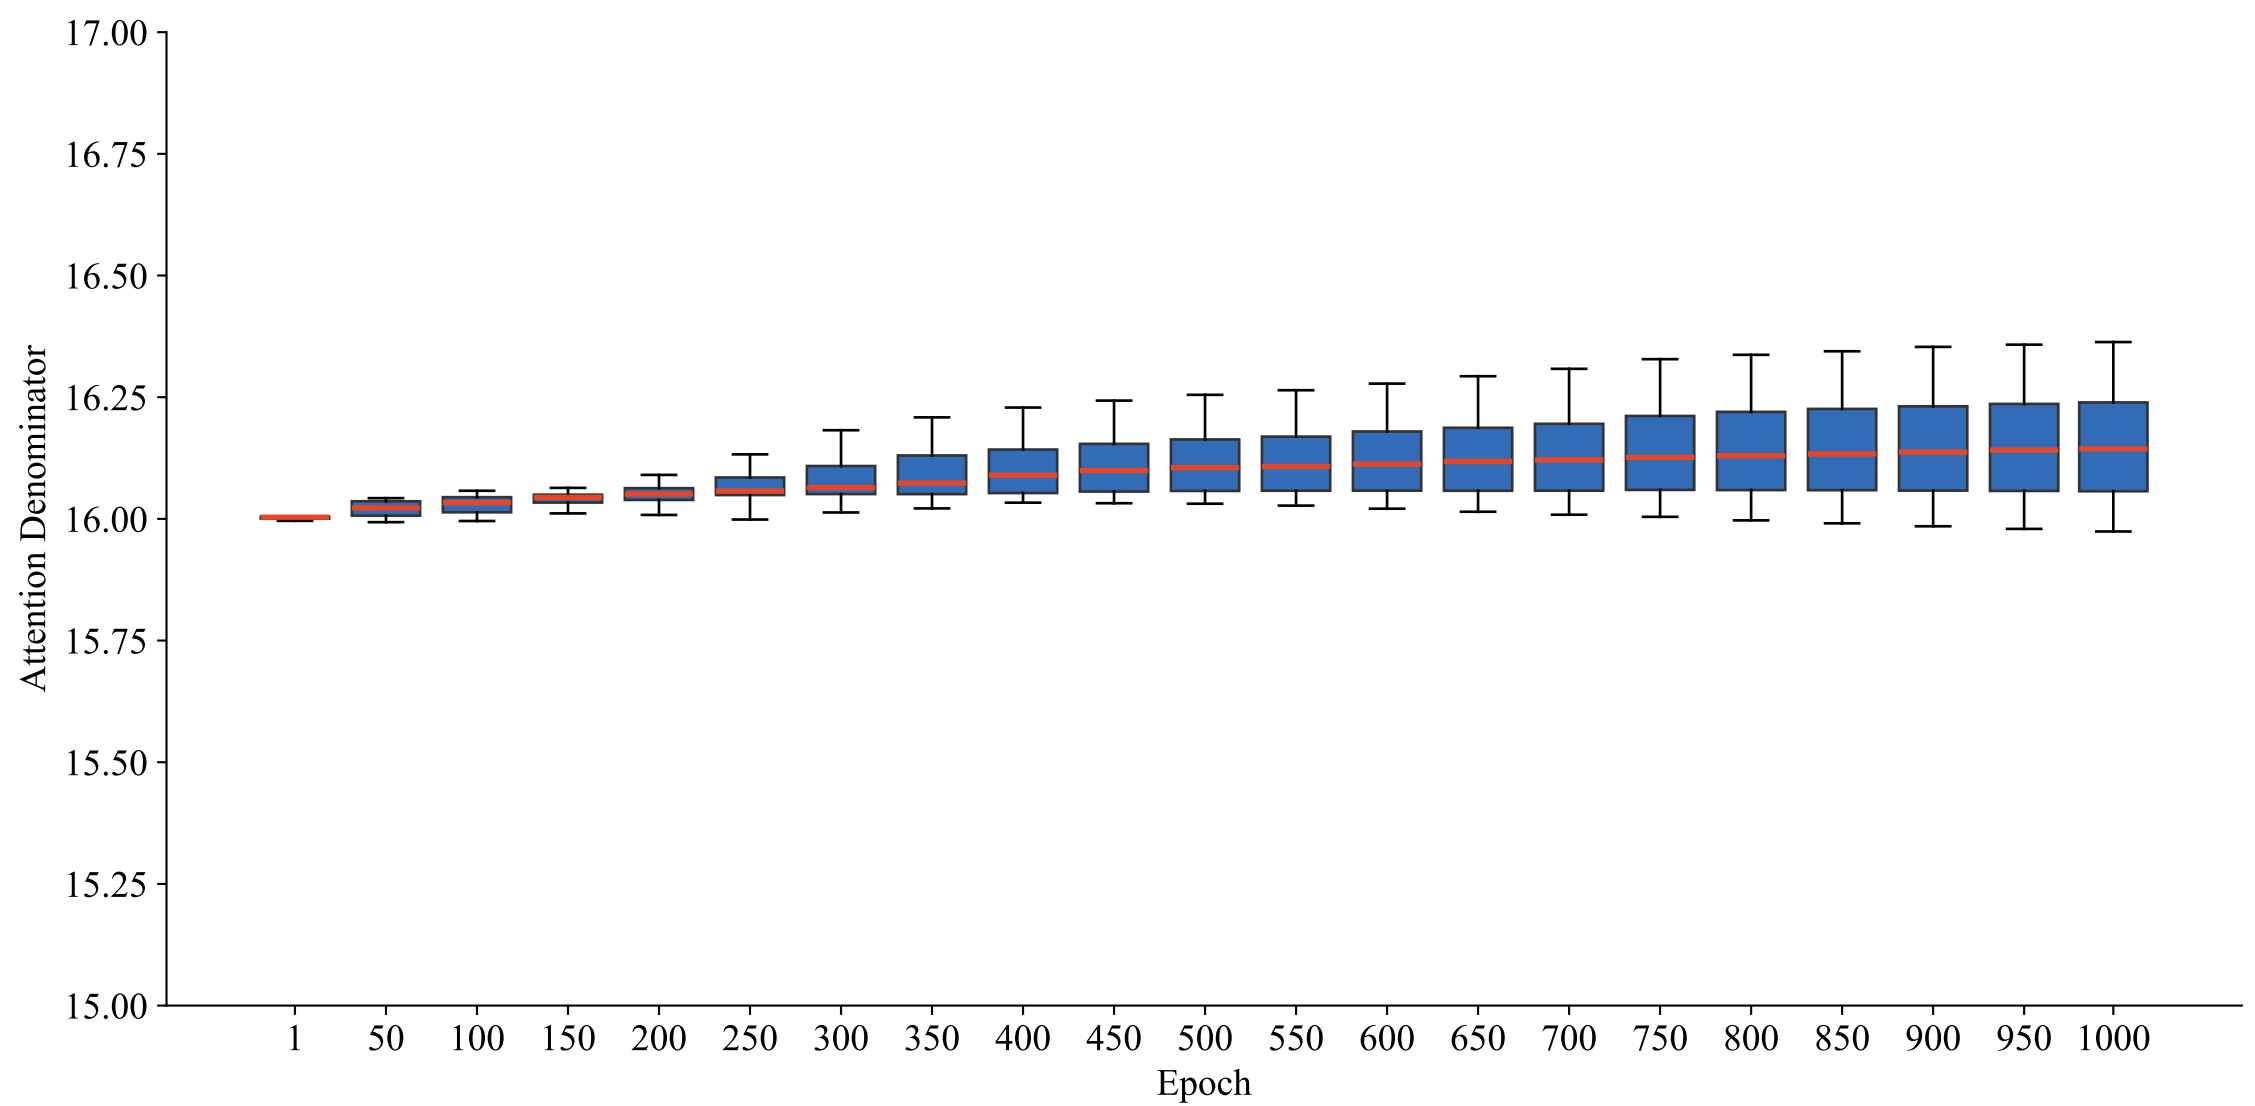

Supplement: supplementary_material [file attention_weights_aspirin.pdf › Z_paper_content/attention_weights/attention_weights_aspirin.pdf]

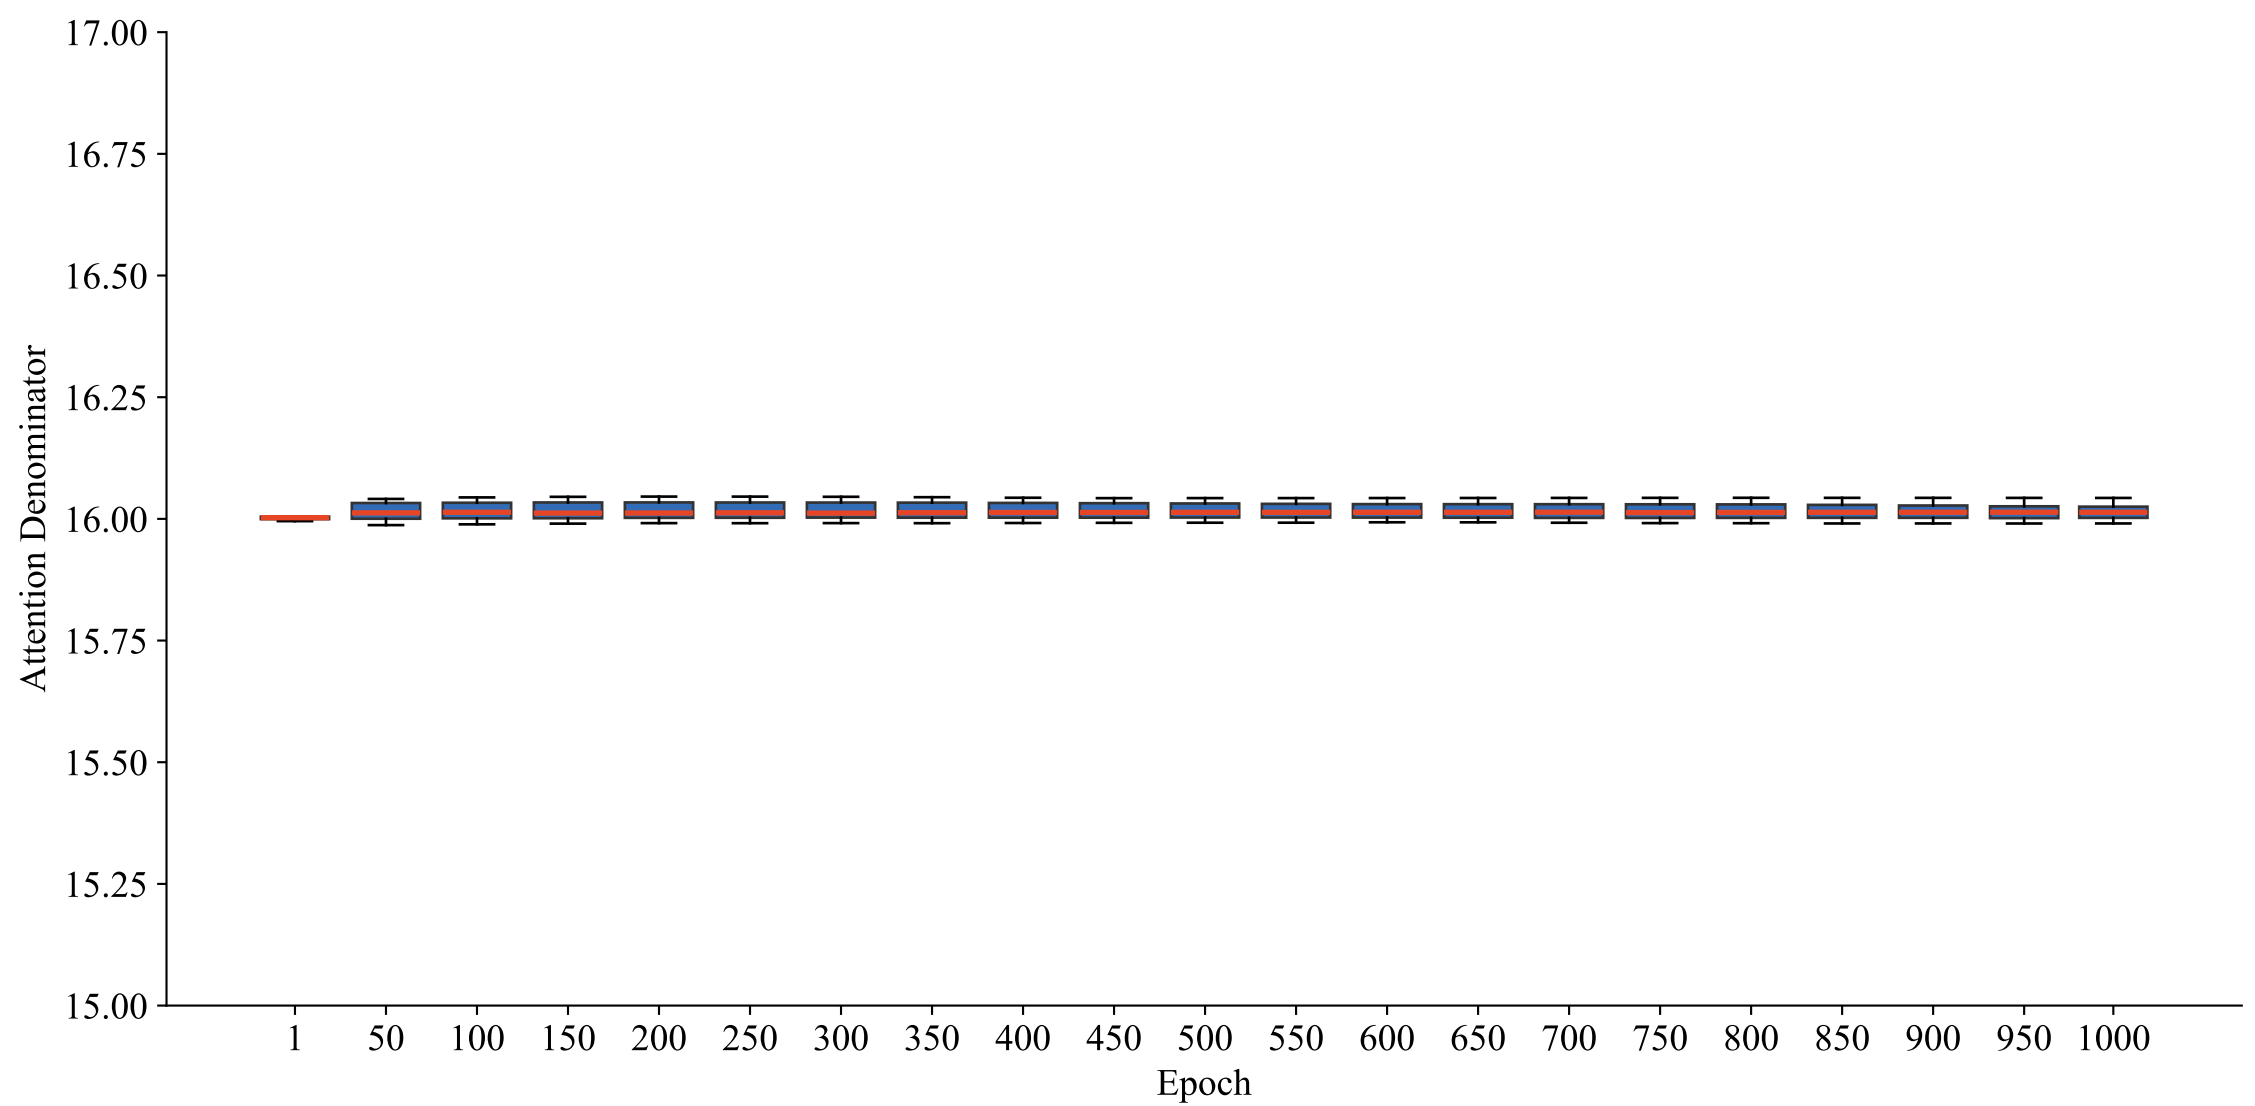

Supplement: supplementary_material [file attention_weights_uracil.pdf › Z_paper_content/attention_weights/attention_weights_uracil.pdf]

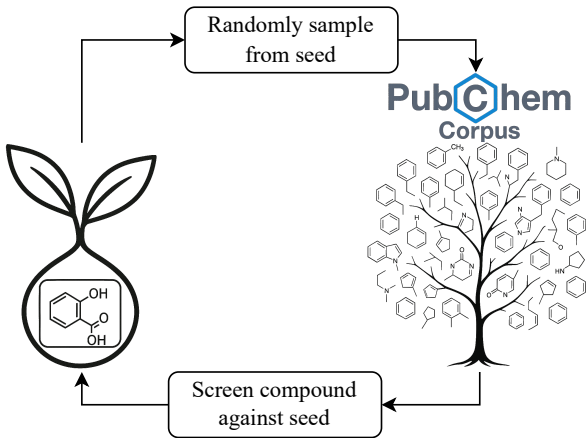

Supplement: supplementary_material [file Dataset_diagram.pdf › Z_paper_content/dataset/Dataset_diagram.pdf]

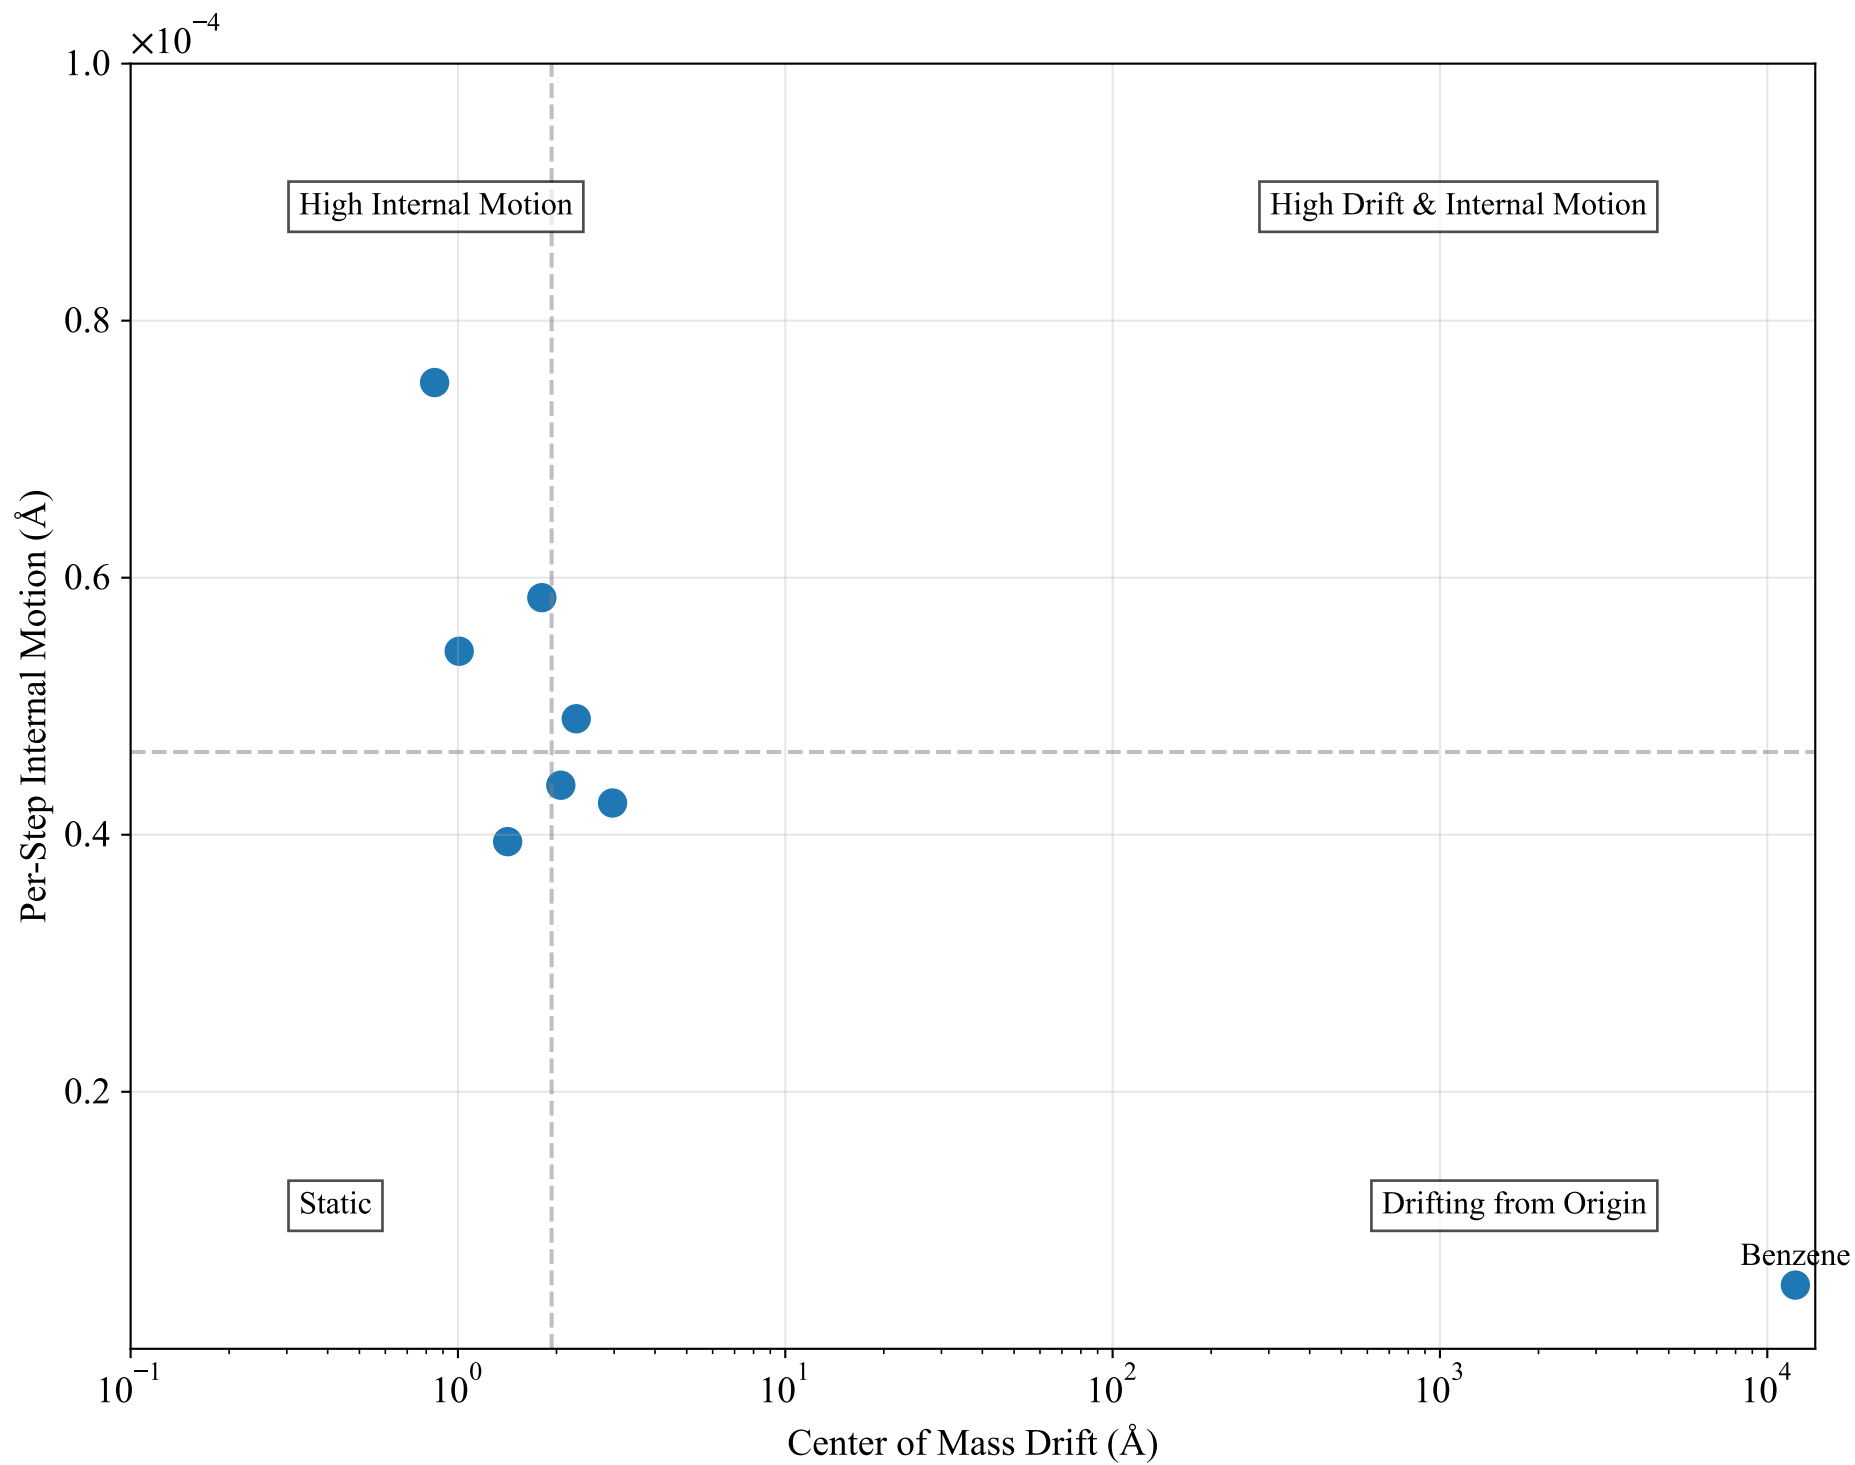

Supplement: supplementary_material [file md17_molecule_behavior_comparison.pdf › Z_paper_content/dataset/md17_molecule_behavior_comparison.pdf]

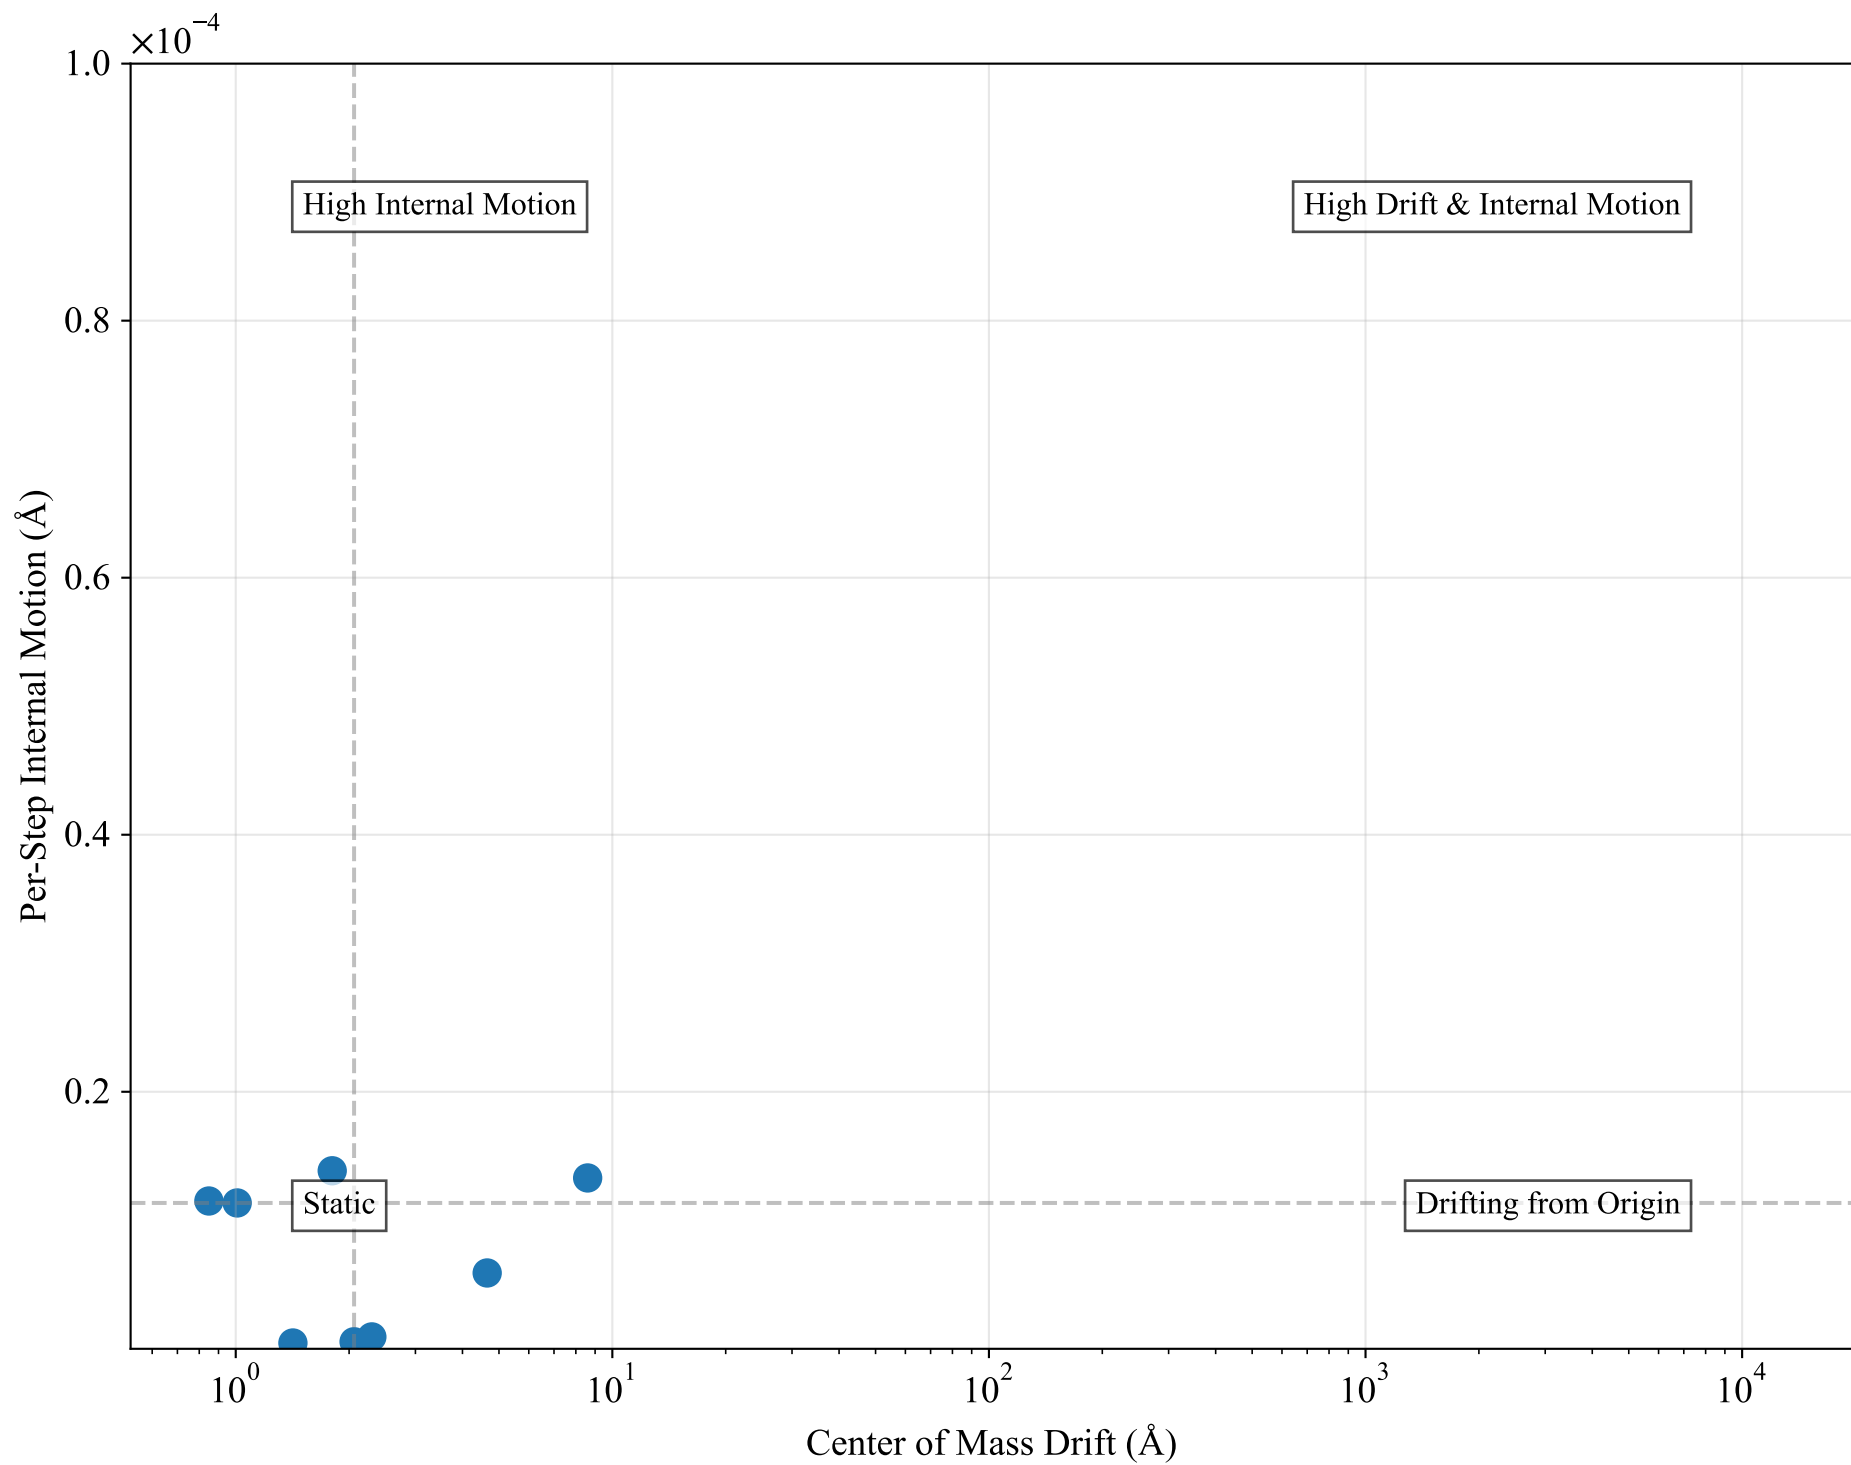

Supplement: supplementary_material [file rmd17_molecule_behavior_comparison.pdf › Z_paper_content/dataset/rmd17_molecule_behavior_comparison.pdf]

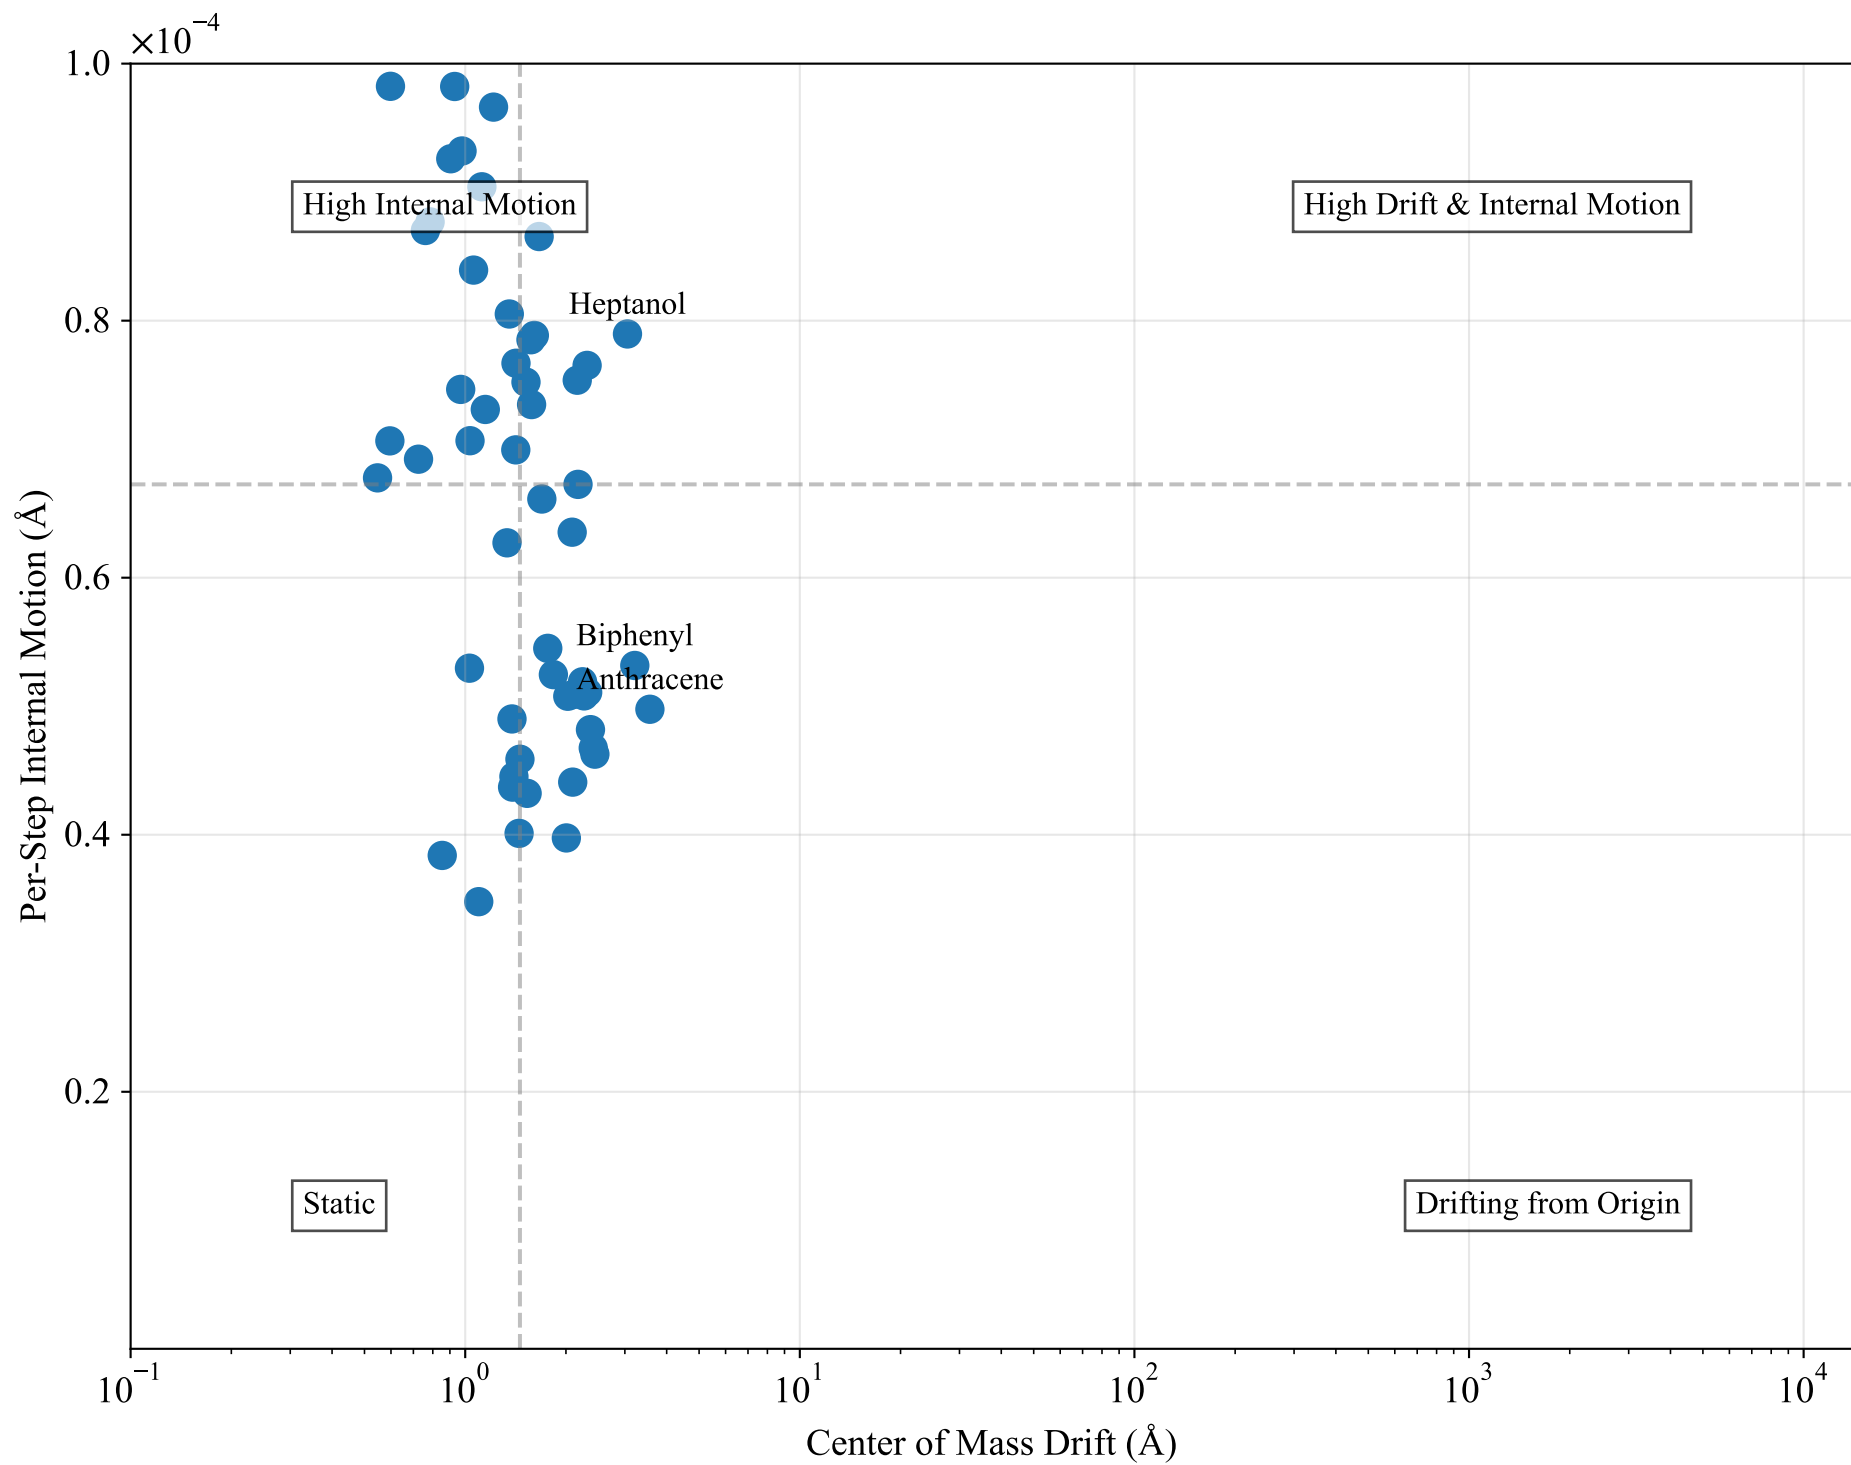

Supplement: supplementary_material [file tg80_molecule_behavior_comparison.pdf › Z_paper_content/dataset/tg80_molecule_behavior_comparison.pdf]

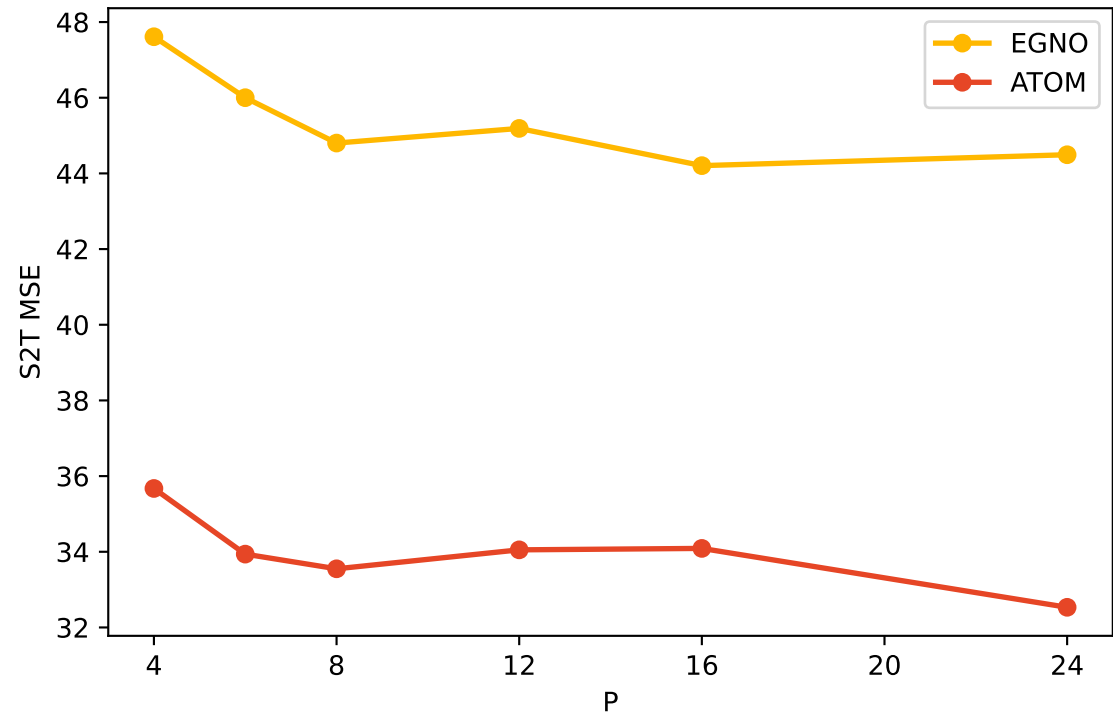

Supplement: supplementary_material [file p_invariance_multi.pdf › Z_paper_content/invariance_results/p_invariance_multi.pdf]

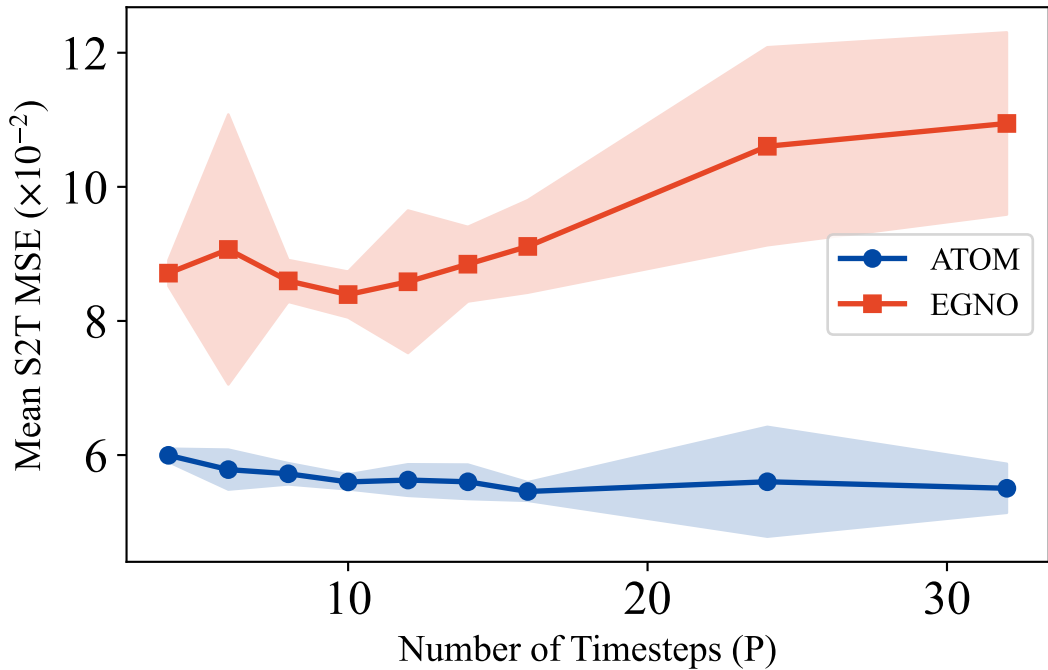

Supplement: supplementary_material [file p_invariance_results.pdf › Z_paper_content/invariance_results/p_invariance_results.pdf]

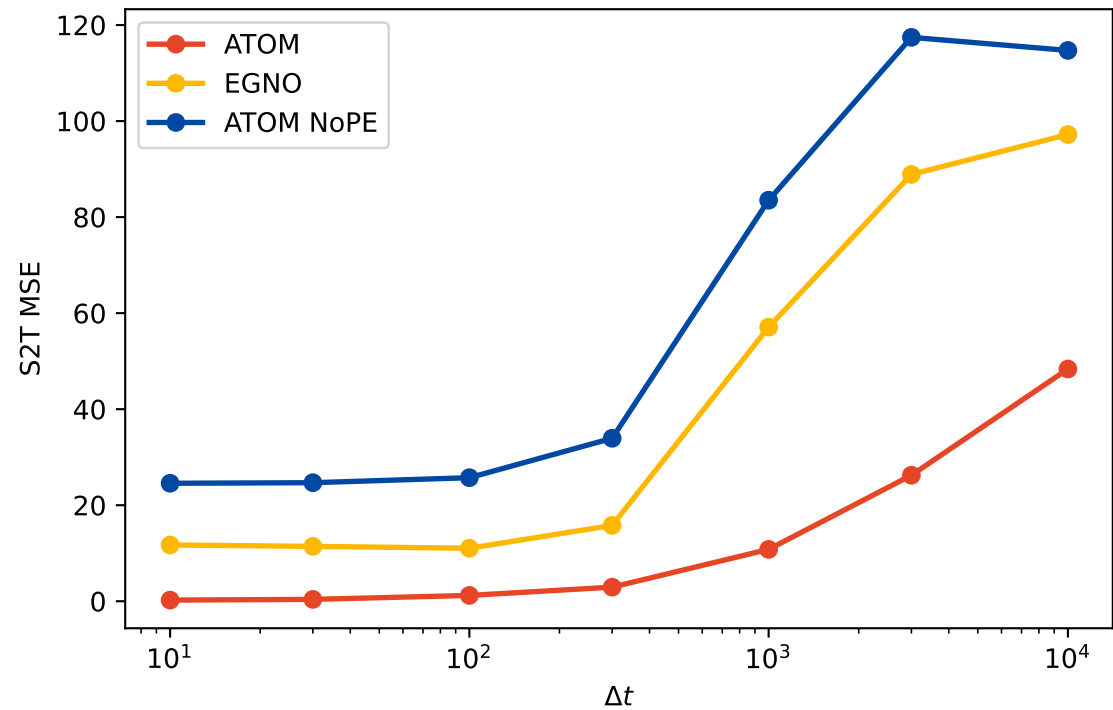

Supplement: supplementary_material [file t_invariance_multi.pdf › Z_paper_content/invariance_results/t_invariance_multi.pdf]

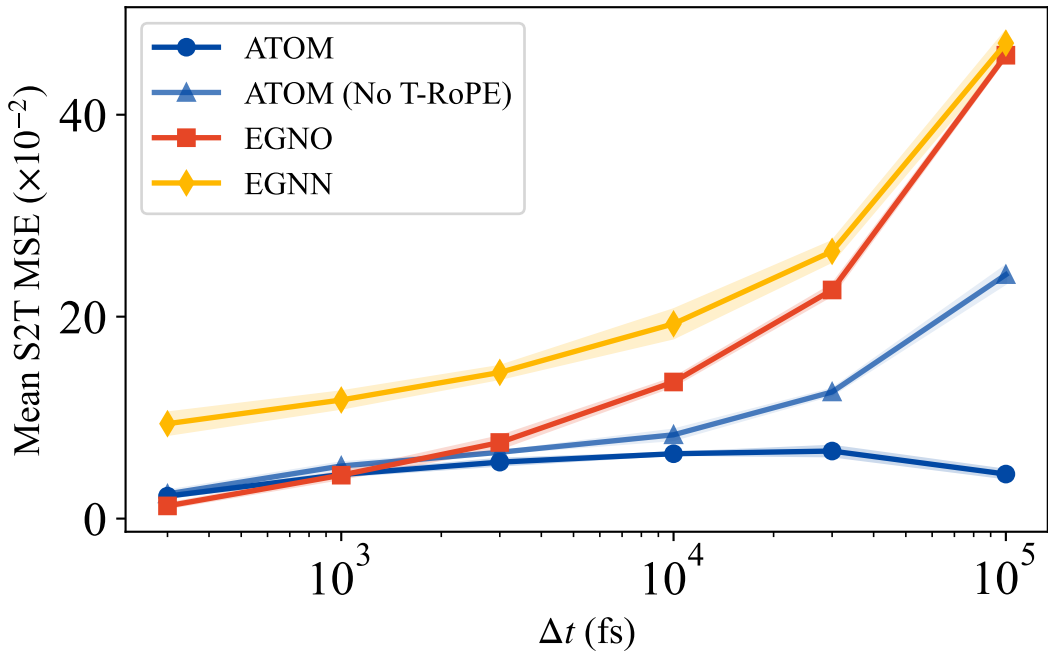

Supplement: supplementary_material [file t_invariance_results.pdf › Z_paper_content/invariance_results/t_invariance_results.pdf]

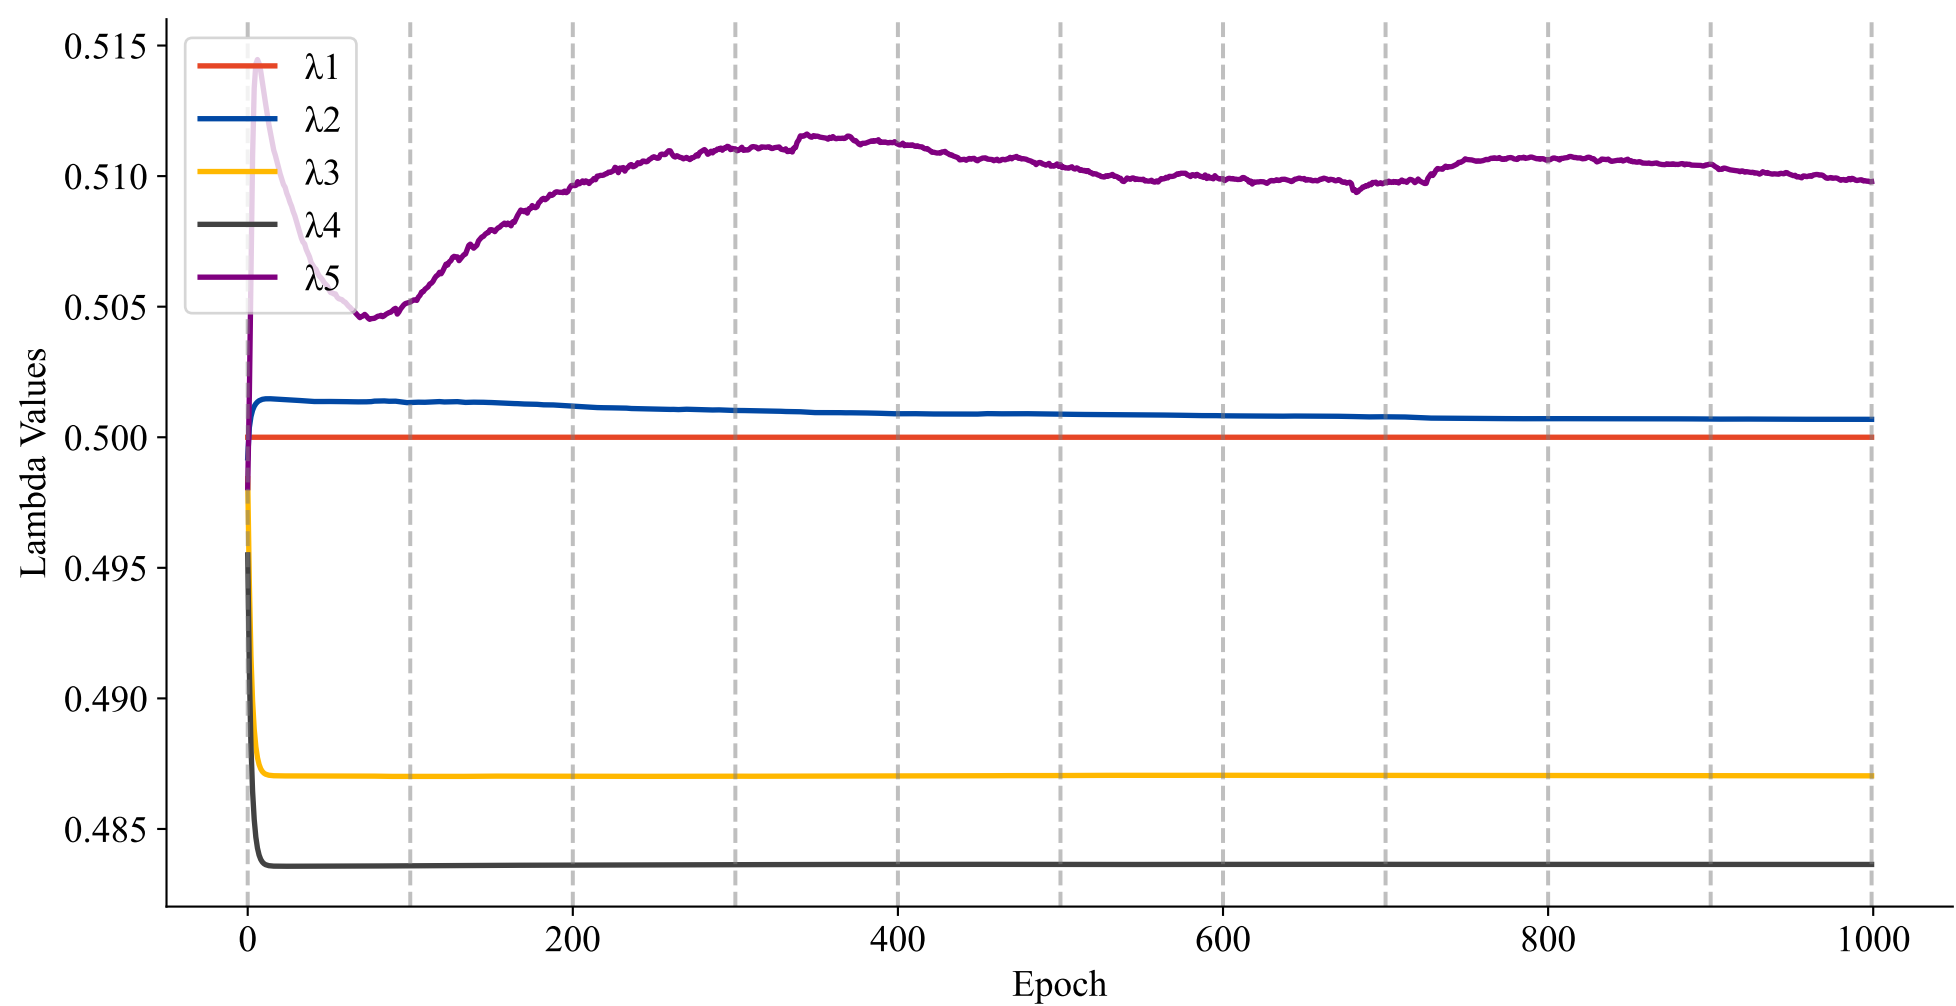

Supplement: supplementary_material [file lambda_values_aspirin.pdf › Z_paper_content/lambda_value_residuals/lambda_values_aspirin.pdf]

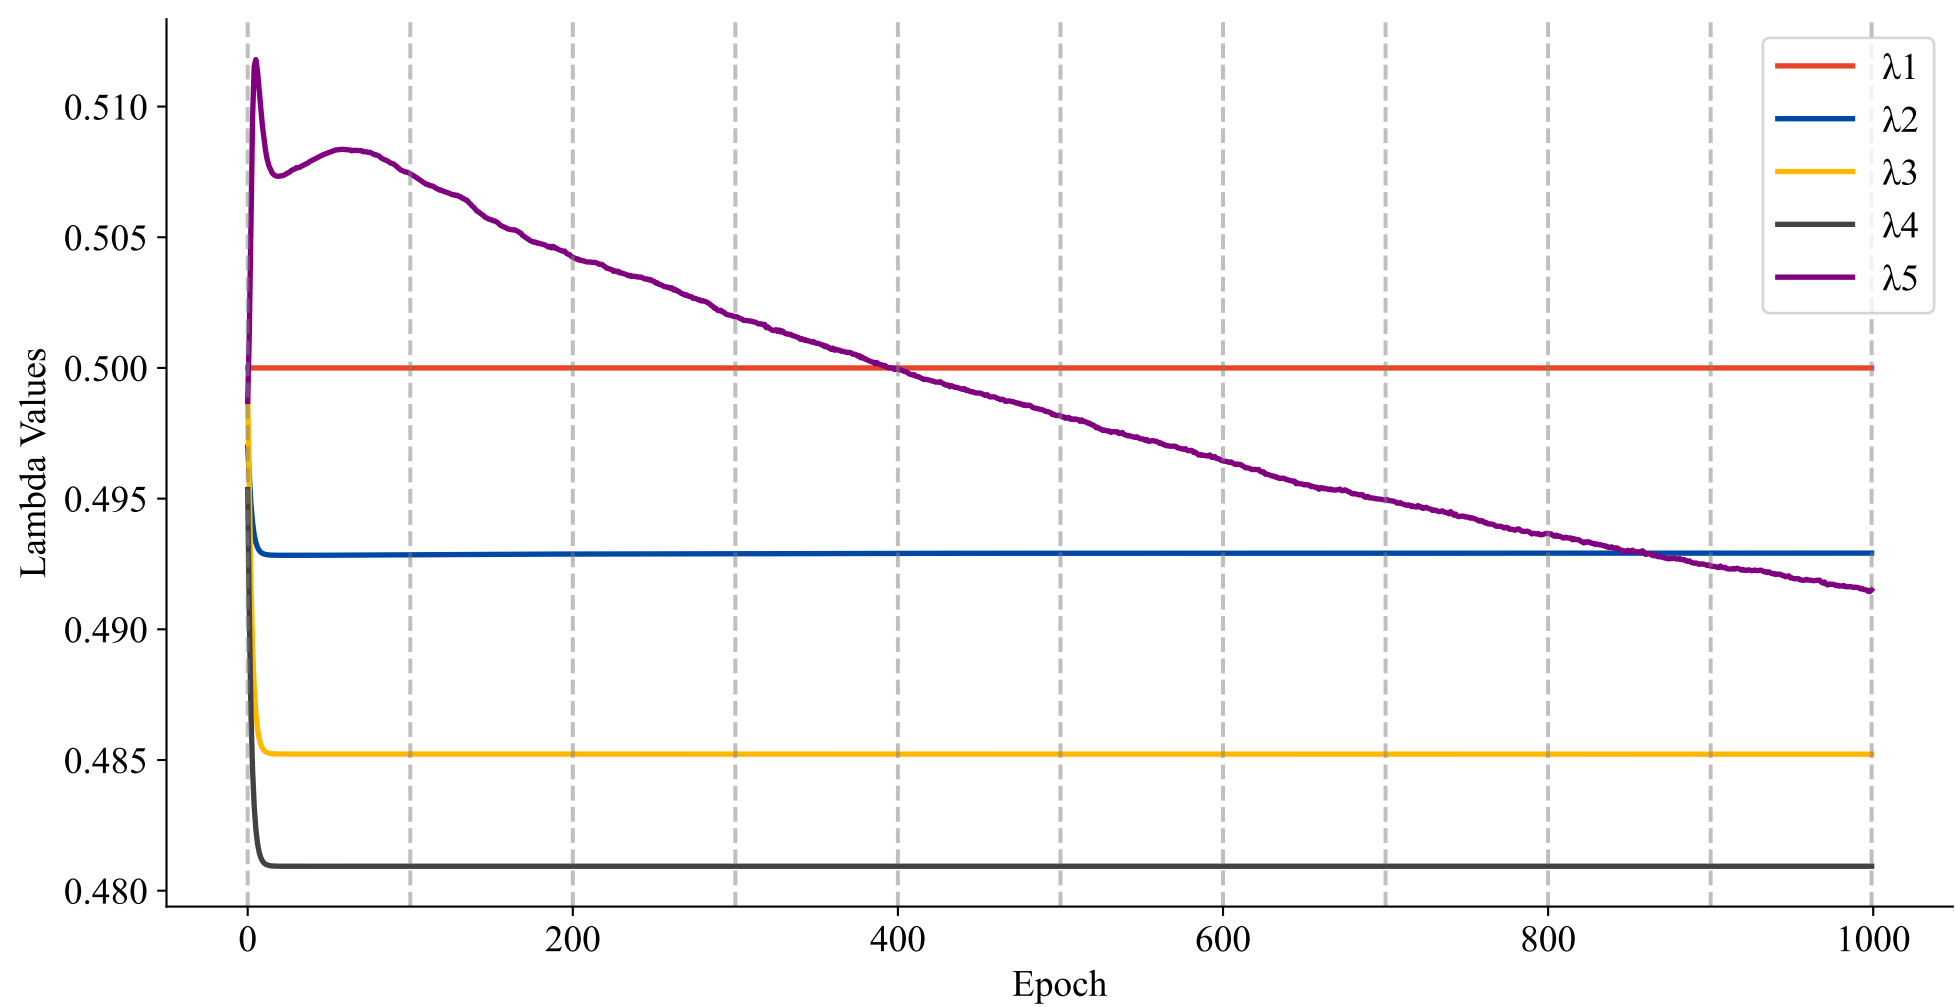

Supplement: supplementary_material [file lambda_values_uracil.pdf › Z_paper_content/lambda_value_residuals/lambda_values_uracil.pdf]

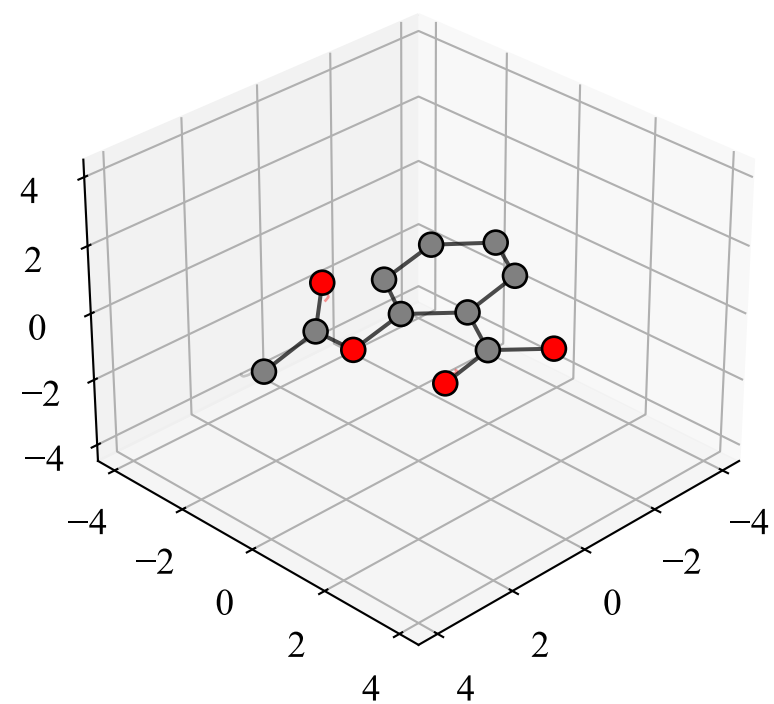

Aspirin

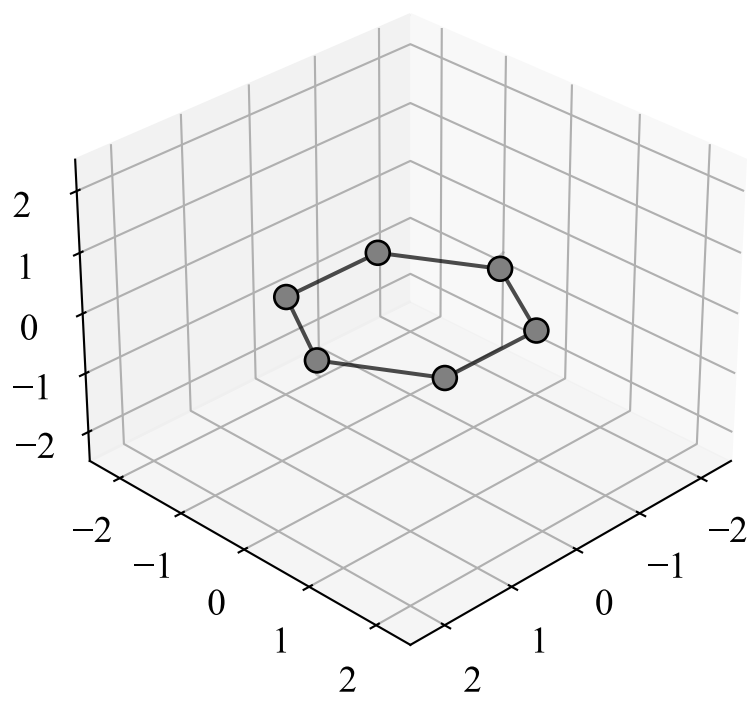

Benzene

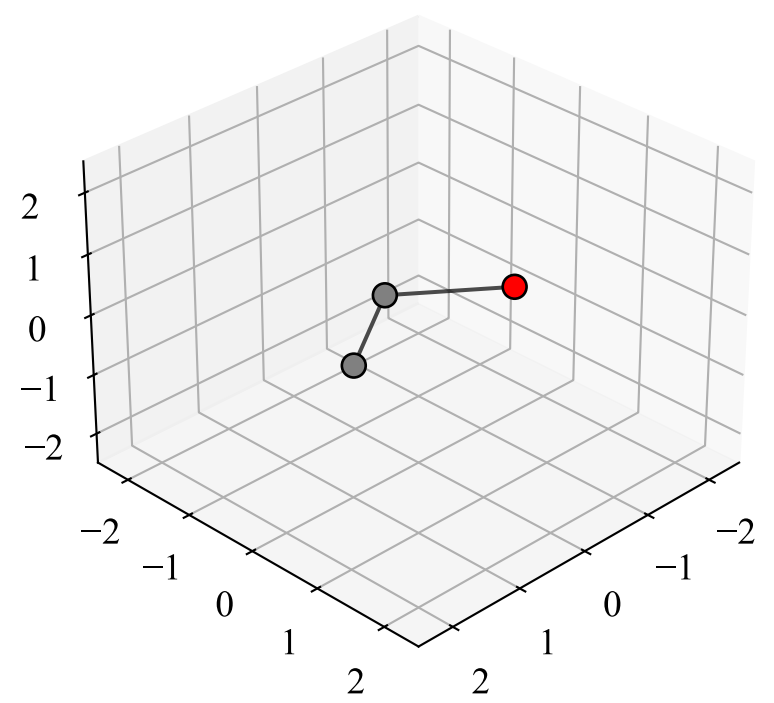

Ethanol

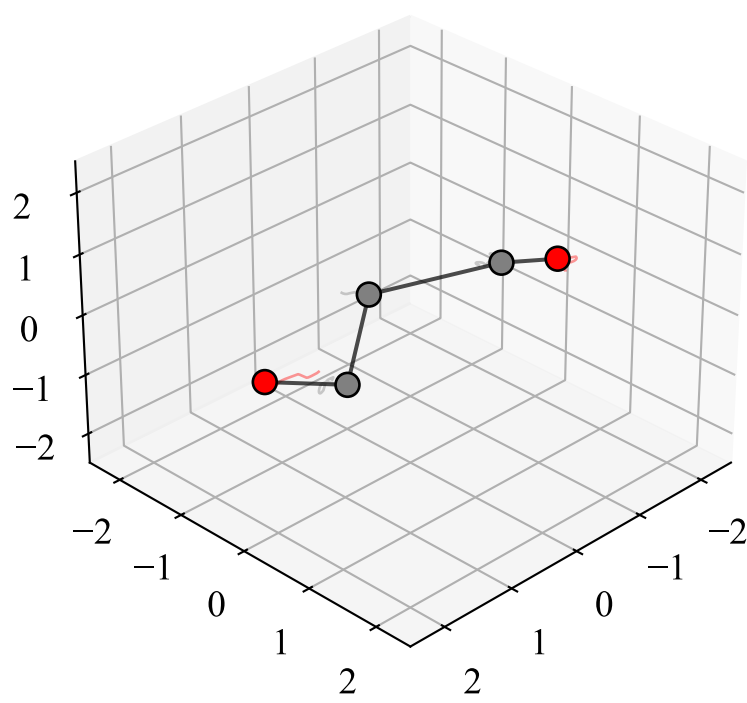

Alonaldehyde

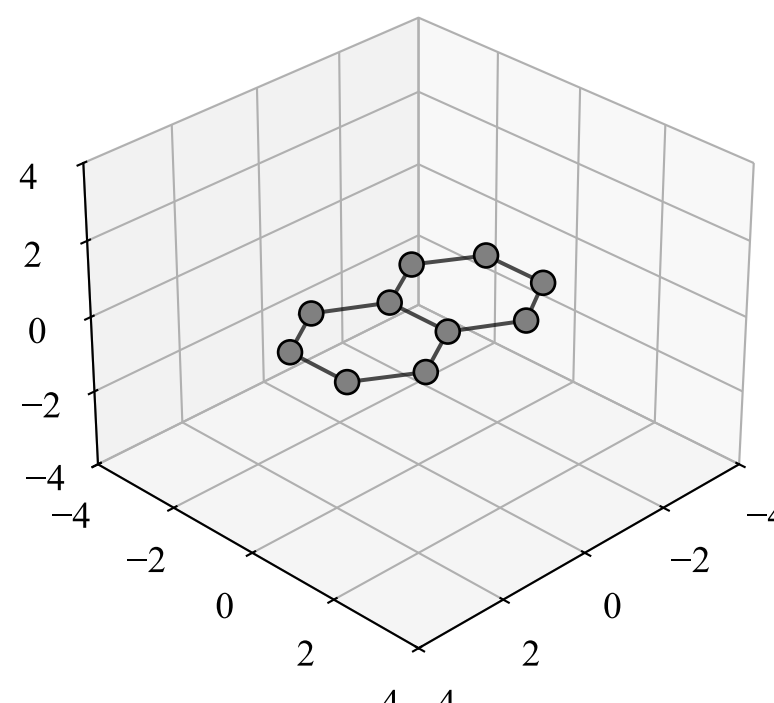

Naphthalene

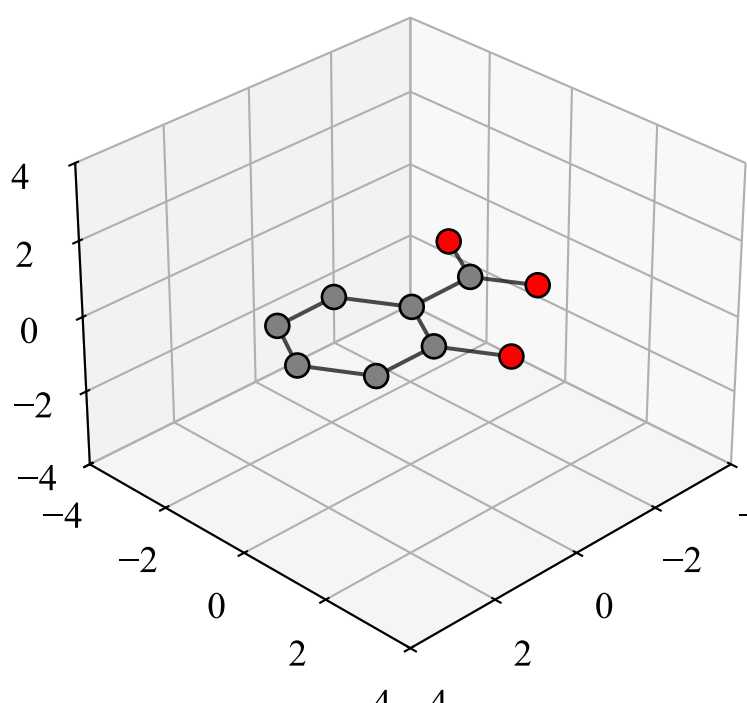

Salicylic

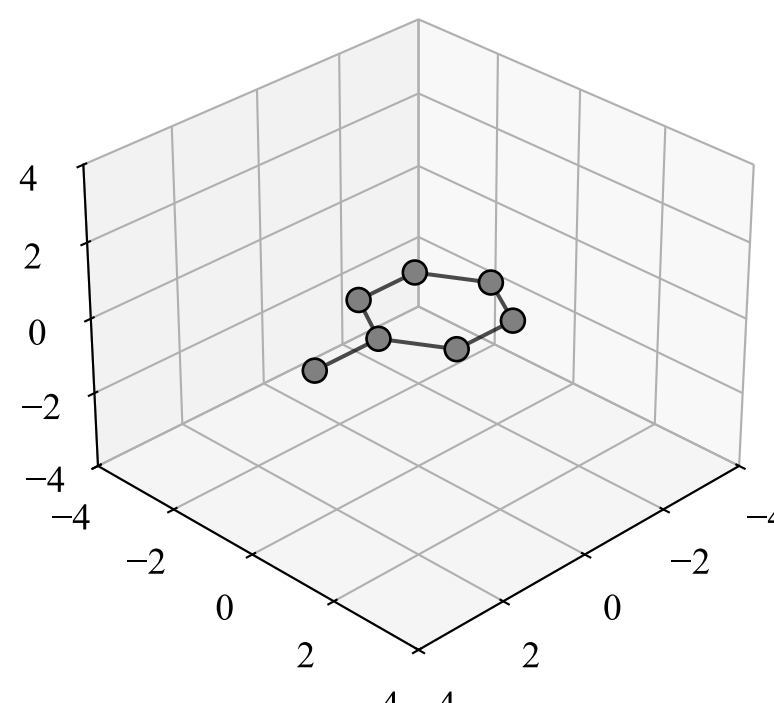

Toluene

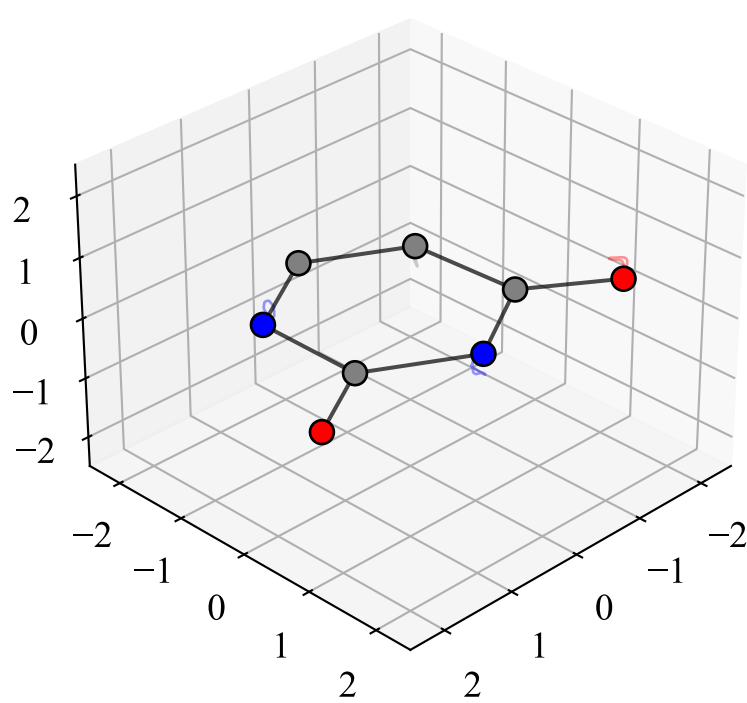

Uracil

Supplement: supplementary_material [file md17_combined_trajectories.pdf › Z_paper_content/trajectories/md17_combined_trajectories.pdf]

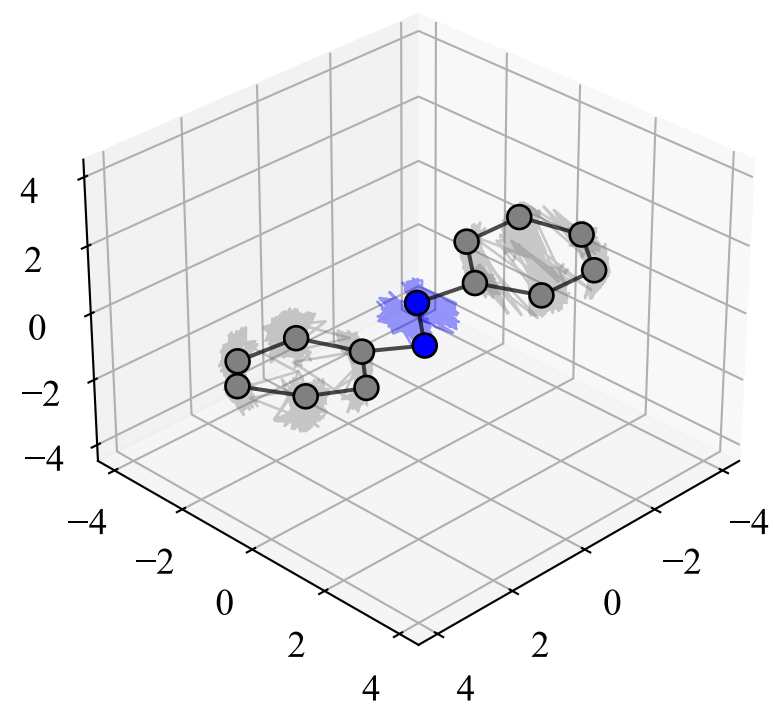

Azobenzene

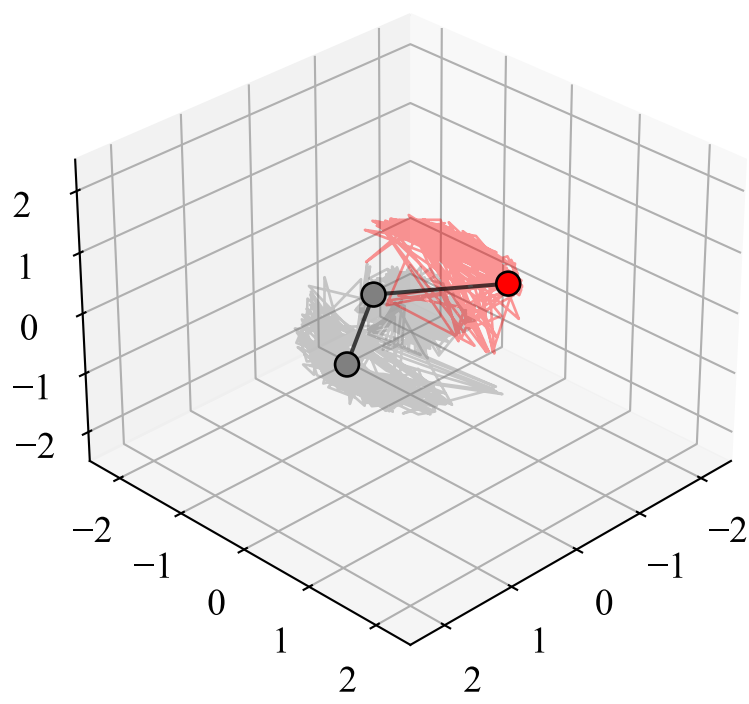

Ethanol

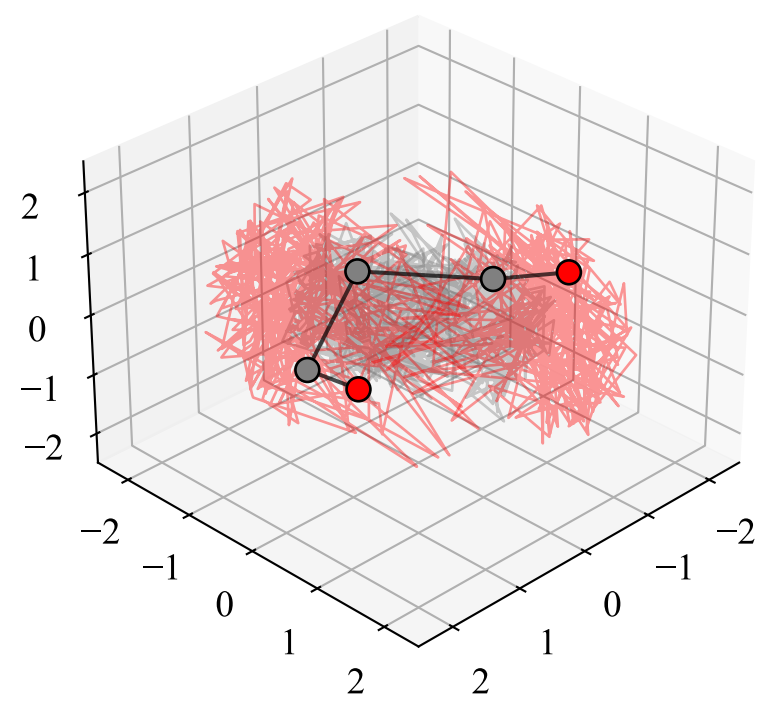

Alonaldehyde

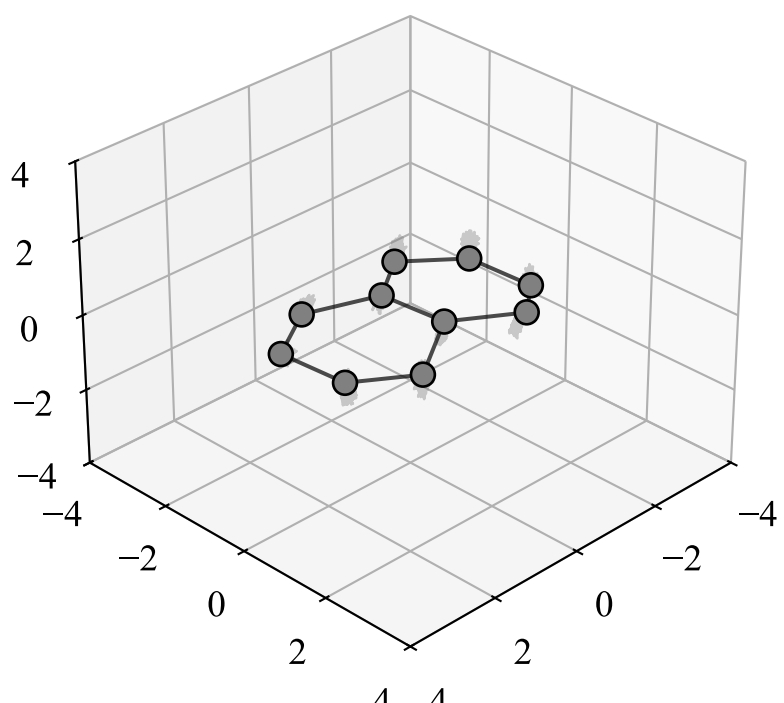

Naphthalene

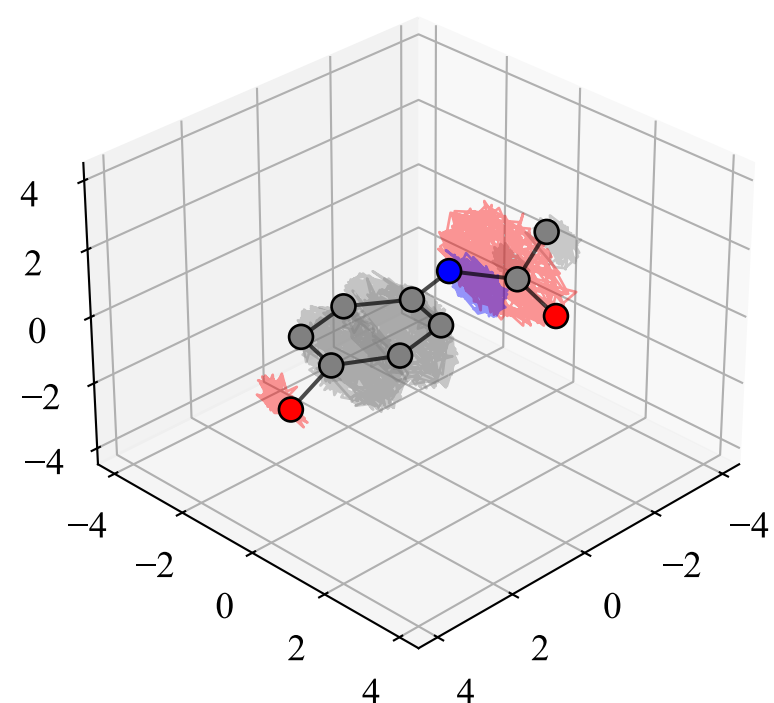

Paracetamol

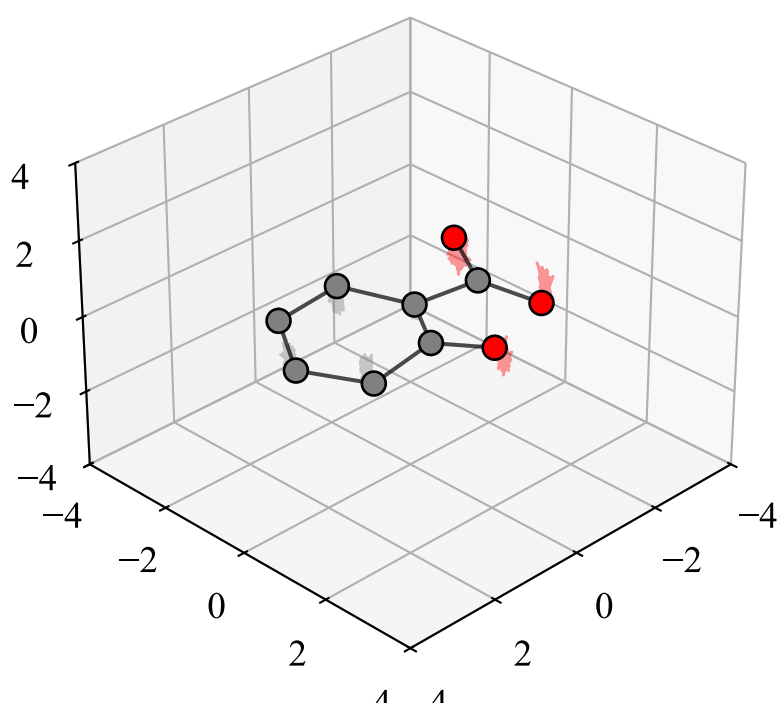

Salicylic

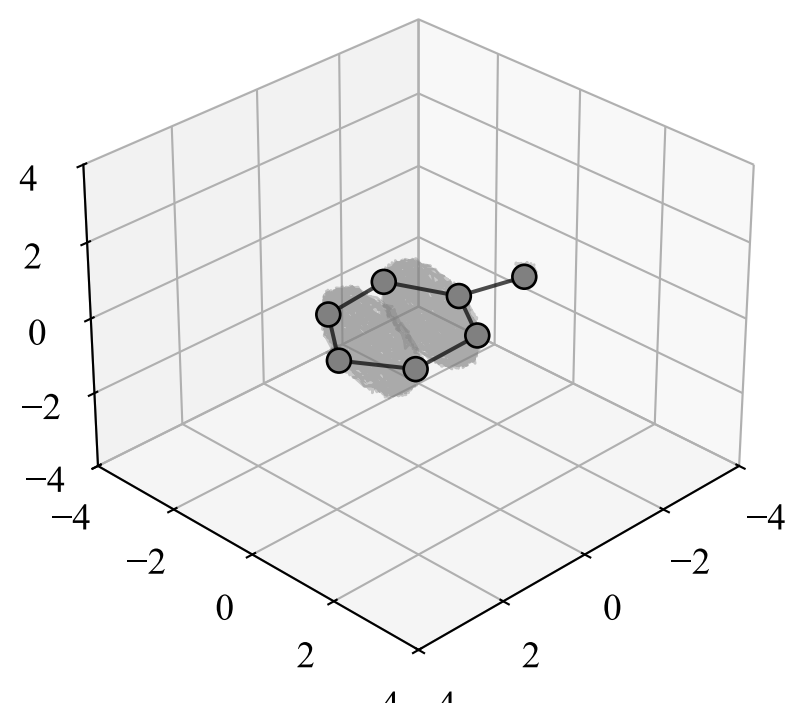

Toluene

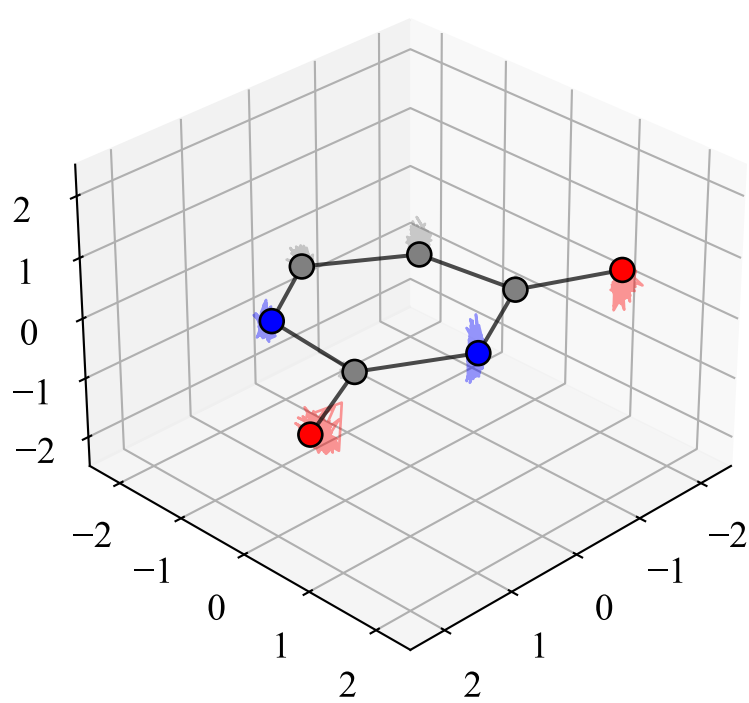

Uracil

Supplement: supplementary_material [file rmd17_combined_trajectories.pdf › Z_paper_content/trajectories/rmd17_combined_trajectories.pdf]

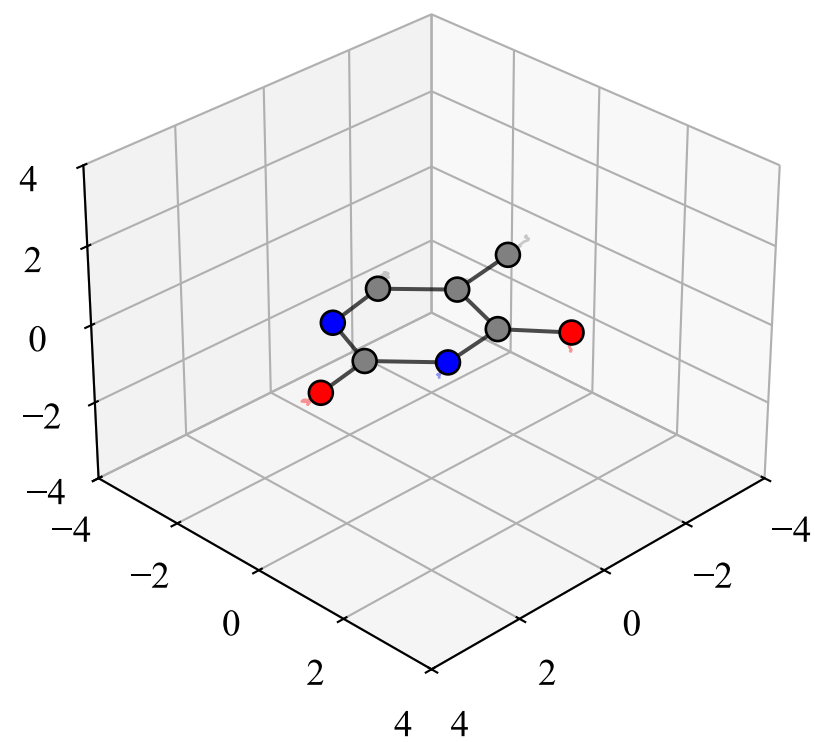

Humine

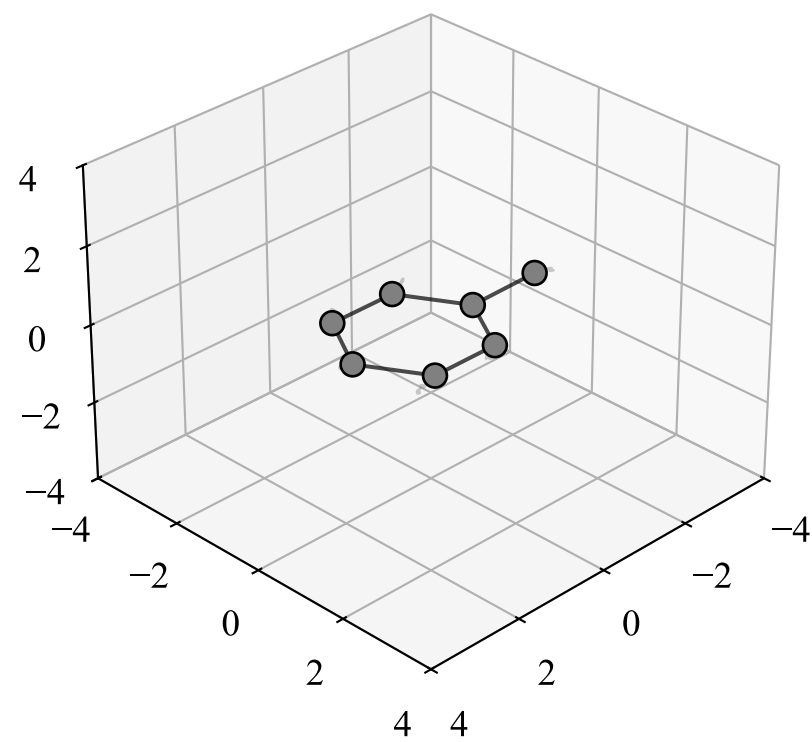

Oluene

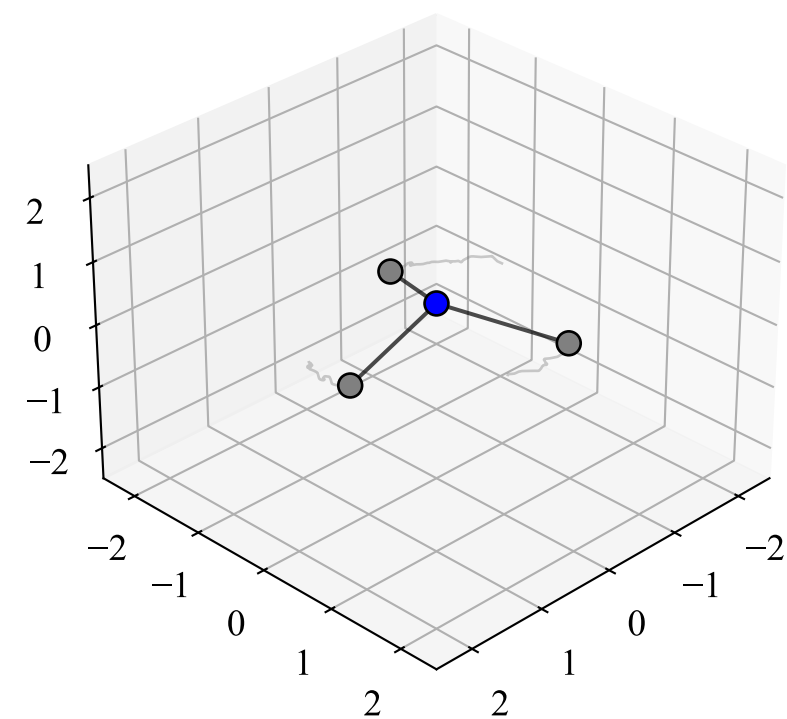

Dimethylamine

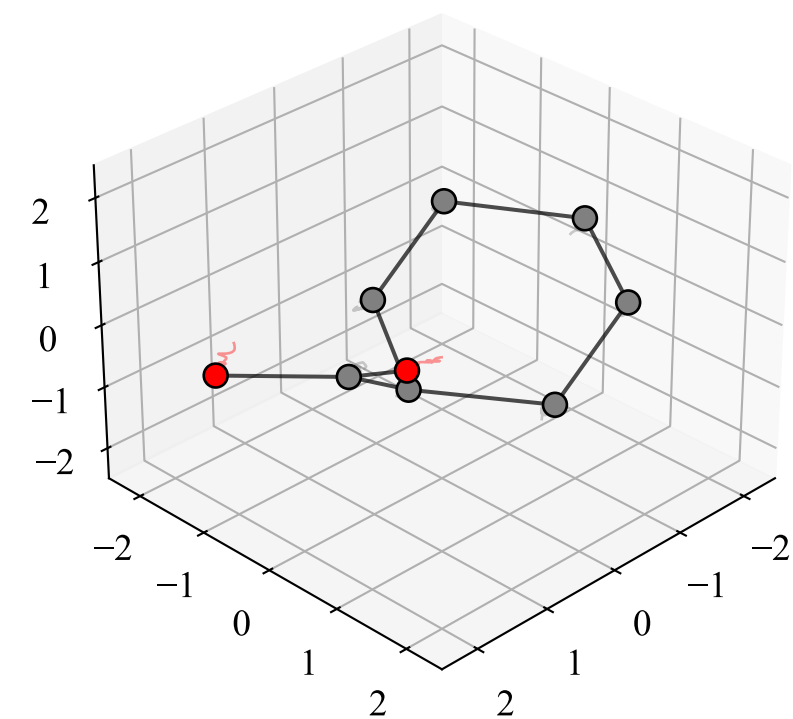

Ropane1

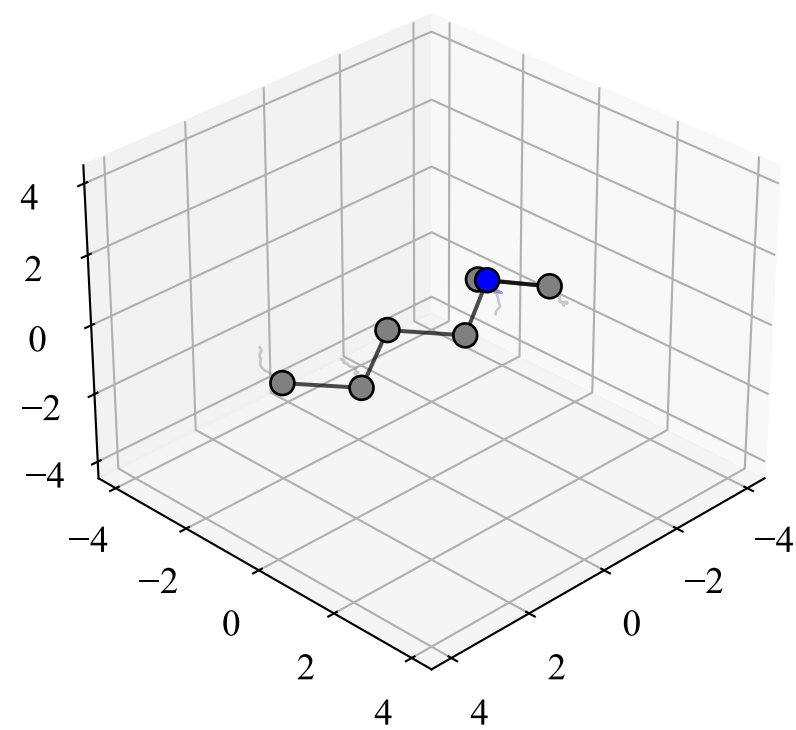

Ropane2

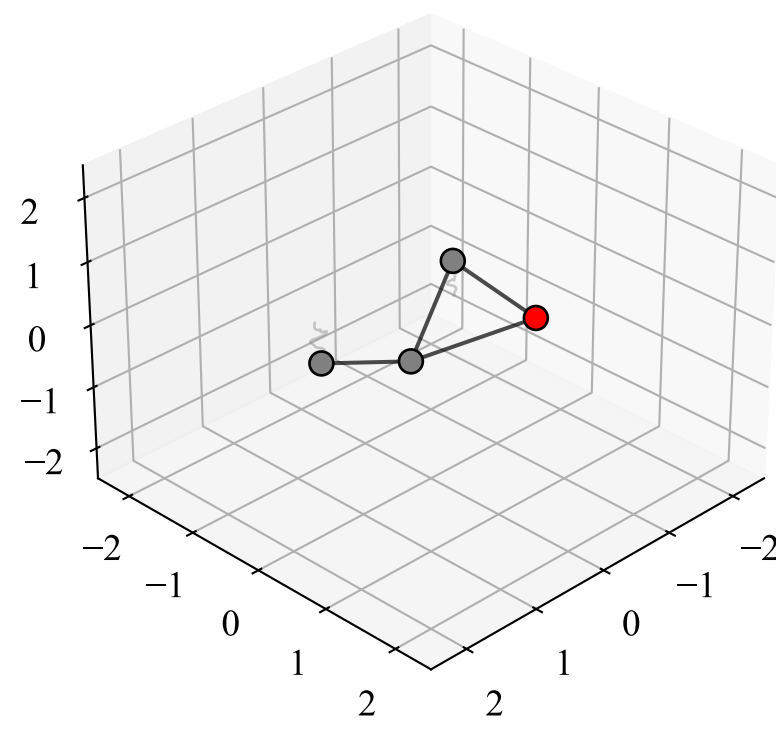

Ropane3

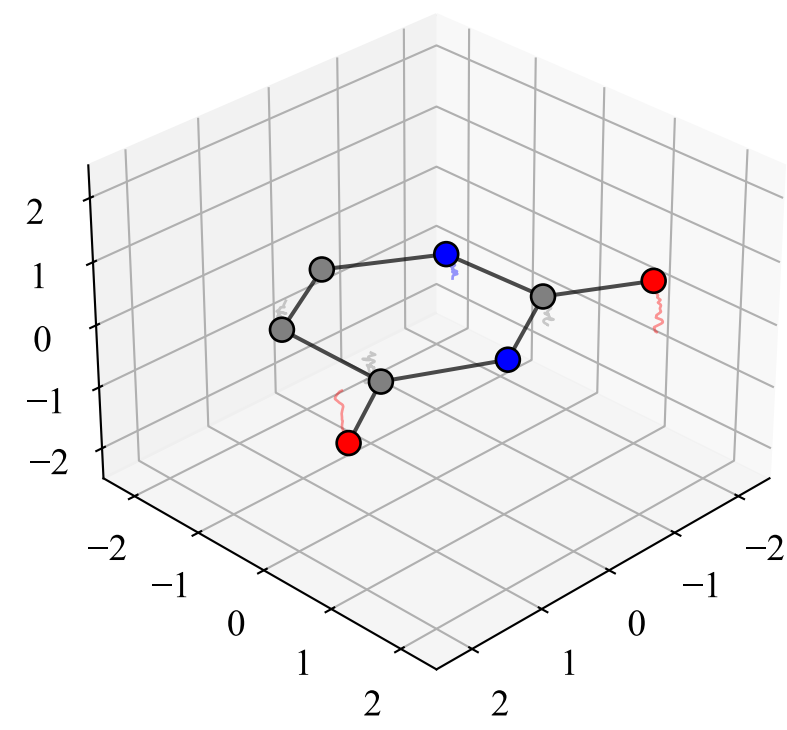

Uracil

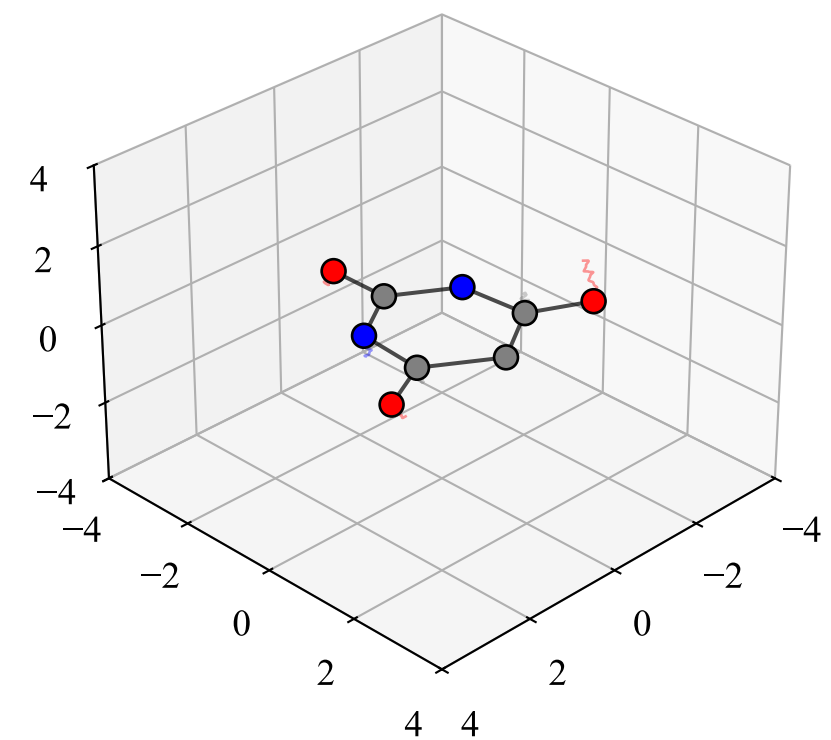

Uracil1

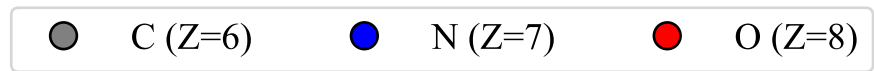

Supplement: supplementary_material [file tg80_combined_trajectories_4.pdf › Z_paper_content/trajectories/tg80_combined_trajectories_4.pdf]

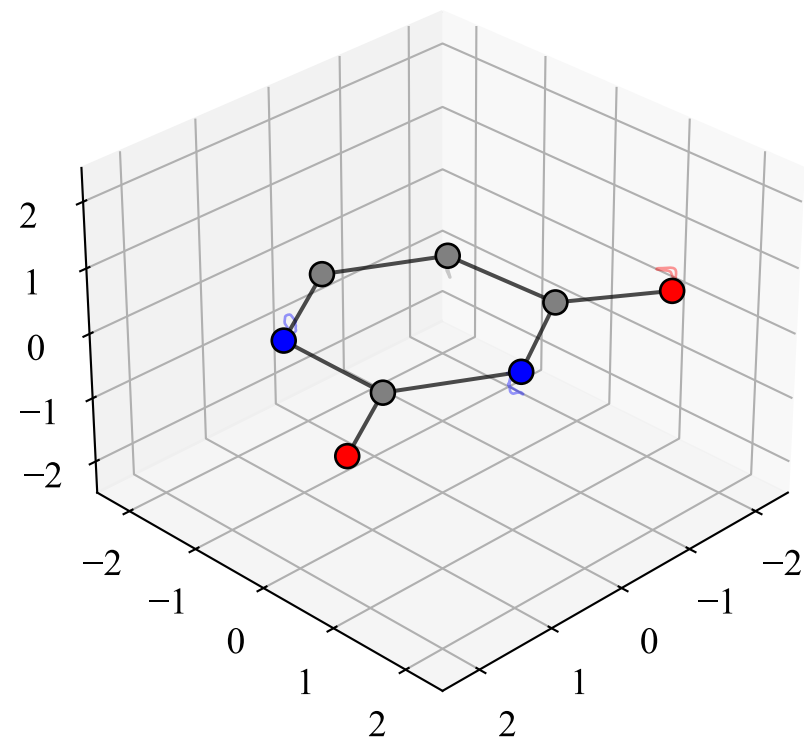

MD17 Uracil

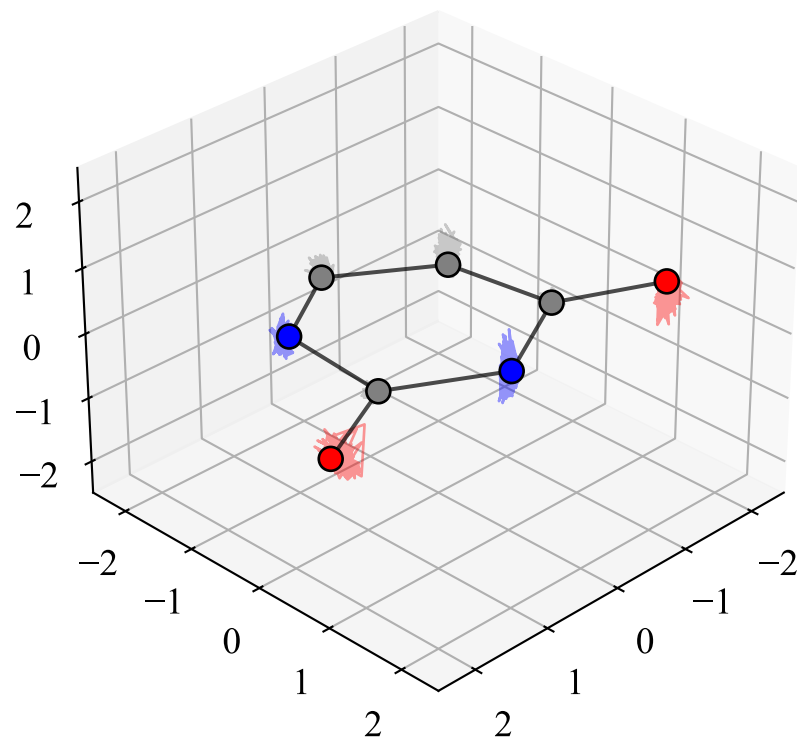

RMD17 Uracil

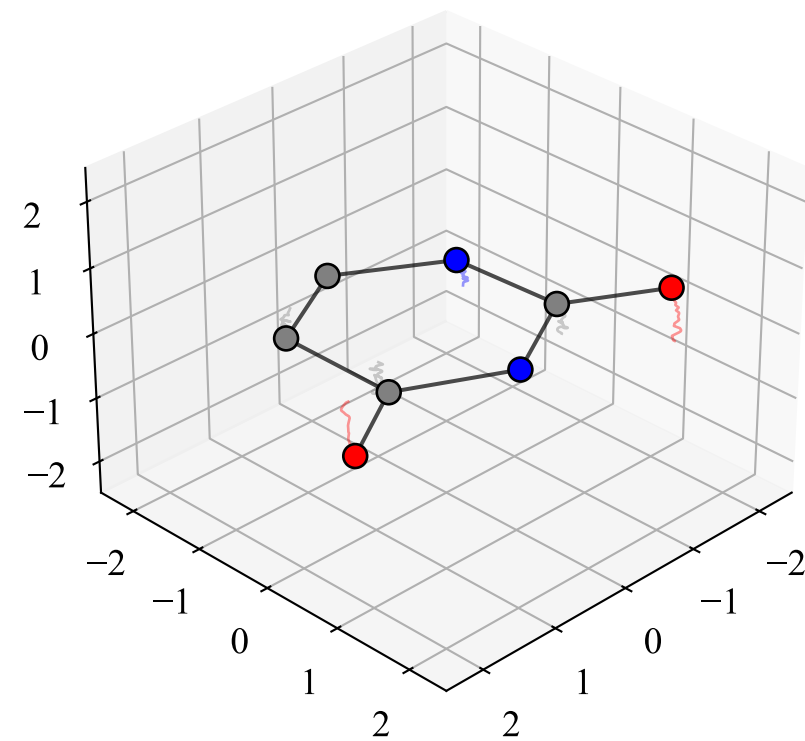

TG80 Uracil

C (Z=6)
  N (Z=7)
  O (Z=8)

Supplement: supplementary_material [file uracil_comparison.pdf › Z_paper_content/trajectories/uracil_comparison.pdf]
